# Supplementary material for: Coordination of Cell Cycle Progression and Mitotic Spindle Assembly Involves Histone H3 Lysine 4 Methylation by Set1/COMPASS
Source: Oxford University Press journal article supplement (doi:10.1534/genetics.116.194852), 2016-11-15
Supplement: files1.xlsx [file files1.xlsx]

## Sheet: adj p value <0.05
	avg.expression	difference	P.Value	adj.P.Val	noise.P.Value	locus_tag	Length	gene	product
YHR119W	4.34944	-2.13491	4.08562e-11	2.25199e-07	0.97698	YHR119W	3443	SET1	Histone methyltransferase, subunit of the COMPASS (Set1C) complex COMPASS methylates histone H3K4 Set1p-dependent H3K4 trimethylation recruits Nrd1p, allowing efficient termination of snoRNAs and cryptic unstable transcripts (CUTs) by Nrd1p-Nab3p-Sen1p pathway modulates histone acetylation levels in promoter proximal regions to ensure efficient Nrd1p-dependent termination required in transcriptio…
YDR070C	4.32005	-1.77505	6.05111e-09	1.30274e-05	0.738167	YDR070C	482	FMP16	Putative protein of unknown function proposed to be involved in responding to conditions of stress the authentic, non-tagged protein is detected in highly purified mitochondria in high-throughput studies
YOR192C-C	6.07447	1.46855	7.85896e-09	1.30274e-05	0.451755	YOR192C-C	437	YOR192C-C	Putative protein of unknown function identified by expression profiling and mass spectrometry
YMR316W	6.2657	-2.21066	1.01395e-08	1.30274e-05	0.0425436	YMR316W	1211	DIA1	Protein of unknown function, involved in invasive and pseudohyphal growth green fluorescent protein (GFP)-fusion protein localizes to the cytoplasm in a punctate pattern
YDR261W-B/YDR261W-A	5.53078	1.14497	1.18173e-08	1.30274e-05	0.962403	YDR261W-B/YDR261W-A	5514	YDR261W-B/YDR261W-A	Retrotransposon TYA Gag and TYB Pol genes transcribed/translated as one unit polyprotein is processed to make a nucleocapsid-like protein (Gag), reverse transcriptase (RT), protease (PR), and integrase (IN) similar to retroviral genes/Retrotransposon TYA Gag gene co-transcribed with TYB Pol translated as TYA or TYA-TYB polyprotein Gag is a nucleocapsid protein that is the structural constituent o…
YGL053W	5.60219	-2.42611	2.19145e-08	1.77895e-05	0.0324303	YGL053W	914	PRM8	Pheromone-regulated protein with 2 predicted transmembrane segments and an FF sequence, a motif involved in COPII binding forms a complex with Prp9p in the ER member of DUP240 gene family
YOL058W	4.98893	2.20861	2.25919e-08	1.77895e-05	0.104225	YOL058W	1463	ARG1	Arginosuccinate synthetase, catalyzes the formation of L-argininosuccinate from citrulline and L-aspartate in the arginine biosynthesis pathway potential Cdc28p substrate
YGR109W-B/YGR109W-A	7.54234	-1.57112	2.66836e-08	1.8385e-05	0.151449	YGR109W-B/YGR109W-A	4845	YGR109W-B/YGR109W-A	Retrotransposon TYA Gag and TYB Pol genes transcribed/translated as one unit polyprotein is processed to make a nucleocapsid-like protein (Gag), reverse transcriptase (RT), protease (PR), and integrase (IN) similar to retroviral genes/Retrotransposon TYA Gag gene co-transcribed with TYB Pol translated as TYA or TYA-TYB polyprotein Gag is a nucleocapsid protein that is the structural constituent o…
YLR227W-B/YLR227W-A	8.61598	1.01262	3.34665e-08	1.98026e-05	0.839148	YLR227W-B/YLR227W-A	5469	YLR227W-B/YLR227W-A	Retrotransposon TYA Gag and TYB Pol genes transcribed/translated as one unit polyprotein is processed to make a nucleocapsid-like protein (Gag), reverse transcriptase (RT), protease (PR), and integrase (IN) similar to retroviral genes/Retrotransposon TYA Gag gene co-transcribed with TYB Pol translated as TYA or TYA-TYB polyprotein Gag is a nucleocapsid protein that is the structural constituent o…
YJR025C	7.02222	-1.23404	3.80787e-08	1.98026e-05	0.444993	YJR025C	734	BNA1	3-hydroxyanthranilic acid dioxygenase, required for the de novo biosynthesis of NAD from tryptophan via kynurenine expression regulated by Hst1p
YPL156C	6.2478	-3.16909	4.25465e-08	1.98026e-05	0.00315221	YPL156C	1055	PRM4	Pheromone-regulated protein proposed to be involved in mating predicted to have 1 transmembrane segment transcriptionally regulated by Ste12p during mating and by Cat8p during the diauxic shift
YMR045C/YMR046C	8.38454	1.01342	4.31117e-08	1.98026e-05	0.800231	YMR045C/YMR046C	5469	YMR045C/YMR046C	Retrotransposon TYA Gag and TYB Pol genes transcribed/translated as one unit polyprotein is processed to make a nucleocapsid-like protein (Gag), reverse transcriptase (RT), protease (PR), and integrase (IN) similar to retroviral genes/Retrotransposon TYA Gag gene co-transcribed with TYB Pol translated as TYA or TYA-TYB polyprotein Gag is a nucleocapsid protein that is the structural constituent o…
YIL082W-A/YIL082W	4.49761	-1.9944	7.1687e-08	2.9508e-05	0.152043	YIL082W-A/YIL082W	4698	YIL082W-A/YIL082W	Retrotransposon TYA Gag and TYB Pol genes transcribed/translated as one unit polyprotein is processed to make a nucleocapsid-like protein (Gag), reverse transcriptase (RT), protease (PR), and integrase (IN) similar to retroviral genes/Retrotransposon TYA Gag gene co-transcribed with TYB Pol translated as TYA or TYA-TYB polyprotein Gag is a nucleocapsid protein that is the structural constituent o…
YGR243W	4.97878	-1.91313	7.49478e-08	2.9508e-05	0.121384	YGR243W	641	FMP43	Putative protein of unknown function expression regulated by osmotic and alkaline stresses the authentic, non-tagged protein is detected in highly purified mitochondria in high-throughput studies
YJL170C	8.17393	-3.46189	8.53252e-08	3.11086e-05	0.000491382	YJL170C	830	ASG7	Protein that regulates signaling from a G protein beta subunit Ste4p and its relocalization within the cell specific to a-cells and induced by alpha-factor
YGL194C-A	5.10616	-1.62215	9.03007e-08	3.11086e-05	0.238195	YGL194C-A	443	YGL194C-A	Putative protein of unknown function, identified based on comparisons of the genome sequences of six Saccharomyces species
YLR040C	4.80556	-1.77824	1.15359e-07	3.52519e-05	0.187984	YLR040C	875	YLR040C	Putative protein of unknown function localizes to the cell wall predicted to be a GPI-attached protein upregulated by Mcm1p-Alpha1p transcription factor partially overlaps the dubious ORF YLR041W YLR040C is not essential
YPR137C-B/YPR137C-A	8.91096	0.95226	1.18079e-07	3.52519e-05	0.790219	YPR137C-B/YPR137C-A	5469	YPR137C-B/YPR137C-A	Retrotransposon TYA Gag and TYB Pol genes transcribed/translated as one unit polyprotein is processed to make a nucleocapsid-like protein (Gag), reverse transcriptase (RT), protease (PR), and integrase (IN) similar to retroviral genes/Retrotransposon TYA Gag gene co-transcribed with TYB Pol translated as TYA or TYA-TYB polyprotein Gag is a nucleocapsid protein that is the structural constituent o…
YLR042C	5.00661	-2.04067	1.26982e-07	3.52519e-05	0.0702644	YLR042C	686	YLR042C	Protein of unknown function localizes to the cytoplasm YLL042C is not an essential gene
YLR157C-B/YLR157C-A	9.19912	0.962162	1.2791e-07	3.52519e-05	0.766603	YLR157C-B/YLR157C-A	5469	YLR157C-B/YLR157C-A	Retrotransposon TYA Gag and TYB Pol genes transcribed/translated as one unit polyprotein is processed to make a nucleocapsid-like protein (Gag), reverse transcriptase (RT), protease (PR), and integrase (IN) similar to retroviral genes/Retrotransposon TYA Gag gene co-transcribed with TYB Pol translated as TYA or TYA-TYB polyprotein Gag is a nucleocapsid protein that is the structural constituent o…
YHR097C	5.19324	-1.65725	1.43552e-07	3.60674e-05	0.15685	YHR097C	1425	YHR097C	Putative protein of unknown function green fluorescent protein (GFP)-fusion protein localizes to the cytoplasm and the nucleus
YCR009C	7.0909	-1.31983	1.48549e-07	3.60674e-05	0.200912	YCR009C	998	RVS161	Amphiphysin-like lipid raft protein interacts with Rvs167p and regulates polarization of the actin cytoskeleton, endocytosis, cell polarity, cell fusion and viability following starvation or osmotic stress
YOL155C	3.50938	3.00271	1.50499e-07	3.60674e-05	0.0376235	YOL155C	3104	HPF1	Haze-protective mannoprotein that reduces the particle size of aggregated proteins in white wines
YPL192C	6.64122	-2.51569	1.62984e-07	3.73667e-05	0.00480502	YPL192C	602	PRM3	Pheromone-regulated protein required for nuclear envelope fusion during karyogamy localizes to the outer face of the nuclear membrane interacts with Kar5p at the spindle pole body
YCL021W-A	4.55455	1.27027	1.69479e-07	3.73667e-05	0.7866	YCL021W-A	578	YCL021W-A	Putative protein of unknown function
YLR194C	7.62973	-2.92359	2.05488e-07	4.07195e-05	0.000989851	YLR194C	965	YLR194C	Structural constituent of the cell wall attached to the plasma membrane by a GPI-anchor expression is upregulated in response to cell wall stress
YMR198W	5.20355	-1.95138	2.06755e-07	4.07195e-05	0.0585826	YMR198W	1985	CIK1	Kinesin-associated protein required for both karyogamy and mitotic spindle organization, interacts stably and specifically with Kar3p and may function to target this kinesin to a specific cellular role has similarity to Vik1p
YBL005W-B/YBL005W-A	7.91664	1.00931	2.28611e-07	4.07195e-05	0.557411	YBL005W-B/YBL005W-A	5469	YBL005W-B/YBL005W-A	Retrotransposon TYA Gag and TYB Pol genes transcribed/translated as one unit polyprotein is processed to make a nucleocapsid-like protein (Gag), reverse transcriptase (RT), protease (PR), and integrase (IN) similar to retroviral genes/Retrotransposon TYA Gag gene co-transcribed with TYB Pol translated as TYA or TYA-TYB polyprotein Gag is a nucleocapsid protein that is the structural constituent o…
YPL257W-B/YPL257W-A	9.2073	0.922386	2.31165e-07	4.07195e-05	0.764426	YPL257W-B/YPL257W-A	5469	YPL257W-B/YPL257W-A	Retrotransposon TYA Gag and TYB Pol genes transcribed/translated as one unit polyprotein is processed to make a nucleocapsid-like protein (Gag), reverse transcriptase (RT), protease (PR), and integrase (IN) similar to retroviral genes/Retrotransposon TYA Gag gene co-transcribed with TYB Pol translated as TYA or TYA-TYB polyprotein Gag is a nucleocapsid protein that is the structural constituent o…
YNL279W	5.34581	-3.0171	2.31269e-07	4.07195e-05	0.00453501	YNL279W	2186	PRM1	Pheromone-regulated multispanning membrane protein involved in membrane fusion during mating predicted to have 5 transmembrane segments and a coiled coil domain localizes to the shmoo tip regulated by Ste12p
YOR142W-B/YOR142W-A	7.94614	0.806207	2.3299e-07	4.07195e-05	0.959874	YOR142W-B/YOR142W-A	5469	YOR142W-B/YOR142W-A	Retrotransposon TYA Gag and TYB Pol genes transcribed/translated as one unit polyprotein is processed to make a nucleocapsid-like protein (Gag), reverse transcriptase (RT), protease (PR), and integrase (IN) similar to retroviral genes/Retrotransposon TYA Gag gene co-transcribed with TYB Pol translated as TYA or TYA-TYB polyprotein Gag is a nucleocapsid protein that is the structural constituent o…
YJL108C/YJL107C	4.38401	-2.09001	2.40025e-07	4.07195e-05	0.0983259	YJL108C/YJL107C	2512	PRM10/YJL107C	Pheromone-regulated protein, proposed to be involved in mating predicted to have 5 transmembrane segments induced by treatment with 8-methoxypsoralen and UVA irradiation/Putative protein of unknown function expression is induced by activation of the HOG1 mitogen-activated signaling pathway and this induction is Hog1p/Pbs2p dependent YJL107C and adjacent ORF, YJL108C are merged in related fungi
YML039W/YML040W	9.19712	0.936098	2.43785e-07	4.07195e-05	0.724679	YML039W/YML040W	5469	YML039W/YML040W	Retrotransposon TYA Gag and TYB Pol genes transcribed/translated as one unit polyprotein is processed to make a nucleocapsid-like protein (Gag), reverse transcriptase (RT), protease (PR), and integrase (IN) similar to retroviral genes/Retrotransposon TYA Gag gene co-transcribed with TYB Pol translated as TYA or TYA-TYB polyprotein Gag is a nucleocapsid protein that is the structural constituent o…
YGR161C-D/YGR161C-C	7.9295	0.78246	2.60939e-07	4.23029e-05	0.976647	YGR161C-D/YGR161C-C	5469	YGR161C-D/YGR161C-C	Retrotransposon TYA Gag and TYB Pol genes transcribed/translated as one unit polyprotein is processed to make a nucleocapsid-like protein (Gag), reverse transcriptase (RT), protease (PR), and integrase (IN) similar to retroviral genes/Retrotransposon TYA Gag gene co-transcribed with TYB Pol translated as TYA or TYA-TYB polyprotein Gag is a nucleocapsid protein that is the structural constituent o…
YJR027W/YJR026W	8.95599	0.912885	2.82439e-07	4.44802e-05	0.746226	YJR027W/YJR026W	5469	YJR027W/YJR026W	Retrotransposon TYA Gag and TYB Pol genes transcribed/translated as one unit polyprotein is processed to make a nucleocapsid-like protein (Gag), reverse transcriptase (RT), protease (PR), and integrase (IN) similar to retroviral genes/Retrotransposon TYA Gag gene co-transcribed with TYB Pol translated as TYA or TYA-TYB polyprotein Gag is a nucleocapsid protein that is the structural constituent o…
YGR260W	6.9809	0.873788	2.98155e-07	4.53876e-05	0.854311	YGR260W	1805	TNA1	High affinity nicotinic acid plasma membrane permease, responsible for uptake of low levels of nicotinic acid expression of the gene increases in the absence of extracellular nicotinic acid or para-aminobenzoate (PABA)
YCL055W	5.8003	-2.40368	3.0467e-07	4.53876e-05	0.00846299	YCL055W	1208	KAR4	Transcription factor required for gene regulation in response to pheromones also required during meiosis exists in two forms, a slower-migrating form more abundant during vegetative growth and a faster-migrating form induced by pheromone
YDR365W-B/YDR365W-A	8.93239	0.879341	3.21548e-07	4.55804e-05	0.801803	YDR365W-B/YDR365W-A	5469	YDR365W-B/YDR365W-A	Retrotransposon TYA Gag and TYB Pol genes transcribed/translated as one unit polyprotein is processed to make a nucleocapsid-like protein (Gag), reverse transcriptase (RT), protease (PR), and integrase (IN) similar to retroviral genes/Retrotransposon TYA Gag gene co-transcribed with TYB Pol translated as TYA or TYA-TYB polyprotein Gag is a nucleocapsid protein that is the structural constituent o…
YER138C/YER137C-A	9.20599	0.953909	3.39509e-07	4.55804e-05	0.632064	YER138C/YER137C-A	5469	YER138C/YER137C-A	Retrotransposon TYA Gag and TYB Pol genes transcribed/translated as one unit polyprotein is processed to make a nucleocapsid-like protein (Gag), reverse transcriptase (RT), protease (PR), and integrase (IN) similar to retroviral genes/Retrotransposon TYA Gag gene co-transcribed with TYB Pol translated as TYA or TYA-TYB polyprotein Gag is a nucleocapsid protein that is the structural constituent o…
YJL037W	3.49016	2.20808	3.41927e-07	4.55804e-05	0.263408	YJL037W	875	IRC18	Putative protein of unknown function expression induced in respiratory-deficient cells and in carbon-limited chemostat cultures similar to adjacent ORF, YJL038C null mutant displays increased levels of spontaneous Rad52p foci
YOL164W	5.2579	-1.04823	3.50874e-07	4.55804e-05	0.759295	YOL164W	2141	BDS1	Bacterially-derived sulfatase required for use of alkyl- and aryl-sulfates as sulfur sources
YMR065W	4.90829	-1.83611	3.55117e-07	4.55804e-05	0.094142	YMR065W	1715	KAR5	Protein required for nuclear membrane fusion during karyogamy, localizes to the membrane with a soluble portion in the endoplasmic reticulum lumen, may form a complex with Jem1p and Kar2p expression of the gene is regulated by pheromone
YBR115C	6.9148	1.02017	3.5558e-07	4.55804e-05	0.519802	YBR115C	4379	LYS2	Alpha aminoadipate reductase, catalyzes the reduction of alpha-aminoadipate to alpha-aminoadipate 6-semialdehyde, which is the fifth step in biosynthesis of lysine activation requires posttranslational phosphopantetheinylation by Lys5p
YAL018C	0.68313	2.96371	3.77679e-07	4.56852e-05	0.857125	YAL018C	1178	YAL018C	Putative protein of unknown function
YJR029W/YJR028W	9.06747	0.863809	3.80212e-07	4.56852e-05	0.815816	YJR029W/YJR028W	5469	YJR029W/YJR028W	Retrotransposon TYA Gag and TYB Pol genes transcribed/translated as one unit polyprotein is processed to make a nucleocapsid-like protein (Gag), reverse transcriptase (RT), protease (PR), and integrase (IN) similar to retroviral genes/Retrotransposon TYA Gag gene co-transcribed with TYB Pol translated as TYA or TYA-TYB polyprotein Gag is a nucleocapsid protein that is the structural constituent o…
YDL127W	6.53666	-1.84266	3.81263e-07	4.56852e-05	0.0227717	YDL127W	1127	PCL2	Cyclin, interacts with cyclin-dependent kinase Pho85p member of the Pcl1,2-like subfamily, involved in the regulation of polarized growth and morphogenesis and progression through the cell cycle localizes to sites of polarized cell growth
YMR226C	7.90996	-0.816113	4.23282e-07	4.96411e-05	0.889793	YMR226C	1004	YMR226C	NADP(+)-dependent dehydrogenase acts on serine, L-allo-threonine, and other 3-hydroxy acids green fluorescent protein fusion protein localizes to the cytoplasm and nucleus may interact with ribosomes, based on co-purification experiments
YNL284C-B/YNL284C-A	8.02036	0.757652	4.45067e-07	5.11085e-05	0.970866	YNL284C-B/YNL284C-A	5469	YNL284C-B/YNL284C-A	Retrotransposon TYA Gag and TYB Pol genes transcribed/translated as one unit polyprotein is processed to make a nucleocapsid-like protein (Gag), reverse transcriptase (RT), protease (PR), and integrase (IN) similar to retroviral genes/Retrotransposon TYA Gag gene co-transcribed with TYB Pol translated as TYA or TYA-TYB polyprotein Gag is a nucleocapsid protein that is the structural constituent o…
YDR530C	6.11774	-1.21284	4.80574e-07	5.40597e-05	0.260422	YDR530C	1178	APA2	Diadenosine 5',5''-P1,P4-tetraphosphate phosphorylase II (AP4A phosphorylase), involved in catabolism of bis(5'-nucleosidyl) tetraphosphates has similarity to Apa1p
YMR173W/YMR173W-A	8.21915	-1.28741	5.0696e-07	5.58872e-05	0.124424	YMR173W/YMR173W-A	1593	DDR48/YMR173W-A	DNA damage-responsive protein, expression is increased in response to heat-shock stress or treatments that produce DNA lesions contains multiple repeats of the amino acid sequence NNNDSYGS/Dubious open reading frame unlikely to encode a protein, based on available experimental and comparative sequence data overlaps the verified gene DDR48/YML173W
YLR327C	4.58525	-1.73796	5.18506e-07	5.60393e-05	0.135975	YLR327C	461	TMA10	Protein of unknown function that associates with ribosomes putative homolog of the F1F0-ATPase synthase regulator Stf2p
YDR085C	4.99822	-2.68624	5.88225e-07	6.13971e-05	0.0068206	YDR085C	2063	AFR1	Protein required for pheromone-induced projection (shmoo) formation regulates septin architecture during mating has an RVXF motif that mediates targeting of Glc7p to mating projections interacts with Cdc12p
YBL016W	7.29146	-1.84934	5.90356e-07	6.13971e-05	0.0134407	YBL016W	1262	FUS3	Mitogen-activated serine/threonine protein kinase involved in mating phosphoactivated by Ste7p substrates include Ste12p, Far1p, Bni1p, Sst2p inhibits invasive growth during mating by phosphorylating Tec1p, promoting its degradation
YOL016C	5.7838	-1.564	6.93754e-07	6.99451e-05	0.0672656	YOL016C	1544	CMK2	Calmodulin-dependent protein kinase may play a role in stress response, many CA++/calmodulan dependent phosphorylation substrates demonstrated in vitro, amino acid sequence similar to Cmk1p and mammalian Cam Kinase II
YOR072W-B	3.27299	-1.63989	6.97928e-07	6.99451e-05	0.678477	YOR072W-B	362	YOR072W-B	Putative protein of unknown function identified by expression profiling and mass spectrometry
YKL128C	7.77415	-0.977506	7.16005e-07	7.04753e-05	0.456883	YKL128C	1088	PMU1	Putative phosphomutase, contains a region homologous to the active site of phosphomutases overexpression suppresses the histidine auxotrophy of an ade3 ade16 ade17 triple mutant and the temperature sensitivity of a tps2 mutant
YGR027W-B/YGR027W-A	9.1578	0.828911	8.15635e-07	7.88733e-05	0.786033	YGR027W-B/YGR027W-A	5469	YGR027W-B/YGR027W-A	Retrotransposon TYA Gag and TYB Pol genes transcribed/translated as one unit polyprotein is processed to make a nucleocapsid-like protein (Gag), reverse transcriptase (RT), protease (PR), and integrase (IN) similar to retroviral genes/Retrotransposon TYA Gag gene co-transcribed with TYB Pol translated as TYA or TYA-TYB polyprotein Gag is a nucleocapsid protein that is the structural constituent o…
YCL056C	4.46769	-1.12632	8.40794e-07	7.91828e-05	0.802382	YCL056C	635	YCL056C	Peroxisomal integral membrane protein that regulates peroxisome populations interacts with Pex11p, Pex25p, and Pex27p to control both constitutive peroxisome division and peroxisome morphology and abundance during peroxisome proliferation
YGL192W	4.09075	-3.0163	8.47566e-07	7.91828e-05	0.00911563	YGL192W	2003	IME4	Probable mRNA N6-adenosine methyltransferase required for entry into meiosis transcribed in diploid cells haploids repress IME4 transcription via production of antisense IME4 transcripts antisense transcription is repressed in diploids
YAR009C	8.74194	1.03618	9.0589e-07	8.32211e-05	0.319286	YAR009C	3791	YAR009C	Retrotransposon TYA Gag and TYB Pol genes in YARCTY1-1 TYB is mutant and probably non-functional
YPR007C	1.42687	2.27836	9.42155e-07	8.48873e-05	0.925893	YPR007C	2243	REC8	Meiosis-specific component of sister chromatid cohesion complex maintains cohesion between sister chromatids during meiosis I maintains cohesion between centromeres of sister chromatids until meiosis II homolog of S. pombe Rec8p
YML045W/YML045W-A	8.02775	0.702132	9.59208e-07	8.48873e-05	0.982401	YML045W/YML045W-A	5469	YML045W/YML045W-A	Retrotransposon TYA Gag and TYB Pol genes transcribed/translated as one unit polyprotein is processed to make a nucleocapsid-like protein (Gag), reverse transcriptase (RT), protease (PR), and integrase (IN) similar to retroviral genes/Retrotransposon TYA Gag gene co-transcribed with TYB Pol translated as TYA or TYA-TYB polyprotein Gag is a nucleocapsid protein that is the structural constituent o…
YPR158C-D/YPR158C-C	8.62117	0.726697	9.70229e-07	8.48873e-05	0.956821	YPR158C-D/YPR158C-C	5469	YPR158C-D/YPR158C-C	Retrotransposon TYA Gag and TYB Pol genes transcribed/translated as one unit polyprotein is processed to make a nucleocapsid-like protein (Gag), reverse transcriptase (RT), protease (PR), and integrase (IN) similar to retroviral genes/Retrotransposon TYA Gag gene co-transcribed with TYB Pol translated as TYA or TYA-TYB polyprotein Gag is a nucleocapsid protein that is the structural constituent o…
YCR089W	7.86519	-3.17682	1.0231e-06	8.81149e-05	0.00024501	YCR089W	5030	FIG2	Cell wall adhesin, expressed specifically during mating may be involved in maintenance of cell wall integrity during mating
YIL117C	4.67374	-2.78208	1.08627e-06	9.21161e-05	0.00721529	YIL117C	1157	PRM5	Pheromone-regulated protein, predicted to have 1 transmembrane segment induced during cell integrity signaling
YHR209W	3.50472	-1.48483	1.11073e-06	9.24372e-05	0.704329	YHR209W	1076	CRG1	mRNA binding protein and putative S-adenosylmethionine-dependent methyltransferase mediates cantharidin resistance
YKL096W-A	13.4703	-0.885265	1.12792e-06	9.24372e-05	0.857781	YKL096W-A	479	CWP2	Covalently linked cell wall mannoprotein, major constituent of the cell wall plays a role in stabilizing the cell wall involved in low pH resistance precursor is GPI-anchored
YJR047C	3.51862	1.89025	1.14037e-06	9.24372e-05	0.296827	YJR047C	674	ANB1	Translation elongation factor eIF-5A, previously thought to function in translation initiation similar to and functionally redundant with Hyp2p undergoes an essential hypusination modification expressed under anaerobic conditions
YOR209C	7.442	-0.779001	1.20137e-06	9.59704e-05	0.847128	YOR209C	1490	NPT1	Nicotinate phosphoribosyltransferase, acts in the salvage pathway of NAD+ biosynthesis required for silencing at rDNA and telomeres and has a role in silencing at mating-type loci localized to the nucleus
YNR044W	7.33521	-3.03955	1.23917e-06	9.64027e-05	0.000331729	YNR044W	2378	AGA1	Anchorage subunit of a-agglutinin of a-cells, highly O-glycosylated protein with N-terminal secretion signal and C-terminal signal for addition of GPI anchor to cell wall, linked to adhesion subunit Aga2p via two disulfide bonds
YBR148W	4.28398	0.967382	1.24176e-06	9.64027e-05	0.98961	YBR148W	2030	YSW1	Protein required for normal prospore membrane formation interacts with Gip1p, which is the meiosis-specific regulatory subunit of the Glc7p protein phosphatase expressed specifically in spores and localizes to the prospore membrane
YGR032W	6.901	-1.67961	1.26114e-06	9.6547e-05	0.018426	YGR032W	5888	GSC2	Catalytic subunit of 1,3-beta-glucan synthase, involved in formation of the inner layer of the spore wall activity positively regulated by Rho1p and negatively by Smk1p has similarity to an alternate catalytic subunit, Fks1p (Gsc1p)
YMR232W	5.70001	-2.84407	1.31727e-06	9.94627e-05	0.00166072	YMR232W	2234	FUS2	Cytoplasmic protein localized to the shmoo tip required for the alignment of parental nuclei before nuclear fusion during mating
YLR452C	6.61544	-1.72784	1.39243e-06	0.000103717	0.016866	YLR452C	2297	SST2	GTPase-activating protein for Gpa1p, regulates desensitization to alpha factor pheromone also required to prevent receptor-independent signaling of the mating pathway member of the RGS (regulator of G-protein signaling) family
YDR135C	7.70226	0.743863	1.46065e-06	0.000107348	0.894188	YDR135C	4748	YCF1	Vacuolar glutathione S-conjugate transporter of the ATP-binding cassette family, has a role in detoxifying metals such as cadmium, mercury, and arsenite also transports unconjugated bilirubin similar to human cystic fibrosis protein CFTR
YPR158W-B/YPR158W-A	8.54843	0.714103	1.58396e-06	0.000114879	0.934445	YPR158W-B/YPR158W-A	5472	YPR158W-B/YPR158W-A	Retrotransposon TYA Gag and TYB Pol genes transcribed/translated as one unit polyprotein is processed to make a nucleocapsid-like protein (Gag), reverse transcriptase (RT), protease (PR), and integrase (IN) similar to retroviral genes/Retrotransposon TYA Gag gene co-transcribed with TYB Pol translated as TYA or TYA-TYB polyprotein Gag is a nucleocapsid protein that is the structural constituent o…
YOR192C-B/YOR192C-A	4.82197	0.950462	1.61005e-06	0.000115255	0.879415	YOR192C-B/YOR192C-A	5514	YOR192C-B/YOR192C-A	Retrotransposon TYA Gag and TYB Pol genes transcribed/translated as one unit polyprotein is processed to make a nucleocapsid-like protein (Gag), reverse transcriptase (RT), protease (PR), and integrase (IN) similar to retroviral genes/Retrotransposon TYA Gag gene co-transcribed with TYB Pol translated as TYA or TYA-TYB polyprotein Gag is a nucleocapsid protein that is the structural constituent o…
YML047C	4.14296	-3.38507	1.67334e-06	0.000118249	0.00488761	YML047C	1259	PRM6	Pheromone-regulated protein, predicted to have 2 transmembrane segments regulated by Ste12p during mating
YHR214W-A	2.75948	2.25723	1.70116e-06	0.000118693	0.29811	YHR214W-A	686	YHR214W-A	Dubious open reading frame unlikely to encode a protein, based on experimental and comparative sequence data similar to the fungal specific protein encoded by YAR068W induced by zinc deficiency
YHR030C	6.92406	-1.44341	1.79834e-06	0.000123905	0.0388279	YHR030C	1655	SLT2	Serine/threonine MAP kinase involved in regulating maintenance of cell wall integrity, progression through the cell cycle, and nuclear mRNA retention in heat shock required for mitophagy and pexophagy affects recruitment of mitochondria to the phagophore assembly site (PAS) regulated by the PKC1-mediated signaling pathway
YOL103W-B/YOL103W-A	8.89403	0.789343	1.85745e-06	0.00012503	0.746885	YOL103W-B/YOL103W-A	5469	YOL103W-B/YOL103W-A	Retrotransposon TYA Gag and TYB Pol genes transcribed/translated as one unit polyprotein is processed to make a nucleocapsid-like protein (Gag), reverse transcriptase (RT), protease (PR), and integrase (IN) similar to retroviral genes/Retrotransposon TYA Gag gene co-transcribed with TYB Pol translated as TYA or TYA-TYB polyprotein Gag is a nucleocapsid protein that is the structural constituent o…
YDR261C-D/YDR261C-C	8.68169	0.722569	1.86002e-06	0.00012503	0.903475	YDR261C-D/YDR261C-C	5016	YDR261C-D/YDR261C-C	Retrotransposon TYA Gag and TYB Pol genes in YDRCTY1-3 TYB is mutant and probably non-functional/Retrotransposon TYA Gag gene co-transcribed with TYB Pol in YDRCTY1-3 TYB is mutant and probably non-functional
YLR157W-E	6.35388	-1.35975	1.98407e-06	0.000131761	0.0688525	YLR157W-E	365	YLR157W-E	Putative protein of unknown function identified by gene-trapping, microarray-based expression analysis, and genome-wide homology searching partially overlaps a Ty1 element
YHR005C	7.23667	-1.33533	2.0725e-06	0.00013486	0.0592925	YHR005C	1619	GPA1	GTP-binding alpha subunit of the heterotrimeric G protein that couples to pheromone receptors negatively regulates the mating pathway by sequestering G(beta)gamma and by triggering an adaptive response activates Vps34p at the endosome
YBR040W	5.64029	-3.79478	2.09479e-06	0.00013486	0.000340299	YBR040W	1097	FIG1	Integral membrane protein required for efficient mating may participate in or regulate the low affinity Ca2+ influx system, which affects intracellular signaling and cell-cell fusion during mating
YNL134C	7.87379	0.797615	2.1082e-06	0.00013486	0.702043	YNL134C	1331	YNL134C	Putative protein of unknown function with similarity to dehydrogenases from other model organisms green fluorescent protein (GFP)-fusion protein localizes to both the cytoplasm and nucleus and is induced by the DNA-damaging agent MMS
YGL052W/YGL051W	3.5613	-1.33566	2.1286e-06	0.00013486	0.72288	YGL052W/YGL051W	1155	YGL052W/MST27	Dubious open reading frame unlikely to encode a protein, based on available experimental and comparative sequence data partially overlaps the verified ORF MST27/Putative integral membrane protein, involved in vesicle formation forms complex with Mst28p member of DUP240 gene family binds COPI and COPII vesicles
YEL070W	0.732806	2.59925	2.17358e-06	0.000136145	0.83833	YEL070W	1709	DSF1	Deletion suppressor of mpt5 mutation
YER086W	10.4083	0.719189	2.41537e-06	0.00014959	0.93201	YER086W	1931	ILV1	Threonine deaminase, catalyzes the first step in isoleucine biosynthesis expression is under general amino acid control ILV1 locus exhibits highly positioned nucleosomes whose organization is independent of known ILV1 regulation
YDR316W-B/YDR316W-A	8.55307	0.717167	2.48093e-06	0.000151943	0.878735	YDR316W-B/YDR316W-A	5469	YDR316W-B/YDR316W-A	Retrotransposon TYA Gag and TYB Pol genes transcribed/translated as one unit polyprotein is processed to make a nucleocapsid-like protein (Gag), reverse transcriptase (RT), protease (PR), and integrase (IN) similar to retroviral genes/Retrotransposon TYA Gag gene co-transcribed with TYB Pol translated as TYA or TYA-TYB polyprotein Gag is a nucleocapsid protein that is the structural constituent o…
YCL027W	5.39403	-2.43562	2.63735e-06	0.000159748	0.00442945	YCL027W	1739	FUS1	Membrane protein localized to the shmoo tip, required for cell fusion expression regulated by mating pheromone proposed to coordinate signaling, fusion, and polarization events required for fusion potential Cdc28p substrate
YGR209C	9.55533	-0.712656	2.73321e-06	0.000163755	0.899483	YGR209C	515	TRX2	Cytoplasmic thioredoxin isoenzyme of the thioredoxin system which protects cells against oxidative and reductive stress, forms LMA1 complex with Pbi2p, acts as a cofactor for Tsa1p, required for ER-Golgi transport and vacuole inheritance
YNL053W	6.19333	-1.30638	2.78072e-06	0.00016481	0.0770008	YNL053W	1670	MSG5	Dual-specificity protein phosphatase exists in 2 isoforms required for maintenance of a low level of signaling through the cell integrity pathway, adaptive response to pheromone regulates and is regulated by Slt2p dephosphorylates Fus3p
YKR061W	4.61092	-0.974788	3.22963e-06	0.00018938	0.795632	YKR061W	1478	KTR2	Mannosyltransferase involved in N-linked protein glycosylation member of the KRE2/MNT1 mannosyltransferase family
YFR047C	5.48324	-0.932807	3.31703e-06	0.00019203	0.562607	YFR047C	1088	BNA6	Quinolinate phosphoribosyl transferase, required for the de novo biosynthesis of NAD from tryptophan via kynurenine expression regulated by Hst1p
YHR053C	8.462	0.891456	3.3445e-06	0.00019203	0.398676	YHR053C	386	CUP1-1	Metallothionein, binds copper and mediates resistance to high concentrations of copper and cadmium locus is variably amplified in different strains, with two copies, CUP1-1 and CUP1-2, in the genomic sequence reference strain S288C
YGR038C-B/YGR038C-A	8.23418	0.644853	3.42976e-06	0.000194086	0.973059	YGR038C-B/YGR038C-A	5469	YGR038C-B/YGR038C-A	Retrotransposon TYA Gag and TYB Pol genes transcribed/translated as one unit polyprotein is processed to make a nucleocapsid-like protein (Gag), reverse transcriptase (RT), protease (PR), and integrase (IN) similar to retroviral genes/Retrotransposon TYA Gag gene co-transcribed with TYB Pol translated as TYA or TYA-TYB polyprotein Gag is a nucleocapsid protein that is the structural constituent o…
YML062C	5.74038	-0.851774	3.45073e-06	0.000194086	0.679404	YML062C	1379	MFT1	Subunit of the THO complex, which is a nuclear complex comprised of Hpr1p, Mft1p, Rlr1p, and Thp2p, that is involved in transcription elongation and mitotic recombination involved in telomere maintenance
YGL248W	5.45686	-0.893553	3.52329e-06	0.000195037	0.646319	YGL248W	1310	PDE1	Low-affinity cyclic AMP phosphodiesterase, controls glucose and intracellular acidification-induced cAMP signaling, target of the cAMP-protein kinase A (PKA) pathway glucose induces transcription and inhibits translation
YLR350W	6.16665	-1.09646	3.5384e-06	0.000195037	0.188553	YLR350W	851	ORM2	Evolutionarily conserved protein, similar to Orm1p, required for resistance to agents that induce unfolded protein response Orm1p and Orm2p together control membrane biogenesis by coordinating lipid homeostasis with protein quality control
YPL095C	3.70146	-1.41376	3.64773e-06	0.000199072	0.493256	YPL095C	1571	EEB1	Acyl-coenzymeA:ethanol O-acyltransferase responsible for the major part of medium-chain fatty acid ethyl ester biosynthesis during fermentation possesses short-chain esterase activity may be involved in lipid metabolism and detoxification
YOR289W	3.11456	-1.72564	4.0356e-06	0.000217702	0.363499	YOR289W	956	YOR289W	Putative protein of unknown function transcription induced by the unfolded protein response green fluorescent protein (GFP)-fusion protein localizes to both the cytoplasm and the nucleus
YMR050C/YMR051C	8.86369	0.766838	4.06808e-06	0.000217702	0.674108	YMR050C/YMR051C	5469	YMR050C/YMR051C	Retrotransposon TYA Gag and TYB Pol genes transcribed/translated as one unit polyprotein is processed to make a nucleocapsid-like protein (Gag), reverse transcriptase (RT), protease (PR), and integrase (IN) similar to retroviral genes/Retrotransposon TYA Gag gene co-transcribed with TYB Pol translated as TYA or TYA-TYB polyprotein Gag is a nucleocapsid protein that is the structural constituent o…
YPR093C	3.96566	-0.962498	4.22935e-06	0.000224155	0.987689	YPR093C	1067	ASR1	Ubiquitin ligase that modifies and regulates RNA Pol II involved in a putative alcohol-responsive signaling pathway accumulates in the nucleus under alcohol stress contains a Ring/PHD finger domain similar to the mammalian rA9 protein
YFL047W	6.09791	-0.8315	4.58038e-06	0.000240448	0.61919	YFL047W	2345	RGD2	GTPase-activating protein (RhoGAP) for Cdc42p and Rho5p
YNL163C	4.81595	0.784348	4.76815e-06	0.000247944	0.985231	YNL163C	3533	RIA1	Cytoplasmic GTPase involved in biogenesis of the 60S ribosome has similarity to translation elongation factor 2 (Eft1p and Eft2p)
YIL099W	3.27393	1.64607	5.01559e-06	0.000258373	0.356378	YIL099W	1850	SGA1	Intracellular sporulation-specific glucoamylase involved in glycogen degradation induced during starvation of a/a diploids late in sporulation, but dispensable for sporulation
YGR161W-B/YGR161W-A	5.94533	0.750939	5.1075e-06	0.000260219	0.846281	YGR161W-B/YGR161W-A	5514	YGR161W-B/YGR161W-A	Retrotransposon TYA Gag and TYB Pol genes transcribed/translated as one unit polyprotein is processed to make a nucleocapsid-like protein (Gag), reverse transcriptase (RT), protease (PR), and integrase (IN) similar to retroviral genes/Retrotransposon TYA Gag gene co-transcribed with TYB Pol translated as TYA or TYA-TYB polyprotein Gag is a nucleocapsid protein that is the structural constituent o…
YOL004W	6.92818	0.612792	5.14584e-06	0.000260219	0.992999	YOL004W	4811	SIN3	Component of the Sin3p-Rpd3p histone deacetylase complex, involved in transcriptional repression and activation of diverse processes, including mating-type switching and meiosis involved in the maintenance of chromosomal integrity
YOL159C	6.31388	-0.855778	5.21903e-06	0.000261521	0.497087	YOL159C	716	YOL159C	Soluble protein of unknown function deletion mutants are viable and have elevated levels of Ty1 retrotransposition and Ty1 cDNA
YLR104W	7.22105	-0.752503	5.36406e-06	0.000264192	0.692279	YLR104W	596	LCL2	Putative protein of unknown function mutant is deficient in amounts of cell wall mannosylphosphate and has long chronological lifespan genetic interactions suggest a role in ER-associated protein degradation (ERAD)
YGR286C	5.15916	1.01186	5.36821e-06	0.000264192	0.444087	YGR286C	1328	BIO2	Biotin synthase, catalyzes the conversion of dethiobiotin to biotin, which is the last step of the biotin biosynthesis pathway complements E. coli bioB mutant
YIL040W	6.67786	-0.841038	5.42649e-06	0.000264698	0.486939	YIL040W	617	APQ12	Protein required for nuclear envelope morphology, nuclear pore complex localization, mRNA export from the nucleus exhibits synthetic lethal genetic interactions with genes involved in lipid metabolism
YNL020C	4.73337	-1.02745	5.48248e-06	0.000265083	0.537799	YNL020C	2117	ARK1	Serine/threonine protein kinase involved in regulation of the cortical actin cytoskeleton involved in control of endocytosis
YHR055C	8.53048	0.898232	5.83783e-06	0.00027981	0.310692	YHR055C	386	CUP1-2	Metallothionein, binds copper and mediates resistance to high concentrations of copper and cadmium locus is variably amplified in different strains, with two copies, CUP1-1 and CUP1-2, in the genomic sequence reference strain S288C
YLR414C	5.87086	-1.22091	6.12065e-06	0.000290836	0.0934811	YLR414C	992	PUN1	Plasma membrane protein with a role in cell wall integrity co-localizes with Sur7p in punctate membrane patches null mutant displays decreased thermotolerance transcription induced upon cell wall damage and metal ion stress
YPR015C	3.25116	1.34601	6.47667e-06	0.000305123	0.730531	YPR015C	944	YPR015C	Putative protein of unknown function overexpression causes a cell cycle delay or arrest
YLL039C	6.74932	-1.25939	6.69563e-06	0.000309288	0.0500009	YLL039C	1346	UBI4	Ubiquitin, becomes conjugated to proteins, marking them for selective degradation via the ubiquitin-26S proteasome system essential for the cellular stress response encoded as a polyubiquitin precursor comprised of 5 head-to-tail repeats
YKR091W	4.72278	-1.82072	6.73834e-06	0.000309288	0.0264322	YKR091W	941	SRL3	Cytoplasmic protein that, when overexpressed, suppresses the lethality of a rad53 null mutation potential Cdc28p substrate
YAR031W	4.69329	-1.16243	6.75e-06	0.000309288	0.316436	YAR031W	1097	PRM9	Pheromone-regulated protein with 3 predicted transmembrane segments and an FF sequence, a motif involved in COPII binding member of DUP240 gene family
YPR108W-A	4.28798	-1.22617	6.78952e-06	0.000309288	0.363673	YPR108W-A	413	YPR108W-A	Putative protein of unknown function identified by fungal homology and RT-PCR
YNL042W	6.91492	-0.996038	6.92132e-06	0.000312708	0.193899	YNL042W	1391	BOP3	Protein of unknown function, potential Cdc28p substrate overproduction confers resistance to methylmercury
YBR083W	6.54153	-1.50423	7.20902e-06	0.000323058	0.0178455	YBR083W	1661	TEC1	Transcription factor required for full Ty1 expression, Ty1-mediated gene activation, and haploid invasive and diploid pseudohyphal growth TEA/ATTS DNA-binding domain family member
YFL002W-A/YFL002W-B	5.97686	0.679845	7.76554e-06	0.000345191	0.939712	YFL002W-A/YFL002W-B	5514	YFL002W-A/YFL002W-B	Retrotransposon TYA Gag and TYB Pol genes transcribed/translated as one unit polyprotein is processed to make a nucleocapsid-like protein (Gag), reverse transcriptase (RT), protease (PR), and integrase (IN) similar to retroviral genes/Retrotransposon TYA Gag gene co-transcribed with TYB Pol translated as TYA or TYA-TYB polyprotein Gag is a nucleocapsid protein that is the structural constituent o…
YLR099C	5.30672	-1.26647	7.89007e-06	0.000347921	0.103226	YLR099C	1385	ICT1	Lysophosphatidic acid acyltransferase, responsible for enhanced phospholipid synthesis during organic solvent stress null displays increased sensitivity to Calcofluor white highly expressed during organic solvent stress
YAR010C	7.26106	0.689838	7.97021e-06	0.000348665	0.799791	YAR010C	1523	YAR010C	Retrotransposon TYA Gag gene co-transcribed with TYB Pol in YARCTY1-1 TYB is mutant and probably non-functional
YJR109C	5.60875	0.932669	8.03967e-06	0.000348935	0.400954	YJR109C	3557	CPA2	Large subunit of carbamoyl phosphate synthetase, which catalyzes a step in the synthesis of citrulline, an arginine precursor
YIL037C	4.743	-3.48567	8.13558e-06	0.000350339	0.000905014	YIL037C	2171	PRM2	Pheromone-regulated protein, predicted to have 4 transmembrane segments and a coiled coil domain regulated by Ste12p required for efficient nuclear fusion
YOR134W	2.33196	-2.10954	8.72165e-06	0.000372665	0.294056	YOR134W	1430	BAG7	Rho GTPase activating protein (RhoGAP), stimulates the intrinsic GTPase activity of Rho1p, which plays a role in actin cytoskeleton organization and control of cell wall synthesis structurally and functionally related to Sac7p
YBR085W	2.9072	1.38081	8.93355e-06	0.000378782	0.850932	YBR085W	1124	AAC3	Mitochondrial inner membrane ADP/ATP translocator, exchanges cytosolic ADP for mitochondrially synthesized ATP expressed under anaerobic conditions similar to Pet9p and Aac1p has roles in maintenance of viability and in respiration
YGR234W	7.87329	1.15771	9.0546e-06	0.000380984	0.0625868	YGR234W	1400	YHB1	Nitric oxide oxidoreductase, flavohemoglobin involved in nitric oxide detoxification plays a role in the oxidative and nitrosative stress responses
YER074W-A	7.44395	-0.694449	9.93515e-06	0.000414868	0.736618	YER074W-A	671	YOS1	Integral membrane protein required for ER to Golgi transport localized to the Golgi, the ER, and COPII vesicles interacts with Yip1p and Yif1p
YOR202W/YOR203W/YOR204W	7.14956	0.789162	1.02167e-05	0.000421133	0.478413	YOR202W/YOR203W/YOR204W	2980	HIS3/YOR203W/DED1	Imidazoleglycerol-phosphate dehydratase, catalyzes the sixth step in histidine biosynthesis mutations cause histidine auxotrophy and sensitivity to Cu, Co, and Ni salts transcription is regulated by general amino acid control via Gcn4p/Dubious open reading frame unlikely to encode a protein, based on available experimental and comparative sequence data overlaps 5' end of essential DED1 gene requi…
YHR214C-B/YHR214C-C	7.44611	0.709062	1.0238e-05	0.000421133	0.687862	YHR214C-B/YHR214C-C	5583	YHR214C-B/YHR214C-C	Retrotransposon TYA Gag and TYB Pol genes transcribed/translated as one unit polyprotein is processed to make a nucleocapsid-like protein (Gag), reverse transcriptase (RT), protease (PR), and integrase (IN) similar to retroviral genes/Retrotransposon TYA Gag gene co-transcribed with TYB Pol translated as TYA or TYA-TYB polyprotein Gag is a nucleocapsid protein that is the structural constituent o…
YOR381W	4.50053	-0.883601	1.04235e-05	0.000425589	0.831415	YOR381W	2336	FRE3	Ferric reductase, reduces siderophore-bound iron prior to uptake by transporters expression induced by low iron levels
YML058W-A	3.48364	1.29798	1.092e-05	0.000442579	0.511976	YML058W-A	407	HUG1	Protein involved in the Mec1p-mediated checkpoint pathway that responds to DNA damage or replication arrest, transcription is induced by DNA damage
YNL106C	5.08077	-0.947141	1.12363e-05	0.000449215	0.457393	YNL106C	3752	INP52	Polyphosphatidylinositol phosphatase, dephosphorylates a number of phosphatidylinositols (PIs) to PI involved in endocytosis hyperosmotic stress causes translocation to actin patches synaptojanin-like protein with a Sac1 domain
YOR367W	6.53739	-0.710135	1.12467e-05	0.000449215	0.731533	YOR367W	803	SCP1	Component of yeast cortical actin cytoskeleton, binds and cross links actin filaments originally identified by its homology to calponin (contains a calponin-like repeat) but the Scp1p domain structure is more similar to transgelin
YDR098C-B/YDR098C-A	8.22105	0.594765	1.14135e-05	0.000452598	0.95814	YDR098C-B/YDR098C-A	5469	YDR098C-B/YDR098C-A	Retrotransposon TYA Gag and TYB Pol genes transcribed/translated as one unit polyprotein is processed to make a nucleocapsid-like protein (Gag), reverse transcriptase (RT), protease (PR), and integrase (IN) similar to retroviral genes/Retrotransposon TYA Gag gene co-transcribed with TYB Pol translated as TYA or TYA-TYB polyprotein Gag is a nucleocapsid protein that is the structural constituent o…
YHR056C	5.1454	1.02466	1.18503e-05	0.000466564	0.316505	YHR056C	2852	RSC30	Component of the RSC chromatin remodeling complex non-essential gene required for regulation of ribosomal protein genes and the cell wall/stress response highly similar to Rsc3p null mutants are osmosensitive
YPR141C	5.87224	-1.25775	1.24447e-05	0.00048649	0.0561269	YPR141C	2390	KAR3	Minus-end-directed microtubule motor that functions in mitosis and meiosis, localizes to the spindle pole body and localization is dependent on functional Cik1p, required for nuclear fusion during mating potential Cdc28p substrate
YAL024C	6.07008	0.791156	1.25759e-05	0.000488156	0.557599	YAL024C	4508	LTE1	Protein similar to GDP/GTP exchange factors but without detectable GEF activity required for asymmetric localization of Bfa1p at daughter-directed spindle pole bodies and for mitotic exit at low temperatures
YOR343W-B/YOR343W-A	7.05462	0.74156	1.27786e-05	0.000492558	0.577564	YOR343W-B/YOR343W-A	5514	YOR343W-B/YOR343W-A	Retrotransposon TYA Gag and TYB Pol genes transcribed/translated as one unit polyprotein is processed to make a nucleocapsid-like protein (Gag), reverse transcriptase (RT), protease (PR), and integrase (IN) similar to retroviral genes/Retrotransposon TYA Gag gene co-transcribed with TYB Pol translated as TYA or TYA-TYB polyprotein Gag is a nucleocapsid protein that is the structural constituent o…
YIL059C	3.78444	-1.38259	1.29349e-05	0.000495121	0.282451	YIL059C	566	YIL059C	Dubious open reading frame unlikely to encode a protein, based on available experimental and comparative sequence data partially overlaps the uncharacterized ORF YIL060W
YHR126C	0.235841	2.78298	1.35273e-05	0.000512972	0.515077	YHR126C	680	ANS1	Putative protein of unknown function transcription dependent upon Azf1p
YGR268C	5.01916	-1.06725	1.35874e-05	0.000512972	0.258103	YGR268C	797	HUA1	Cytoplasmic protein containing a zinc finger domain with sequence similarity to that of Type I J-proteins computational analysis of large-scale protein-protein interaction data suggests a possible role in actin patch assembly
YOR343C	4.43311	-1.69379	1.38145e-05	0.000515515	0.0327398	YOR343C	527	YOR343C	Dubious open reading frame unlikely to encode a functional protein, based on available experimental and comparative sequence data
YGR007W	6.40123	-0.660958	1.38418e-05	0.000515515	0.844319	YGR007W	1172	ECT1	Ethanolamine-phosphate cytidylyltransferase, catalyzes the second step of phosphatidylethanolamine biosynthesis involved in the maintenance of plasma membrane similar to mammalian CTP: phosphocholine cytidylyl-transferases
YLL046C	2.12523	1.47553	1.39806e-05	0.000517188	0.96444	YLL046C	950	RNP1	Ribonucleoprotein that contains two RNA recognition motifs (RRM)
YLR136C	5.71996	-1.02127	1.52942e-05	0.000558828	0.182206	YLR136C	1058	TIS11	mRNA-binding protein expressed during iron starvation binds to a sequence element in the 3'-untranslated regions of specific mRNAs to mediate their degradation involved in iron homeostasis
YIL049W	6.04685	-0.734904	1.5309e-05	0.000558828	0.687093	YIL049W	962	DFG10	Probable polyprenol reductase that catalyzes conversion of polyprenol to dolichol, the precursor for N-glycosylation involved in filamentous growth mutations in human ortholog SRD5A3 confer CDG (Congenital Disorders of Glycosylation)
YMR062C	5.46584	0.898009	1.5772e-05	0.000571943	0.399332	YMR062C	1526	ARG7	Mitochondrial ornithine acetyltransferase, catalyzes the fifth step in arginine biosynthesis also possesses acetylglutamate synthase activity, regenerates acetylglutamate while forming ornithine
YDR272W	5.84007	-0.673555	1.61764e-05	0.000582774	0.868486	YDR272W	1025	GLO2	Cytoplasmic glyoxalase II, catalyzes the hydrolysis of S-D-lactoylglutathione into glutathione and D-lactate
YLR256W	7.95062	0.583201	1.64679e-05	0.000589423	0.948482	YLR256W	4709	HAP1	Zinc finger transcription factor involved in the complex regulation of gene expression in response to levels of heme and oxygen the S288C sequence differs from other strain backgrounds due to a Ty1 insertion in the carboxy terminus
YPL282C	0.443274	2.52509	1.66667e-05	0.00059269	0.674439	YPL282C	695	PAU22	Protein of unknown function, member of the seripauperin multigene family encoded mainly in subtelomeric regions identical to Pau21p encodes 2 proteins that are translated from 2 different start codons
YDR403W	2.24493	1.57461	1.6799e-05	0.000593566	0.830706	YDR403W	1811	DIT1	Sporulation-specific enzyme required for spore wall maturation, involved in the production of a soluble LL-dityrosine-containing precursor of the spore wall transcripts accumulate at the time of prospore enclosure
YNL036W	7.23774	-0.884052	1.70608e-05	0.000598977	0.228699	YNL036W	866	NCE103	Carbonic anhydrase poorly transcribed under aerobic conditions and at an undetectable level under anaerobic conditions involved in non-classical protein export pathway
YPR145W	8.2505	0.586874	1.7407e-05	0.000607262	0.932895	YPR145W	1919	ASN1	Asparagine synthetase, isozyme of Asn2p catalyzes the synthesis of L-asparagine from L-aspartate in the asparagine biosynthetic pathway
YML110C	6.01548	1.05504	1.78711e-05	0.000619532	0.120826	YML110C	1124	COQ5	2-hexaprenyl-6-methoxy-1,4-benzoquinone methyltransferase, involved in ubiquinone (Coenzyme Q) biosynthesis localizes to the matrix face of the mitochondrial inner membrane in a large complex with other ubiquinone biosynthetic enzymes
YGL263W	3.40713	1.41676	1.8169e-05	0.000625923	0.407089	YGL263W	1343	COS12	Protein of unknown function, member of the DUP380 subfamily of conserved, often subtelomerically-encoded proteins
YCR097W	6.0337	-0.975193	1.87321e-05	0.000641311	0.175287	YCR097W	687	HMRA1	Silenced copy of a1 at HMR homeobox corepressor that interacts with Alpha2p to repress haploid-specific gene transcription in diploid cells
YCL005W	5.80741	-0.914269	1.9896e-05	0.000666901	0.26112	YCL005W	971	LDB16	Protein of unknown function null mutants have decreased net negative cell surface charge GFP-fusion protein expression is induced in response to the DNA-damaging agent MMS native protein is detected in purified mitochondria
YKR081C	7.23661	0.682144	1.99063e-05	0.000666901	0.665491	YKR081C	1235	RPF2	Essential protein involved in the processing of pre-rRNA and the assembly of the 60S ribosomal subunit interacts with ribosomal protein L11 localizes predominantly to the nucleolus constituent of 66S pre-ribosomal particles
YHR054C	5.21769	0.852388	1.99329e-05	0.000666901	0.536101	YHR054C	1265	YHR054C	Putative protein of unknown function
YDR210C-D/YDR210C-C	8.15909	0.574823	1.99762e-05	0.000666901	0.943941	YDR210C-D/YDR210C-C	5469	YDR210C-D/YDR210C-C	Retrotransposon TYA Gag and TYB Pol genes transcribed/translated as one unit polyprotein is processed to make a nucleocapsid-like protein (Gag), reverse transcriptase (RT), protease (PR), and integrase (IN) similar to retroviral genes/Retrotransposon TYA Gag gene co-transcribed with TYB Pol translated as TYA or TYA-TYB polyprotein Gag is a nucleocapsid protein that is the structural constituent o…
YBR235W	6.34158	0.591304	2.00845e-05	0.000666901	0.966042	YBR235W	3563	YBR235W	Putative ion transporter, similar to mammalian electroneutral Na(+)-(K+)-C1- cotransporter family YBR235W is not an essential gene
YDR461W	10.496	-2.03655	2.06093e-05	0.000676293	0.00102081	YDR461W	311	MFA1	Mating pheromone a-factor, made by a cells interacts with alpha cells to induce cell cycle arrest and other responses leading to mating biogenesis involves C-terminal modification, N-terminal proteolysis, and export also encoded by MFA2
YHR208W	7.92761	0.682737	2.0681e-05	0.000676293	0.630309	YHR208W	1382	BAT1	Mitochondrial branched-chain amino acid (BCAA) aminotransferase, preferentially involved in BCAA biosynthesis homolog of murine ECA39 highly expressed during logarithmic phase and repressed during stationary phase
YHR076W	5.58474	-0.820969	2.07354e-05	0.000676293	0.48262	YHR076W	1325	PTC7	Type 2C protein phosphatase (PP2C) alternatively spliced to create two mRNA isoforms protein from spliced form localizes to the mitochondria while the one from the unspliced form is localized to the nuclear envelope
YML067C	7.00704	-0.636496	2.14259e-05	0.000694703	0.803146	YML067C	1352	ERV41	Protein localized to COPII-coated vesicles, forms a complex with Erv46p involved in the membrane fusion stage of transport has homology to human ERGIC2 (PTX1) protein
YNR010W	4.51587	-0.992144	2.18578e-05	0.000704563	0.470976	YNR010W	650	CSE2	Subunit of the RNA polymerase II mediator complex associates with core polymerase subunits to form the RNA polymerase II holoenzyme component of the Middle domain of mediator required for regulation of RNA polymerase II activity
YDR171W	6.15117	-0.892246	2.21315e-05	0.000709237	0.250636	YDR171W	1328	HSP42	Small heat shock protein (sHSP) with chaperone activity forms barrel-shaped oligomers that suppress unfolded protein aggregation involved in cytoskeleton reorganization after heat shock
YBR012W-B/YBR012W-A	7.09891	0.557953	2.27588e-05	0.000725124	0.974019	YBR012W-B/YBR012W-A	5472	YBR012W-B/YBR012W-A	Retrotransposon TYA Gag and TYB Pol genes transcribed/translated as one unit polyprotein is processed to make a nucleocapsid-like protein (Gag), reverse transcriptase (RT), protease (PR), and integrase (IN) similar to retroviral genes/Retrotransposon TYA Gag gene co-transcribed with TYB Pol translated as TYA or TYA-TYB polyprotein Gag is a nucleocapsid protein that is the structural constituent o…
YOR183W	3.38947	-1.40789	2.28937e-05	0.000725229	0.371328	YOR183W	590	FYV12	Protein of unknown function, required for survival upon exposure to K1 killer toxin
YDL246C	3.33612	1.12458	2.30782e-05	0.000726897	0.818806	YDL246C	1274	SOR2	Protein of unknown function protein sequence is 99% identical to the Sor1p sorbitol dehydrogenase computational analysis of large-scale protein-protein interaction data also suggests a role in fructose or mannose metabolism
YKL189W	5.18338	-1.33039	2.33645e-05	0.000731734	0.0498473	YKL189W	1400	HYM1	Component of the RAM signaling network that is involved in regulation of Ace2p activity and cellular morphogenesis, interacts with Kic1p and Sog2p, localizes to sites of polarized growth during budding and during the mating response
YJR078W/YJR079W	5.38395	0.880048	2.40857e-05	0.000750058	0.387685	YJR078W/YJR079W	2580	BNA2/YJR079W	Putative tryptophan 2,3-dioxygenase or indoleamine 2,3-dioxygenase, required for de novo biosynthesis of NAD from tryptophan via kynurenine interacts genetically with telomere capping gene CDC13 regulated by Hst1p and Aftp/Putative protein of unknown function mutation results in impaired mitochondrial respiration
YCL030C	6.76854	0.843891	2.43709e-05	0.000754677	0.262828	YCL030C	2600	HIS4	Multifunctional enzyme containing phosphoribosyl-ATP pyrophosphatase, phosphoribosyl-AMP cyclohydrolase, and histidinol dehydrogenase activities catalyzes the second, third, ninth and tenth steps in histidine biosynthesis
YBR255C-A	5.241	-0.650472	2.46673e-05	0.000757663	0.962082	YBR255C-A	657	YBR255C-A	Putative protein of unknown function may interact with respiratory chain complexes III (ubiquinol-cytochrome c reductase) or IV (cytochrome c oxidase) identified by sequence comparison with hemiascomycetous yeast species
YJR118C	6.20449	-0.557012	2.47423e-05	0.000757663	0.991639	YJR118C	812	ILM1	Protein of unknown function may be involved in mitochondrial DNA maintenance required for slowed DNA synthesis-induced filamentous growth
YNL192W	5.92569	-1.39224	2.49163e-05	0.000758777	0.0205797	YNL192W	3596	CHS1	Chitin synthase I, requires activation from zymogenic form in order to catalyze the transfer of N-acetylglucosamine (GlcNAc) to chitin required for repairing the chitin septum during cytokinesis transcription activated by mating factor
YLR159W	6.33081	-1.19186	2.62364e-05	0.000794589	0.0405823	YLR159W	545	YLR159W	Putative protein of unknown function YLR156W, YLR159W, and YLR161W are three identical open reading frames encoded near the ribosomal DNA region of chromosome 12
YJR132W	7.2594	-0.691279	2.63906e-05	0.00079489	0.574153	YJR132W	3347	NMD5	Karyopherin, a carrier protein involved in nuclear import of proteins importin beta homolog
YAL040C	7.08806	-0.647076	2.69703e-05	0.000807936	0.732079	YAL040C	1943	CLN3	G1 cyclin involved in cell cycle progression activates Cdc28p kinase to promote the G1 to S phase transition plays a role in regulating transcription of the other G1 cyclins, CLN1 and CLN2 regulated by phosphorylation and proteolysis
YLR156W	6.35603	-1.24626	2.74631e-05	0.000818252	0.0287646	YLR156W	545	YLR156W	Putative protein of unknown function exhibits a two-hybrid interaction with Jsn1p in a large-scale analysis
YJR159W	3.35173	1.03503	2.92532e-05	0.0008669	0.897119	YJR159W	1274	SOR1	Sorbitol dehydrogenase expression is induced in the presence of sorbitol or xylose
YLR332W	6.80952	-1.00939	3.05883e-05	0.000901618	0.0861987	YLR332W	1331	MID2	O-glycosylated plasma membrane protein that acts as a sensor for cell wall integrity signaling and activates the pathway interacts with Rom2p, a guanine nucleotide exchange factor for Rho1p, and with cell integrity pathway protein Zeo1p
YJR017C	7.25889	0.589242	3.15279e-05	0.00092437	0.869354	YJR017C	713	ESS1	Peptidylprolyl-cis/trans-isomerase (PPIase) specific for phosphorylated serine and threonine residues N-terminal to proline regulates phosphorylation of the RNA polymerase II large subunit (Rpo21p) C-terminal domain
YNL323W	5.59369	-0.582821	3.24133e-05	0.000945303	0.986475	YNL323W	1445	LEM3	Membrane protein of the plasma membrane and ER, interacts specifically in vivo with the phospholipid translocase (flippase) Dnf1p involved in translocation of phospholipids and alkylphosphocholine drugs across the plasma membrane
YNL042W-B	3.31478	-1.84886	3.32172e-05	0.000963648	0.0886825	YNL042W-B	458	YNL042W-B	Putative protein of unknown function
YJR016C	7.52589	0.680049	3.36476e-05	0.000968657	0.55799	YJR016C	1958	ILV3	Dihydroxyacid dehydratase, catalyzes third step in the common pathway leading to biosynthesis of branched-chain amino acids
YCR011C	6.96239	0.647232	3.37413e-05	0.000968657	0.692041	YCR011C	3350	ADP1	Putative ATP-dependent permease of the ABC transporter family of proteins
YKR075C	4.64998	-1.07383	3.40409e-05	0.000972193	0.235305	YKR075C	1124	YKR075C	Protein of unknown function similar to YOR062Cp and Reg1p expression regulated by glucose and Rgt1p GFP-fusion protein is induced in response to the DNA-damaging agent MMS
YFL026W	8.12824	-1.33244	3.48847e-05	0.000991157	0.0115812	YFL026W	1496	STE2	Receptor for alpha-factor pheromone seven transmembrane-domain GPCR that interacts with both pheromone and a heterotrimeric G protein to initiate the signaling response that leads to mating between haploid a and alpha cells
YER018C	6.69265	-0.893005	3.58791e-05	0.00101418	0.160522	YER018C	866	SPC25	Component of the evolutionarily conserved kinetochore-associated Ndc80 complex (Ndc80p-Nuf2p-Spc24p-Spc25p) involved in chromosome segregation, spindle checkpoint activity and kinetochore clustering
YPR154W	5.59002	-0.65139	3.79789e-05	0.00106722	0.842198	YPR154W	848	PIN3	Protein that induces appearance of [PIN+] prion when overproduced
YDR380W	5.18731	-1.70663	3.81427e-05	0.00106722	0.0094112	YDR380W	2108	ARO10	Phenylpyruvate decarboxylase, catalyzes decarboxylation of phenylpyruvate to phenylacetaldehyde, which is the first specific step in the Ehrlich pathway
YGL009C	7.54994	0.574718	3.9088e-05	0.00108815	0.872744	YGL009C	2540	LEU1	Isopropylmalate isomerase, catalyzes the second step in the leucine biosynthesis pathway
YDR210W-B/YDR210W-A	6.64917	0.68076	4.08828e-05	0.00113239	0.580291	YDR210W-B/YDR210W-A	5514	YDR210W-B/YDR210W-A	Retrotransposon TYA Gag and TYB Pol genes transcribed/translated as one unit polyprotein is processed to make a nucleocapsid-like protein (Gag), reverse transcriptase (RT), protease (PR), and integrase (IN) similar to retroviral genes/Retrotransposon TYA Gag gene co-transcribed with TYB Pol translated as TYA or TYA-TYB polyprotein Gag is a nucleocapsid protein that is the structural constituent o…
YLR035C-A	7.74157	0.827256	4.21852e-05	0.00116263	0.197114	YLR035C-A	3668	YLR035C-A	Retrotransposon TYA Gag and TYB Pol genes polyprotein is processed to make a nucleocapsid-like protein (Gag), reverse transcriptase (RT), protease (PR), and integrase (IN) YLR035C-A is part of a mutant retrotransposon
YDR043C	4.00859	-1.32268	4.33277e-05	0.00118817	0.161306	YDR043C	896	NRG1	Transcriptional repressor that recruits the Cyc8p-Tup1p complex to promoters mediates glucose repression and negatively regulates a variety of processes including filamentous growth and alkaline pH response
YDR072C	6.37965	-0.744365	4.38648e-05	0.00119695	0.409044	YDR072C	1784	IPT1	Inositolphosphotransferase, involved in synthesis of mannose-(inositol-P)2-ceramide (M(IP)2C), the most abundant sphingolipid , can mutate to resistance to the antifungals syringomycin E and DmAMP1 and to K. lactis zymocin
YOL126C	6.96127	-0.799217	4.41828e-05	0.00119896	0.251215	YOL126C	1334	MDH2	Cytoplasmic malate dehydrogenase, one of three isozymes that catalyze interconversion of malate and oxaloacetate involved in the glyoxylate cycle and gluconeogenesis during growth on two-carbon compounds interacts with Pck1p and Fbp1
YLR304C	8.20365	0.842995	4.43738e-05	0.00119896	0.16977	YLR304C	2537	ACO1	Aconitase, required for the tricarboxylic acid (TCA) cycle and also independently required for mitochondrial genome maintenance phosphorylated component of the mitochondrial nucleoid mutation leads to glutamate auxotrophy
YBR153W	4.395	-0.881621	4.50378e-05	0.00121097	0.6344	YBR153W	935	RIB7	Diaminohydroxyphoshoribosylaminopyrimidine deaminase catalyzes the second step of the riboflavin biosynthesis pathway
YDR476C	7.60928	-0.857979	4.78331e-05	0.00127988	0.152317	YDR476C	875	YDR476C	Putative protein of unknown function green fluorescent protein (GFP)-fusion protein localizes to the endoplasmic reticulum YDR476C is not an essential gene
YAL067C	2.29555	2.10668	4.82515e-05	0.00128484	0.144826	YAL067C	1982	SEO1	Putative permease, member of the allantoate transporter subfamily of the major facilitator superfamily mutation confers resistance to ethionine sulfoxide
YBL107W-A	5.63592	0.69675	4.85003e-05	0.00128526	0.663564	YBL107W-A	305	YBL107W-A	Dubious open reading frame unlikely to encode a protein, based on available experimental and comparative sequence data completely overlaps the Ty2 LTR YBLWdelta2
YAL053W	6.18623	-0.906204	4.94148e-05	0.00130323	0.148409	YAL053W	2552	FLC2	Putative FAD transporter required for uptake of FAD into endoplasmic reticulum involved in cell wall maintenance
YPL089C	5.50071	-0.874279	5.08913e-05	0.00133578	0.265626	YPL089C	2231	RLM1	MADS-box transcription factor, component of the protein kinase C-mediated MAP kinase pathway involved in the maintenance of cell integrity phosphorylated and activated by the MAP-kinase Slt2p
YGL262W	0.629048	2.38679	5.25221e-05	0.00137205	0.542861	YGL262W	728	YGL262W	Putative protein of unknown function null mutant displays elevated sensitivity to expression of a mutant huntingtin fragment or of alpha-synuclein YGL262W is not an essential gene
YPL088W	4.60915	-1.43943	5.27715e-05	0.00137206	0.0367024	YPL088W	1229	YPL088W	Putative aryl alcohol dehydrogenase transcription is activated by paralogous transcription factors Yrm1p and Yrr1p along with genes involved in multidrug resistance
YIL009C-A	5.5018	-0.768898	5.31765e-05	0.00137378	0.461924	YIL009C-A	747	EST3	Component of the telomerase holoenzyme, involved in telomere replication
YER096W	2.99969	1.31361	5.3336e-05	0.00137378	0.571492	YER096W	1739	SHC1	Sporulation-specific activator of Chs3p (chitin synthase III), required for the synthesis of the chitosan layer of ascospores has similarity to Skt5p, which activates Chs3p during vegetative growth transcriptionally induced at alkaline pH
YMR108W	7.58605	0.588181	5.50351e-05	0.00140468	0.765606	YMR108W	2264	ILV2	Acetolactate synthase, catalyses the first common step in isoleucine and valine biosynthesis and is the target of several classes of inhibitors, localizes to the mitochondria expression of the gene is under general amino acid control
YGL047W	5.57796	0.569992	5.50456e-05	0.00140468	0.976316	YGL047W	809	ALG13	Catalytic component of UDP-GlcNAc transferase, required for the second step of dolichyl-linked oligosaccharide synthesis anchored to the ER membrane via interaction with Alg14p similar to bacterial and human glycosyltransferases
YBR016W	8.57242	-0.852975	5.615e-05	0.00142626	0.141439	YBR016W	587	YBR016W	Tail-anchored plasma membrane protein containing a conserved CYSTM module predicted to be palmitoylated has similarity to hydrophilins, which are involved in the adaptive response to hyperosmotic conditions
YLR352W	4.89306	0.65691	5.70471e-05	0.0014424	0.939837	YLR352W	2624	YLR352W	Putative protein of unknown function with similarity to F-box proteins interacts with Skp1p and Cdc53p YLR352W is not an essential gene
YJL038C	2.22978	1.97971	5.86281e-05	0.00147561	0.225857	YJL038C	860	LOH1	Protein of unknown function with proposed roles in maintenance of genome integrity and also in spore wall assembly induced during sporulation repressed during vegetative growth by Sum1p and Hst1p sequence similar to IRC1
YDR014W-A	3.06755	1.24319	5.92252e-05	0.00147805	0.601935	YDR014W-A	689	HED1	Meiosis-specific protein that down-regulates Rad51p-mediated mitotic recombination when the meiotic recombination machinery is impaired early meiotic gene, transcribed specifically during meiotic prophase
YJR069C	6.94929	-0.604086	5.92613e-05	0.00147805	0.723823	YJR069C	794	HAM1	Conserved protein with deoxyribonucleoside triphosphate pyrophosphohydrolase activity, mediates exclusion of noncanonical purines from deoxyribonucleoside triphosphate pools mutant is sensitive to the base analog 6-N-hydroxylaminopurine
YKL149C	6.34565	-0.564337	6.17184e-05	0.00152862	0.895542	YKL149C	1418	DBR1	RNA lariat debranching enzyme, involved in intron turnover required for efficient Ty1 transposition
YPL055C	5.1851	-0.746107	6.19955e-05	0.00152862	0.595517	YPL055C	1199	LGE1	Protein of unknown function null mutant forms abnormally large cells, and homozygous diploid null mutant displays delayed premeiotic DNA synthesis and reduced efficiency of meiotic nuclear division
YBR242W	5.77211	-0.665564	6.21208e-05	0.00152862	0.666474	YBR242W	917	YBR242W	Putative protein of unknown function green fluorescent protein (GFP)-fusion protein localizes to the cytoplasm and nucleus YBR242W is not an essential gene
YHR026W	7.30421	0.528617	6.23993e-05	0.00152864	0.935675	YHR026W	842	VMA16	Subunit c'' of the vacuolar ATPase, which functions in acidification of the vacuole one of three proteolipid subunits of the V0 domain
YMR304C-A/YMR305C	8.73641	-1.01491	6.31021e-05	0.00153902	0.0467444	YMR304C-A/YMR305C	1653	YMR304C-A/SCW10	Dubious open reading frame unlikely to encode a protein, based on available experimental and comparative sequence data partially overlaps the verified gene SCW10/Cell wall protein with similarity to glucanases may play a role in conjugation during mating based on mutant phenotype and its regulation by Ste12p
YGR161C	2.70368	-1.47818	6.39013e-05	0.00154315	0.337481	YGR161C	992	RTS3	Putative component of the protein phosphatase type 2A complex
YEL039C	2.61734	1.62647	6.40853e-05	0.00154315	0.305348	YEL039C	542	CYC7	Cytochrome c isoform 2, expressed under hypoxic conditions electron carrier of the mitochondrial intermembrane space that transfers electrons from ubiquinone-cytochrome c oxidoreductase to cytochrome c oxidase during cellular respiration
YKR046C	4.61509	-1.20692	6.41115e-05	0.00154315	0.0948609	YKR046C	1052	PET10	Protein of unknown function that co-purifies with lipid particles expression pattern suggests a role in respiratory growth computational analysis of large-scale protein-protein interaction data suggests a role in ATP/ADP exchange
YMR052W	3.80716	-0.787715	6.6662e-05	0.00159757	0.983755	YMR052W	815	FAR3	Protein involved in recovery from cell cycle arrest in response to pheromone, in a Far1p-independent pathway interacts with Far7p, Far8p, Far9p, Far10p, and Far11p localizes to the endoplasmic reticulum
YLR191W	4.83084	-0.670043	6.81682e-05	0.00162659	0.89478	YLR191W	1361	PEX13	Integral peroxisomal membrane protein required for translocation of peroxisomal matrix proteins, interacts with the PTS1 signal recognition factor Pex5p and the PTS2 signal recognition factor Pex7p, forms a complex with Pex14p and Pex17p
YDR088C	6.10206	-0.609271	7.02312e-05	0.0016686	0.764948	YDR088C	1349	SLU7	RNA splicing factor, required for ATP-independent portion of 2nd catalytic step of spliceosomal RNA splicing interacts with Prp18p contains zinc knuckle domain
YML079W	6.06331	-0.658049	7.20974e-05	0.00170558	0.60428	YML079W	806	YML079W	Non-essential protein of unknown function with structural resemblance to plant storage and ligand binding proteins (canavalin, glycinin, auxin binding protein) and to some enzymes (epimerase, germin) localizes to the nucleus and cytoplasm
YGL032C	7.3867	-1.16545	7.28736e-05	0.00171658	0.0202846	YGL032C	464	AGA2	Adhesion subunit of a-agglutinin of a-cells, C-terminal sequence acts as a ligand for alpha-agglutinin (Sag1p) during agglutination, modified with O-linked oligomannosyl chains, linked to anchorage subunit Aga1p via two disulfide bonds
YER069W	4.83764	0.724044	7.4973e-05	0.00175852	0.754108	YER069W	2792	ARG5,6	Protein that is processed in the mitochondrion to yield acetylglutamate kinase and N-acetyl-gamma-glutamyl-phosphate reductase, which catalyze the 2nd and 3rd steps in arginine biosynthesis enzymes form a complex with Arg2p
YLR231C	6.46022	-0.860343	7.74605e-05	0.00180916	0.142392	YLR231C	1562	BNA5	Kynureninase, required for the de novo biosynthesis of NAD from tryptophan via kynurenine expression regulated by Hst1p
YBR292C	4.53018	-0.752726	7.88265e-05	0.00182596	0.788809	YBR292C	572	YBR292C	Dubious open reading frame unlikely to encode a protein, based on available experimental and comparative sequence data YBR292C is not an essential gene
YOR220W	5.26684	-1.12857	7.88422e-05	0.00182596	0.0600734	YOR220W	998	RCN2	Protein of unknown function green fluorescent protein (GFP)-fusion protein localizes to the cytoplasm and is induced in response to the DNA-damaging agent MMS phosphorylated in response to alpha factor
YJR011C	5.32746	-0.548723	7.94001e-05	0.00183119	0.990683	YJR011C	986	YJR011C	Putative protein of unknown function GFP-fusion protein expression is induced in response to the DNA-damaging agent MMS
YGR103W	7.94524	0.574118	8.21777e-05	0.00188735	0.731375	YGR103W	2018	NOP7	Component of several different pre-ribosomal particles forms a complex with Ytm1p and Erb1p that is required for maturation of the large ribosomal subunit required for exit from G0 and the initiation of cell proliferation
YJL092W	5.33065	0.63018	8.49272e-05	0.0019424	0.846085	YJL092W	3725	SRS2	DNA helicase and DNA-dependent ATPase involved in DNA repair, needed for proper timing of commitment to meiotic recombination and transition from Meiosis I to II blocks trinucleotide repeat expansion affects genome stability
YJL225C	5.1025	-0.728883	8.97825e-05	0.00203743	0.594106	YJL225C	5865	YJL225C	Putative protein of unknown function similarity to DNA helicases that are also encoded within subtelomeric Y' elements and induced in telomerase deficient survivors
YOR325W	1.21078	-1.85105	8.98213e-05	0.00203743	0.679719	YOR325W	674	YOR325W	Dubious open reading frame unlikely to encode a protein, based on available experimental and comparative sequence data completely overlaps the verified ORF FRT1
YHR185C	2.96435	1.23621	9.08738e-05	0.00205225	0.460542	YHR185C	914	PFS1	Sporulation protein required for prospore membrane formation at selected spindle poles, ensures functionality of all four spindle pole bodies during meiosis II not required for meiotic recombination or meiotic chromosome segregation
YHR146W	8.86	0.685112	9.12505e-05	0.00205225	0.359154	YHR146W	1598	CRP1	Protein that binds to cruciform DNA structures
YOR341W	5.90805	0.807781	9.15918e-05	0.00205225	0.245929	YOR341W	5195	RPA190	RNA polymerase I largest subunit A190
YDR445C	2.67552	-1.35217	9.27227e-05	0.00206918	0.441983	YDR445C	608	YDR445C	Dubious open reading frame unlikely to encode a functional protein, based on available experimental and comparative sequence data
YDR107C	4.23038	0.79969	9.38998e-05	0.002087	0.712972	YDR107C	2219	TMN2	Protein with a role in cellular adhesion and filamentous growth similar to Emp70p and Tmn3p member of the evolutionarily conserved Transmembrane Nine family of proteins with nine membrane-spanning segments
YHR109W	3.61122	-1.05297	9.57469e-05	0.00211951	0.492034	YHR109W	1958	CTM1	Cytochrome c lysine methyltransferase, trimethylates residue 72 of apo-cytochrome c (Cyc1p) in the cytosol not required for normal respiratory growth
YLR356W	5.67795	0.758138	9.61609e-05	0.00212016	0.35691	YLR356W	794	ATG33	Mitochondrial mitophagy-specific protein required primarily for mitophagy induced at the post-log phase not required for other types of selective autophagy or macroautophagy conserved within fungi, but not in higher eukaryotes
YGR030C	5.79708	-0.632637	9.71521e-05	0.00213348	0.683143	YGR030C	677	POP6	Subunit of both RNase MRP and nuclear RNase P RNase MRP cleaves pre-rRNA, while nuclear RNase P cleaves tRNA precursors to generate mature 5' ends and facilitates turnover of nuclear RNAs
YDR091C	5.42636	0.88835	9.80053e-05	0.00214367	0.199312	YDR091C	2027	RLI1	Essential iron-sulfur protein required for ribosome biogenesis and translation initiation and termination facilitates binding of a multifactor complex (MFC) of initiation factors to the small ribosomal subunit predicted ABC family ATPase
YDR251W	8.36402	-0.656826	0.000100028	0.00217926	0.409347	YDR251W	2693	PAM1	Essential protein of unknown function exhibits variable expression during colony morphogenesis overexpression permits survival without protein phosphatase 2A, inhibits growth, and induces a filamentous phenotype
YOR253W	7.39682	-0.524187	0.000101779	0.00220868	0.875778	YOR253W	731	NAT5	Subunit of the N-terminal acetyltransferase NatA (Nat1p, Ard1p, Nat5p) N-terminally acetylates many proteins, which influences multiple processes such as the cell cycle, heat-shock resistance, mating, sporulation, and telomeric silencing
YIL066C	3.70426	0.920933	0.000102551	0.00221672	0.747819	YIL066C	2810	RNR3	Minor isoform of the large subunit of ribonucleotide-diphosphate reductase the RNR complex catalyzes rate-limiting step in dNTP synthesis, regulated by DNA replication and DNA damage checkpoint pathways via localization of small subunits
YKL208W	5.16297	-0.76978	0.000103674	0.00223222	0.423395	YKL208W	1016	CBT1	Protein involved in 5' end processing of mitochondrial COB, 15S_rRNA, and RPM1 transcripts may also have a role in 3' end processing of the COB pre-mRNA displays genetic interaction with cell cycle-regulated kinase Dbf2p
YGR215W	7.69965	-0.680283	0.000105098	0.00224402	0.34664	YGR215W	533	RSM27	Mitochondrial ribosomal protein of the small subunit
YNL132W	6.43649	0.596764	0.000105349	0.00224402	0.693852	YNL132W	3371	KRE33	Essential protein, required for biogenesis of the small ribosomal subunit heterozygous mutant shows haploinsufficiency in K1 killer toxin resistance
YGR231C	6.82689	0.587276	0.000105712	0.00224402	0.68531	YGR231C	1133	PHB2	Subunit of the prohibitin complex (Phb1p-Phb2p), a 1.2 MDa ring-shaped inner mitochondrial membrane chaperone that stabilizes newly synthesized proteins determinant of replicative life span involved in mitochondrial segregation
YKL159C	4.2332	-0.974219	0.00010585	0.00224402	0.3537	YKL159C	836	RCN1	Protein involved in calcineurin regulation during calcium signaling has similarity to H. sapiens DSCR1 which is found in the Down Syndrome candidate region
YDL022W	7.44534	-0.992708	0.000106645	0.00225221	0.0408885	YDL022W	1376	GPD1	NAD-dependent glycerol-3-phosphate dehydrogenase, key enzyme of glycerol synthesis, essential for growth under osmotic stress expression regulated by high-osmolarity glycerol response pathway homolog of Gpd2p
YGL089C	1.29003	2.26231	0.000107345	0.00225834	0.176115	YGL089C	563	MF(ALPHA)2	Mating pheromone alpha-factor, made by alpha cells interacts with mating type a cells to induce cell cycle arrest and other responses leading to mating also encoded by MF(ALPHA)1, which is more highly expressed than MF(ALPHA)2
YER035W	6.80121	-0.638313	0.000110908	0.00231914	0.485516	YER035W	638	EDC2	RNA-binding protein, activates mRNA decapping directly by binding to the mRNA substrate and enhancing the activity of the decapping proteins Dcp1p and Dcp2p has a role in translation during heat stress
YHR020W	6.64084	0.734957	0.000111077	0.00231914	0.288701	YHR020W	2267	YHR020W	Protein of unknown function that may interact with ribosomes, based on co-purification experiments has similarity to proline-tRNA ligase YHR020W is an essential gene
YML042W	4.09272	-1.04963	0.000112332	0.00233302	0.26484	YML042W	2213	CAT2	Carnitine acetyl-CoA transferase present in both mitochondria and peroxisomes, transfers activated acetyl groups to carnitine to form acetylcarnitine which can be shuttled across membranes
YHR182W	5.17726	-0.919079	0.000112588	0.00233302	0.169649	YHR182W	2558	YHR182W	Putative protein of unknown function green fluorescent protein (GFP)-fusion protein localizes to the cell periphery and cytoplasm
YER017C	6.41933	0.545589	0.000114882	0.00236528	0.85755	YER017C	2486	AFG3	Component, with Yta12p, of the mitochondrial inner membrane m-AAA protease that mediates degradation of misfolded or unassembled proteins and is also required for correct assembly of mitochondrial enzyme complexes
YFL053W	0.114635	2.34579	0.000115003	0.00236528	0.48332	YFL053W	1976	DAK2	Dihydroxyacetone kinase, required for detoxification of dihydroxyacetone (DHA) involved in stress adaptation
YLL008W	9.03585	0.944691	0.000119961	0.00244922	0.0517423	YLL008W	2459	DRS1	Nucleolar DEAD-box protein required for ribosome assembly and function, including synthesis of 60S ribosomal subunits constituent of 66S pre-ribosomal particles
YKL065C	8.26637	-0.568416	0.000119973	0.00244922	0.668675	YKL065C	821	YET1	Endoplasmic reticulum transmembrane protein may interact with ribosomes, based on co-purification experiments homolog of human BAP31 protein
YKL103C	7.10473	1.00749	0.00012146	0.00246664	0.0371233	YKL103C	1745	LAP4	Vacuolar aminopeptidase yscI zinc metalloproteinase that belongs to the peptidase family M18 often used as a marker protein in studies of autophagy and cytosol to vacuole targeting (CVT) pathway
YDR326C	4.14136	0.932513	0.000121721	0.00246664	0.459221	YDR326C	4517	YSP2	Protein involved in programmed cell death mutant shows resistance to cell death induced by amiodarone or intracellular acidification
YNL208W	11.8545	-1.13162	0.000124926	0.00251132	0.0253412	YNL208W	800	YNL208W	Protein of unknown function may interact with ribosomes, based on co-purification experiments authentic, non-tagged protein is detected in purified mitochondria in high-throughput studies potential orthologs found in other fungi
YJR045C	11.1229	0.54209	0.000124954	0.00251132	0.876145	YJR045C	2165	SSC1	Hsp70 family ATPase, constituent of the import motor component of the Translocase of the Inner Mitochondrial membrane (TIM23 complex) involved in protein translocation and folding subunit of SceI endonuclease
YIL060W	4.97116	0.741728	0.000125293	0.00251132	0.548365	YIL060W	635	YIL060W	Putative protein of unknown function mutant accumulates less glycogen than does wild type null mutation results in a decrease in plasma membrane electron transport YIL060W is not an essential gene
YNL078W	6.18634	-1.05483	0.000126122	0.00251878	0.0438978	YNL078W	1424	NIS1	Protein localized in the bud neck at G2/M phase physically interacts with septins possibly involved in a mitotic signaling network
YPR094W	4.5691	-0.731138	0.000128031	0.00254769	0.728254	YPR094W	524	RDS3	Component of the SF3b subcomplex of the U2 snRNP, zinc cluster protein involved in pre-mRNA splicing and cycloheximide resistance
YLR161W	6.3267	-1.1477	0.000128686	0.0025515	0.0190759	YLR161W	545	YLR161W	Putative protein of unknown function YLR156W, YLR159W, and YLR161W are three identical open reading frames encoded near the ribosomal DNA region of chromosome 12
YLR404W	4.08798	-0.841016	0.00012926	0.00255369	0.675063	YLR404W	1058	FLD1	Seipin protein involved in lipid droplet morphology, number, and size proposed to be involved in lipid metabolism related to the human BSCL2 which is associated with lipodystrophy
YDL108W	5.06953	-0.600415	0.000131102	0.00256134	0.905246	YDL108W	1202	KIN28	Serine/threonine protein kinase, subunit of the transcription factor TFIIH involved in transcription initiation at RNA polymerase II promoters
YHL002W	7.29711	-0.683315	0.000131378	0.00256134	0.313869	YHL002W	1559	HSE1	Subunit of the endosomal Vps27p-Hse1p complex required for sorting of ubiquitinated membrane proteins into intralumenal vesicles prior to vacuolar degradation, as well as for recycling of Golgi proteins and formation of lumenal membranes
YGL173C	8.29877	0.531954	0.000131774	0.00256134	0.790672	YGL173C	4787	KEM1	Evolutionarily-conserved 5'-3' exonuclease component of cytoplasmic processing (P) bodies involved in mRNA decay plays a role in microtubule-mediated processes, filamentous growth, ribosomal RNA maturation, and telomere maintenance
YLR218C	4.81921	0.750541	0.000131909	0.00256134	0.577138	YLR218C	653	COA4	Twin Cx(9)C protein involved in cytochrome c oxidase assembly or stability localizes to the mitochondrial intermembrane space via the Mia40p-Erv1p system interacts genetically with CYC1 and with cytochrome c oxidase assembly factors
YOL077W-A	7.11261	-0.602592	0.00013197	0.00256134	0.560758	YOL077W-A	407	ATP19	Subunit k of the mitochondrial F1F0 ATP synthase, which is a large enzyme complex required for ATP synthesis associated only with the dimeric form of ATP synthase
YOR385W	3.84673	-1.25412	0.000133095	0.00256712	0.148644	YOR385W	1073	YOR385W	Putative protein of unknown function green fluorescent protein (GFP)-fusion protein localizes to the cytoplasm YOR385W is not an essential gene
YGL127C	6.29152	-0.617328	0.0001332	0.00256712	0.577013	YGL127C	584	SOH1	Subunit of the RNA polymerase II mediator complex associates with core polymerase subunits to form the RNA polymerase II holoenzyme involved in telomere maintenance conserved with other metazoan MED31 subunits
YPL129W	6.76331	-0.540647	0.000133673	0.00256727	0.810334	YPL129W	1040	TAF14	Subunit of TFIID, TFIIF, INO80, SWI/SNF, and NuA3 complexes, involved in RNA polymerase II transcription initiation and in chromatin modification contains a YEATS domain
YMR291W	5.17142	-1.00178	0.000136774	0.00261154	0.0958623	YMR291W	1961	YMR291W	Putative kinase of unknown function green fluorescent protein (GFP)-fusion protein localizes to the cytoplasm and nucleus null mutant is sensitive to expression of the top1-T722A allele not an essential gene
YDL093W	5.49682	0.933688	0.000136926	0.00261154	0.12004	YDL093W	2432	PMT5	Protein O-mannosyltransferase, transfers mannose residues from dolichyl phosphate-D-mannose to protein serine/threonine residues acts in a complex with Pmt3p, can instead interact with Pmt2p in some conditions target for new antifungals
YKL104C	7.90124	-0.796752	0.000137427	0.00261206	0.129214	YKL104C	2354	GFA1	Glutamine-fructose-6-phosphate amidotransferase, catalyzes the formation of glucosamine-6-P and glutamate from fructose-6-P and glutamine in the first step of chitin biosynthesis
YJL093C	5.86596	0.548218	0.000140214	0.00265588	0.878876	YJL093C	2276	TOK1	Outward-rectifier potassium channel of the plasma membrane with two pore domains in tandem, each of which forms a functional channel permeable to potassium carboxy tail functions to prevent inner gate closures target of K1 toxin
YDR374C	1.99085	1.30693	0.000141184	0.00266509	0.793906	YDR374C	1121	YDR374C	Putative protein of unknown function
YMR122W-A	10.6641	-0.866577	0.00014374	0.00270409	0.0995756	YMR122W-A	455	YMR122W-A	Protein of unknown function green fluorescent protein (GFP)-fusion protein localizes to the cytoplasm and endoplasmic reticulum
YFL037W	7.1896	0.568295	0.000145379	0.00272562	0.668382	YFL037W	1574	TUB2	Beta-tubulin associates with alpha-tubulin (Tub1p and Tub3p) to form tubulin dimer, which polymerizes to form microtubules
YJR143C	6.88017	0.664876	0.000146732	0.0027346	0.368726	YJR143C	2489	PMT4	Protein O-mannosyltransferase, transfers mannose residues from dolichyl phosphate-D-mannose to protein serine/threonine residues appears to form homodimers in vivo and does not complex with other Pmt proteins target for new antifungals
YGR218W	6.7825	0.526728	0.000146851	0.0027346	0.84256	YGR218W	3455	CRM1	Major karyopherin, involved in export of proteins, RNAs, and ribosomal subunits from the nucleus exportin
YHL034C	8.48707	-0.502347	0.000147921	0.00274525	0.874008	YHL034C	1085	SBP1	Putative RNA binding protein involved in translational repression and found in cytoplasmic P bodies found associated with small nucleolar RNAs snR10 and snR11
YOL138C	7.94274	0.5512	0.000152656	0.00282362	0.693414	YOL138C	4226	RTC1	Subunit of the SEA (Seh1-associated) complex, a coatomer-related complex that associates dynamically with the vacuole null mutation suppresses cdc13-1 temperature sensitivity has N-terminal WD-40 repeats and a C-terminal RING motif
YPL160W	8.64625	0.513353	0.00015437	0.00284577	0.830304	YPL160W	3473	CDC60	Cytosolic leucyl tRNA synthetase, ligates leucine to the appropriate tRNA
YNL145W	10.4743	-1.74899	0.000155156	0.00285074	0.000791099	YNL145W	317	MFA2	Mating pheromone a-factor, made by a cells interacts with alpha cells to induce cell cycle arrest and other responses leading to mating biogenesis involves C-terminal modification, N-terminal proteolysis, and export also encoded by MFA1
YBR029C	6.42315	0.576068	0.000159271	0.00291662	0.681931	YBR029C	1574	CDS1	Phosphatidate cytidylyltransferase (CDP-diglyceride synthetase) an enzyme that catalyzes that conversion of CTP + phosphate into diphosphate + CDP-diaclglyerol, a critical step in the synthesis of all major yeast phospholipids
YJR082C	6.45017	-0.548862	0.000164499	0.00300237	0.763462	YJR082C	542	EAF6	Subunit of the NuA4 acetyltransferase complex that acetylates histone H4 and NuA3 acetyltransferase complex that acetylates histone H3
YOR229W	6.20148	0.594908	0.000165518	0.003011	0.652475	YOR229W	1604	WTM2	Transcriptional modulator involved in regulation of meiosis, silencing, and expression of RNR genes involved in response to replication stress contains WD repeats
YIR014W	4.8715	1.14106	0.000166472	0.0030184	0.0587297	YIR014W	929	YIR014W	Putative protein of unknown function green fluorescent protein (GFP)-fusion protein localizes to the vacuole expression directly regulated by the metabolic and meiotic transcriptional regulator Ume6p YIR014W is a non-essential gene
YCL035C	6.01485	-0.551133	0.000167457	0.0030263	0.808874	YCL035C	533	GRX1	Hydroperoxide and superoxide-radical responsive heat-stable glutathione-dependent disulfide oxidoreductase with active site cysteine pair protects cells from oxidative damage
YHR174W	12.2428	0.768218	0.000169418	0.00304524	0.236727	YHR174W	1514	ENO2	Enolase II, a phosphopyruvate hydratase that catalyzes the conversion of 2-phosphoglycerate to phosphoenolpyruvate during glycolysis and the reverse reaction during gluconeogenesis expression is induced in response to glucose
YHR074W	6.75898	-0.587315	0.00016961	0.00304524	0.585524	YHR074W	2345	QNS1	Glutamine-dependent NAD(+) synthetase, essential for the formation of NAD(+) from nicotinic acid adenine dinucleotide
YOR375C	8.88477	0.727304	0.000171387	0.00306717	0.192352	YOR375C	1565	GDH1	NADP(+)-dependent glutamate dehydrogenase, synthesizes glutamate from ammonia and alpha-ketoglutarate rate of alpha-ketoglutarate utilization differs from Gdh3p expression regulated by nitrogen and carbon sources
YLR126C	4.5454	-0.802864	0.000171982	0.00306785	0.479627	YLR126C	956	YLR126C	Putative protein of unknown function with similarity to glutamine amidotransferase proteins has Aft1p-binding motif in the promoter may be involved in copper and iron homeostasis YLR126C is not an essential protein
YDR011W	6.46162	0.765102	0.000175683	0.00312375	0.185577	YDR011W	4706	SNQ2	Plasma membrane ATP-binding cassette (ABC) transporter, multidrug transporter involved in multidrug resistance and resistance to singlet oxygen species
YLR342W	4.07785	1.01327	0.000178648	0.00316626	0.253479	YLR342W	5831	FKS1	Catalytic subunit of 1,3-beta-D-glucan synthase, functionally redundant with alternate catalytic subunit Gsc2p binds to regulatory subunit Rho1p involved in cell wall synthesis and maintenance localizes to sites of cell wall remodeling
YBR218C	7.6713	0.528364	0.000181593	0.00320814	0.748493	YBR218C	3743	PYC2	Pyruvate carboxylase isoform, cytoplasmic enzyme that converts pyruvate to oxaloacetate highly similar to isoform Pyc1p but differentially regulated mutations in the human homolog are associated with lactic acidosis
YMR090W	5.16368	-0.762765	0.000184195	0.00324371	0.35919	YMR090W	884	YMR090W	Putative protein of unknown function with similarity to DTDP-glucose 4,6-dehydratases GFP-fusion protein localizes to the cytoplasm up-regulated in response to the fungicide mancozeb not essential for viability
YER084W	3.40533	0.945248	0.000185112	0.00324947	0.728763	YER084W	587	YER084W	Dubious open reading frame unlikely to encode a protein, based on available experimental and comparative sequence data
YDR428C	5.06645	-0.589522	0.000187145	0.00326551	0.885528	YDR428C	986	BNA7	Formylkynurenine formamidase, involved in the de novo biosynthesis of NAD from tryptophan via kynurenine
YDR341C	9.21836	0.514719	0.00018721	0.00326551	0.805796	YDR341C	2024	YDR341C	Arginyl-tRNA synthetase, proposed to be cytoplasmic but the authentic, non-tagged protein is detected in highly purified mitochondria in high-throughput studies
YGL050W	4.56978	-0.889828	0.000198036	0.00344276	0.276361	YGL050W	1022	TYW3	tRNA methyltransferase required for synthesis of wybutosine, a modified guanosine found at the 3'-position adjacent to the anticodon of phenylalanine tRNA which supports reading frame maintenance by stabilizing codon-anticodon interactions
YPL195W	7.22148	0.460709	0.000198621	0.00344276	0.962839	YPL195W	2999	APL5	Delta adaptin-like subunit of the clathrin associated protein complex (AP-3) functions in transport of alkaline phosphatase to the vacuole via the alternate pathway, suppressor of loss of casein kinase 1 function
YBL033C	4.68987	-0.770825	0.000201096	0.00346548	0.469613	YBL033C	1238	RIB1	GTP cyclohydrolase II catalyzes the first step of the riboflavin biosynthesis pathway
YIL064W	6.40372	0.562098	0.000201189	0.00346548	0.689065	YIL064W	974	SEE1	Probable lysine methyltransferase involved in the dimethylation of eEF1A (Tef1p/Tef2p) sequence similarity to S-adenosylmethionine-dependent methyltransferases of the seven beta-strand family role in vesicular transport
YJL138C	9.29207	0.569653	0.000202233	0.00347261	0.579797	YJL138C	1388	TIF2	Translation initiation factor eIF4A, identical to Tif1p DEA(D/H)-box RNA helicase that couples ATPase activity to RNA binding and unwinding forms a dumbbell structure of two compact domains connected by a linker interacts with eIF4G
YOR036W	4.67782	-1.36301	0.000203389	0.00347837	0.0204798	YOR036W	1067	PEP12	Target membrane receptor (t-SNARE) for vesicular intermediates traveling between the Golgi apparatus and the vacuole controls entry of biosynthetic, endocytic, and retrograde traffic into the prevacuolar compartment syntaxin
YKL011C	4.90981	-0.68598	0.00020383	0.00347837	0.616342	YKL011C	1262	CCE1	Mitochondrial cruciform cutting endonuclease, cleaves Holliday junctions formed during recombination of mitochondrial DNA
YGL041W-A	5.89994	-0.580714	0.000206226	0.00350839	0.678784	YGL041W-A	665	YGL041W-A	Putative protein of unknown function, conserved in fungi identified by expression profiling and mass spectrometry
YKR062W	5.47305	-0.542605	0.000211108	0.00358039	0.895017	YKR062W	1187	TFA2	TFIIE small subunit, involved in RNA polymerase II transcription initiation
YPL003W	5.36378	-0.638497	0.000213594	0.00361144	0.601397	YPL003W	1589	ULA1	Protein that acts together with Uba3p to activate Rub1p before its conjugation to proteins (neddylation), which may play a role in protein degradation
YMR116C	10.8944	0.507136	0.00021594	0.00363995	0.884328	YMR116C	1433	ASC1	G-protein beta subunit and guanine nucleotide dissociation inhibitor for Gpa2p ortholog of RACK1 that inhibits translation core component of the small (40S) ribosomal subunit represses Gcn4p in the absence of amino acid starvation
YAL029C	6.49344	0.550284	0.000218259	0.00364324	0.697417	YAL029C	4616	MYO4	One of two type V myosin motors (along with MYO2) involved in actin-based transport of cargos required for mRNA transport, including ASH1 mRNA, and facilitating the growth and movement of ER tubules into the growing bud along with She3p
YNL044W	7.26216	-0.56676	0.0002183	0.00364324	0.570708	YNL044W	810	YIP3	Protein localized to COPII vesicles, proposed to be involved in ER to Golgi transport interacts with members of the Rab GTPase family and Yip1p also interacts with Rtn1p
YIL011W	6.42715	1.18451	0.000218749	0.00364324	0.0127534	YIL011W	1010	TIR3	Cell wall mannoprotein of the Srp1p/Tip1p family of serine-alanine-rich proteins expressed under anaerobic conditions and required for anaerobic growth
YJL133C-A	7.38901	-0.758154	0.000219038	0.00364324	0.139209	YJL133C-A	425	YJL133C-A	Putative protein of unknown function the authentic, non-tagged protein is detected in highly purified mitochondria in high-throughput studies
YER019W	7.83037	-0.846713	0.000219441	0.00364324	0.0685471	YER019W	1634	ISC1	Mitochondrial membrane localized inositol phosphosphingolipid phospholipase C, hydrolyzes complex sphingolipids to produce ceramide activated by phosphatidylserine, cardiolipin, and phosphatidylglycerol mediates Na+ and Li+ halotolerance
YOL082W	5.22961	-0.721627	0.000220824	0.0036552	0.397203	YOL082W	1448	ATG19	Receptor protein specific for the cytoplasm-to-vacuole targeting (Cvt) pathway delivers cargo proteins aminopeptidase I (Lap4p) and alpha-mannosidase (Ams1p) to the phagophore assembly site for packaging into Cvt vesicles
YNL220W	6.87714	0.527791	0.000222233	0.00366751	0.752556	YNL220W	1502	ADE12	Adenylosuccinate synthase, catalyzes the first step in synthesis of adenosine monophosphate from inosine 5'monophosphate during purine nucleotide biosynthesis exhibits binding to single-stranded autonomously replicating (ARS) core sequence
YDR538W	4.85931	-0.654845	0.000224452	0.00369307	0.717514	YDR538W	929	PAD1	Phenylacrylic acid decarboxylase, confers resistance to cinnamic acid, decarboxylates aromatic carboxylic acids to the corresponding vinyl derivatives also has mRNA binding activity homolog of E. coli UbiX
YER183C	5.36705	-0.678412	0.000229941	0.00377213	0.465839	YER183C	836	FAU1	5,10-methenyltetrahydrofolate synthetase, involved in folic acid biosynthesis
YKL195W	5.73816	0.623236	0.000233342	0.00381655	0.549848	YKL195W	1412	MIA40	Essential protein of the mitochondrial intermembrane space (IMS) promotes retention of newly imported proteins may do so by stabilizing client protein folding as part of a disulfide relay system or transferring metal to client proteins
YEL060C	7.40675	-0.900976	0.000236798	0.00386163	0.0455682	YEL060C	2108	PRB1	Vacuolar proteinase B (yscB), a serine protease of the subtilisin family involved in protein degradation in the vacuole and required for full protein degradation during sporulation activity inhibited by Pbi2p
YGR017W	5.49488	-0.544986	0.000238858	0.00388374	0.864112	YGR017W	1094	YGR017W	Putative protein of unknown function green fluorescent protein (GFP)-fusion protein localizes to both the nucleus and the cytoplasm
YNL219C	5.68902	0.604245	0.000240487	0.00389872	0.622659	YNL219C	1868	ALG9	Mannosyltransferase, involved in N-linked glycosylation catalyzes the transfer of mannose from Dol-P-Man to lipid-linked oligosaccharides mutation of the human ortholog causes type 1 congenital disorders of glycosylation
YER185W	4.37322	-1.37134	0.000246139	0.00397864	0.0228737	YER185W	1112	PUG1	Plasma membrane protein with roles in the uptake of protoprophyrin IX and the efflux of heme expression is induced under both low-heme and low-oxygen conditions member of the fungal lipid-translocating exporter (LTE) family of proteins
YPR131C	6.16185	-0.558936	0.000247858	0.00399471	0.678657	YPR131C	788	NAT3	Catalytic subunit of the NatB N-terminal acetyltransferase, which catalyzes acetylation of the amino-terminal methionine residues of all proteins beginning with Met-Asp or Met-Glu and of some proteins beginning with Met-Asn or Met-Met
YMR255W	5.82587	-0.542231	0.000256003	0.00411396	0.79525	YMR255W	767	GFD1	Coiled-coiled protein of unknown function, identified as a high-copy suppressor of a dbp5 mutation
YDL147W	6.48696	0.536856	0.000257322	0.00412313	0.723127	YDL147W	1538	RPN5	Subunit of the COP9 signalosome (CSN) and non-ATPase regulatory subunit of the 26S proteasome lid, similar to mammalian p55 subunit and to another S. cerevisiae regulatory subunit, Rpn7p Rpn5p is an essential protein
YNL322C	6.88144	-0.613756	0.00026065	0.00416436	0.401948	YNL322C	1142	KRE1	Cell wall glycoprotein involved in beta-glucan assembly serves as a K1 killer toxin membrane receptor
YPL226W	7.47132	0.608444	0.000262775	0.00418617	0.392144	YPL226W	3791	NEW1	ATP binding cassette protein that cosediments with polysomes and is required for biogenesis of the small ribosomal subunit Asn/Gln-rich rich region supports [NU+] prion formation and susceptibility to [PSI+] prion induction
YER042W	6.18325	0.662381	0.000265501	0.00421273	0.342154	YER042W	755	MXR1	Methionine-S-sulfoxide reductase, involved in the response to oxidative stress protects iron-sulfur clusters from oxidative inactivation along with MXR2 involved in the regulation of lifespan
YLR120C	4.89046	-0.91747	0.00026597	0.00421273	0.142203	YLR120C	1910	YPS1	Aspartic protease, member of the yapsin family of proteases involved in cell wall growth and maintenance attached to the plasma membrane via a glycosylphosphatidylinositol (GPI) anchor
YMR244W	1.08172	2.36073	0.000270046	0.00425304	0.176643	YMR244W	1268	YMR244W	Putative protein of unknown function
YJR013W	6.29282	-0.630519	0.000270059	0.00425304	0.393199	YJR013W	1412	GPI14	Glycosylphosphatidylinositol-alpha 1,4 mannosyltransferase I, involved in GPI anchor biosynthesis, requires Pbn1p for function homolog of mammalian PIG-M
YCR027C	4.40928	-0.665138	0.000273137	0.00428926	0.838698	YCR027C	830	RHB1	Putative Rheb-related GTPase involved in regulating canavanine resistance and arginine uptake member of the Ras superfamily of G-proteins
YNR031C	6.17285	0.78052	0.000275705	0.00431729	0.143235	YNR031C	4940	SSK2	MAP kinase kinase kinase of the HOG1 mitogen-activated signaling pathway interacts with Ssk1p, leading to autophosphorylation and activation of Ssk2p which phosphorylates Pbs2p also mediates actin cytoskeleton recovery from osmotic stress
YML124C	6.41645	0.562328	0.000277075	0.00432645	0.612879	YML124C	1836	TUB3	Alpha-tubulin associates with beta-tubulin (Tub2p) to form tubulin dimer, which polymerizes to form microtubules expressed at lower level than Tub1p
YDL244W	1.75761	1.52737	0.000278827	0.00434152	0.452933	YDL244W	1223	THI13	Protein involved in synthesis of the thiamine precursor hydroxymethylpyrimidine (HMP) member of a subtelomeric gene family including THI5, THI11, THI12, and THI13
YGR019W	4.18596	0.784652	0.000282576	0.00438466	0.590438	YGR019W	1616	UGA1	Gamma-aminobutyrate (GABA) transaminase (4-aminobutyrate aminotransferase) involved in the 4-aminobutyrate and glutamate degradation pathways required for normal oxidative stress tolerance and nitrogen utilization
YKL027W	7.57705	-0.450208	0.000283189	0.00438466	0.941858	YKL027W	1544	YKL027W	Protein of unknown function, localized to the mitochondrial outer membrane
YBR177C	6.834	-0.52915	0.000293974	0.00453889	0.685457	YBR177C	1556	EHT1	Acyl-coenzymeA:ethanol O-acyltransferase that plays a minor role in medium-chain fatty acid ethyl ester biosynthesis possesses short-chain esterase activity localizes to lipid particles and the mitochondrial outer membrane
YDR031W	4.06733	0.678546	0.000294806	0.00453902	0.905969	YDR031W	566	MIC14	Mitochondrial intermembrane space protein, required for normal oxygen consumption contains twin cysteine-x9-cysteine motifs
YPL093W	6.71651	0.583665	0.000302916	0.0046509	0.485362	YPL093W	2144	NOG1	Putative GTPase that associates with free 60S ribosomal subunits in the nucleolus and is required for 60S ribosomal subunit biogenesis constituent of 66S pre-ribosomal particles member of the ODN family of nucleolar G-proteins
YDL148C	6.33682	0.505525	0.000306683	0.00467915	0.821266	YDL148C	2633	NOP14	Nucleolar protein, forms a complex with Noc4p that mediates maturation and nuclear export of 40S ribosomal subunits also present in the small subunit processome complex, which is required for processing of pre-18S rRNA
YGL211W	5.93226	-0.688681	0.000306769	0.00467915	0.281194	YGL211W	1280	NCS6	Protein required for thiolation of the uridine at the wobble position of Gln, Lys, and Glu tRNAs has a role in urmylation and in invasive and pseudohyphal growth inhibits replication of Brome mosaic virus in S. cerevisiae
YER004W	4.87903	0.710589	0.000307302	0.00467915	0.492693	YER004W	896	FMP52	Protein of unknown function, localized to the mitochondrial outer membrane induced by treatment with 8-methoxypsoralen and UVA irradiation
YGL243W	5.41561	-0.544092	0.000309844	0.00470484	0.838102	YGL243W	1403	TAD1	tRNA-specific adenosine deaminase, deaminates adenosine-37 to inosine in tRNA-Ala
YJL109C	7.73565	0.618342	0.00031092	0.00470822	0.329833	YJL109C	5510	UTP10	Nucleolar protein, component of the small subunit (SSU) processome containing the U3 snoRNA that is involved in processing of pre-18S rRNA mutant has increased aneuploidy tolerance
YPL184C	6.23809	0.493469	0.000315098	0.00475634	0.875099	YPL184C	2039	MRN1	RNA-binding protein proposed to be involved in translational regulation binds specific categories of mRNAs, including those that contain upstream open reading frames (uORFs) and internal ribosome entry sites (IRES)
YDL168W	6.02251	0.682109	0.000315824	0.00475634	0.284433	YDL168W	1361	SFA1	Bifunctional enzyme containing both alcohol dehydrogenase and glutathione-dependent formaldehyde dehydrogenase activities, functions in formaldehyde detoxification and formation of long chain and complex alcohols, regulated by Hog1p-Sko1p
YBL014C	5.54359	0.589853	0.000317104	0.00476261	0.660458	YBL014C	2885	RRN6	Component of the core factor (CF) rDNA transcription factor complex CF is required for transcription of 35S rRNA genes by RNA polymerase I and is composed of Rrn6p, Rrn7p, and Rrn11p
YDR034W-B	4.93782	-1.17112	0.000319913	0.00479175	0.0331112	YDR034W-B	356	YDR034W-B	Predicted tail-anchored plasma membrane protein containing a conserved CYSTM module related proteins in other organisms may be involved in response to stress green fluorescent protein (GFP)-fusion protein localizes to the cell periphery
YOR279C	3.83311	-0.789957	0.000323477	0.004832	0.745272	YOR279C	1133	RFM1	DNA-binding protein required for vegetative repression of middle sporulation genes specificity factor that directs the Hst1p histone deacetylase to some of the promoters regulated by Sum1p involved in telomere maintenance
YCR005C	6.22118	-1.02363	0.000327442	0.004878	0.0227084	YCR005C	1583	CIT2	Citrate synthase, catalyzes the condensation of acetyl coenzyme A and oxaloacetate to form citrate, peroxisomal isozyme involved in glyoxylate cycle expression is controlled by Rtg1p and Rtg2p transcription factors
YJL178C	6.14657	-0.484682	0.000329758	0.00489926	0.897935	YJL178C	1016	ATG27	Type I membrane protein involved in autophagy and the cytoplasm-to-vacuole targeting (Cvt) pathway may be involved in membrane delivery to the phagophore assembly site
YPL061W	8.06675	-1.02577	0.000332224	0.00492264	0.0150164	YPL061W	1703	ALD6	Cytosolic aldehyde dehydrogenase, activated by Mg2+ and utilizes NADP+ as the preferred coenzyme required for conversion of acetaldehyde to acetate constitutively expressed locates to the mitochondrial outer surface upon oxidative stress
YLR189C	4.1524	0.698115	0.000334082	0.00493688	0.813017	YLR189C	3797	ATG26	UDP-glucose:sterol glucosyltransferase, conserved enzyme involved in synthesis of sterol glucoside membrane lipids in contrast to ATG26 from P. pastoris, S. cerevisiae ATG26 is not involved in autophagy
YMR105C	6.20677	-0.919339	0.000350362	0.00515701	0.044164	YMR105C	1910	PGM2	Phosphoglucomutase, catalyzes the conversion from glucose-1-phosphate to glucose-6-phosphate, which is a key step in hexose metabolism functions as the acceptor for a Glc-phosphotransferase
YOR130C	4.79994	-0.733809	0.000350849	0.00515701	0.413536	YOR130C	1079	ORT1	Ornithine transporter of the mitochondrial inner membrane, exports ornithine from mitochondria as part of arginine biosynthesis human ortholog is associated with hyperammonaemia-hyperornithinaemia-homocitrullinuria (HHH) syndrome
YEL042W	7.01249	0.446258	0.000353925	0.00518839	0.942464	YEL042W	1757	GDA1	Guanosine diphosphatase located in the Golgi, involved in the transport of GDP-mannose into the Golgi lumen by converting GDP to GMP after mannose is transferred its substrate
YER181C	4.29001	-1.1407	0.00035899	0.00524868	0.0701207	YER181C	524	YER181C	Dubious open reading frame unlikely to encode a protein, based on available experimental and comparative data extensively overlaps a Ty1 LTR protein product is detected in highly purified mitochondria in high-throughput studies
YDR067C	5.74161	-0.64229	0.000368514	0.00537367	0.387777	YDR067C	875	OCA6	Cytoplasmic protein required for replication of Brome mosaic virus in S. cerevisiae, which is a model system for studying positive-strand RNA virus replication null mutation confers sensitivity to tunicamycin and DTT
YLR355C	9.79947	0.499152	0.000372431	0.00540899	0.751081	YLR355C	1388	ILV5	Bifunctional acetohydroxyacid reductoisomerase and mtDNA binding protein involved in branched-chain amino acid biosynthesis and maintenance of wild-type mitochondrial DNA found in mitochondrial nucleoids
YMR309C	4.98452	0.608983	0.000372898	0.00540899	0.728699	YMR309C	2639	NIP1	eIF3c subunit of the eukaryotic translation initiation factor 3 (eIF3), involved in the assembly of preinitiation complex and start codon selection
YLR043C	8.12421	-0.449076	0.00037605	0.00542505	0.90232	YLR043C	512	TRX1	Cytoplasmic thioredoxin isoenzyme of the thioredoxin system which protects cells against oxidative and reductive stress, forms LMA1 complex with Pbi2p, acts as a cofactor for Tsa1p, required for ER-Golgi transport and vacuole inheritance
YLR212C	6.26205	0.539156	0.000376279	0.00542505	0.661579	YLR212C	1622	TUB4	Gamma-tubulin, involved in nucleating microtubules from both the cytoplasmic and nuclear faces of the spindle pole body
YDL157C	6.28923	0.606503	0.000376958	0.00542505	0.410873	YDL157C	557	YDL157C	Putative protein of unknown function the authentic, non-tagged protein is detected in highly purified mitochondria in high-throughput studies
YDR238C	6.96936	0.425497	0.000381678	0.00547867	0.977505	YDR238C	3122	SEC26	Essential beta-coat protein of the COPI coatomer, involved in ER-to-Golgi protein trafficking and maintenance of normal ER morphology shares 43% sequence identity with mammalian beta-coat protein (beta-COP)
YLR121C	7.49306	-1.3459	0.000383956	0.00549428	0.00214606	YLR121C	1727	YPS3	Aspartic protease, member of the yapsin family of proteases involved in cell wall growth and maintenance attached to the plasma membrane via a glycosylphosphatidylinositol (GPI) anchor
YDR055W	6.46005	-1.51762	0.000384759	0.00549428	0.00159946	YDR055W	1535	PST1	Cell wall protein that contains a putative GPI-attachment site secreted by regenerating protoplasts up-regulated by activation of the cell integrity pathway, as mediated by Rlm1p upregulated by cell wall damage via disruption of FKS1
YDR158W	9.00731	0.668829	0.000388581	0.00553451	0.194068	YDR158W	1298	HOM2	Aspartic beta semi-aldehyde dehydrogenase, catalyzes the second step in the common pathway for methionine and threonine biosynthesis expression regulated by Gcn4p and the general control of amino acid synthesis
YJL045W	2.58968	1.042	0.000393227	0.00558626	0.834586	YJL045W	2105	YJL045W	Minor succinate dehydrogenase isozyme homologous to Sdh1p, the major isozyme reponsible for the oxidation of succinate and transfer of electrons to ubiquinone induced during the diauxic shift in a Cat8p-dependent manner
YLR145W	4.53179	-0.68206	0.000398142	0.00564154	0.646853	YLR145W	806	RMP1	Subunit of RNase MRP, which processes pre-rRNA and has a role in cell cycle-regulated degradation of daughter cell-specific mRNAs unlike most subunits, not shared between RNase MRP and nuclear RNase P
YBR045C	3.63337	0.880612	0.000399843	0.00564487	0.578692	YBR045C	2120	GIP1	Meiosis-specific regulatory subunit of the Glc7p protein phosphatase, regulates spore wall formation and septin organization, required for expression of some late meiotic genes and for normal localization of Glc7p
YNL084C	5.25115	-0.59068	0.000400425	0.00564487	0.660864	YNL084C	1250	END3	EH domain-containing protein involved in endocytosis, actin cytoskeletal organization and cell wall morphogenesis forms a complex with Sla1p and Pan1p
YCL026C-B	5.33997	1.05586	0.000404294	0.00568487	0.0297895	YCL026C-B	782	HBN1	Putative protein of unknown function similar to bacterial nitroreductases green fluorescent protein (GFP)-fusion protein localizes to the cytoplasm and nucleus protein becomes insoluble upon intracellular iron depletion
YMR101C	3.16739	0.953496	0.000407309	0.00571269	0.681049	YMR101C	1232	SRT1	Cis-prenyltransferase involved in synthesis of long-chain dolichols (19-22 isoprene units as opposed to Rer2p which synthesizes shorter-chain dolichols) localizes to lipid bodies transcription is induced during stationary phase
YDR174W	8.61342	-0.612675	0.000408416	0.00571367	0.29168	YDR174W	941	HMO1	Chromatin associated high mobility group (HMG) family member involved in genome maintenance rDNA-binding component of the Pol I transcription system associates with a 5'-3' DNA helicase and Fpr1p, a prolyl isomerase
YGR121C	3.95793	-0.844685	0.00041057	0.00572928	0.487633	YGR121C	1679	MEP1	Ammonium permease belongs to a ubiquitous family of cytoplasmic membrane proteins that transport only ammonium (NH4+) expression is under the nitrogen catabolite repression regulation
YIL038C	6.00826	0.599439	0.000416627	0.00575438	0.460256	YIL038C	2711	NOT3	Subunit of the CCR4-NOT complex, which is a global transcriptional regulator with roles in transcription initiation and elongation and in mRNA degradation
YFR030W	5.35227	0.897854	0.000416782	0.00575438	0.0824189	YFR030W	3308	MET10	Subunit alpha of assimilatory sulfite reductase, which converts sulfite into sulfide
YNL321W	5.97418	0.447769	0.000416891	0.00575438	0.973727	YNL321W	2927	VNX1	Calcium/H+ antiporter localized to the endoplasmic reticulum membrane member of the calcium exchanger (CAX) family potential Cdc28p substrate
YGR001C	6.08816	-0.506028	0.000417098	0.00575438	0.782855	YGR001C	1102	YGR001C	Putative protein of unknown function with similarity to methyltransferase family members green fluorescent protein (GFP)-fusion protein localizes to the cytoplasm required for replication of Brome mosaic virus in S. cerevisiae
YJR137C	4.58402	0.787661	0.000417809	0.00575438	0.34381	YJR137C	4529	MET5	Sulfite reductase beta subunit, involved in amino acid biosynthesis, transcription repressed by methionine
YMR229C	9.03997	0.612848	0.000418633	0.00575438	0.295044	YMR229C	5390	RRP5	RNA binding protein with preference for single stranded tracts of U's involved in synthesis of both 18S and 5.8S rRNAs component of both the ribosomal small subunit (SSU) processosome and the 90S preribosome
YPR122W	6.23944	-0.483035	0.000420198	0.00576152	0.845618	YPR122W	3827	AXL1	Haploid specific endoprotease that performs one of two N-terminal cleavages during maturation of a-factor mating pheromone required for axial budding pattern of haploid cells
YDL135C	6.4908	-0.660091	0.000422368	0.0057769	0.239171	YDL135C	809	RDI1	Rho GDP dissociation inhibitor involved in the localization and regulation of Cdc42p and Rho1p
YOL019W	6.82811	-1.04896	0.000426758	0.00581009	0.0124432	YOL019W	1856	YOL019W	Protein of unknown function green fluorescent protein (GFP)-fusion protein localizes to the cell periphery and vacuole
YBR183W	4.79971	-0.779857	0.000426902	0.00581009	0.279007	YBR183W	1151	YPC1	Alkaline ceramidase that also has reverse (CoA-independent) ceramide synthase activity, catalyzes both breakdown and synthesis of phytoceramide overexpression confers fumonisin B1 resistance
YDL119C	4.41955	-0.654286	0.000434953	0.00590508	0.756474	YDL119C	1124	YDL119C	Putative mitochondrial transport protein GFP-fusion protein is induced in response to the DNA-damaging agent MMS the authentic, non-tagged protein is detected in purified mitochondria
YML047W-A	5.68665	0.673602	0.000440795	0.00596969	0.320331	YML047W-A	566	YML047W-A	Dubious open reading frame unlikely to encode a functional protein, based on available experimental and comparative sequence data
YDL126C	9.50497	0.52605	0.000448354	0.00604171	0.578741	YDL126C	2708	CDC48	ATPase involved in ubiquitin-mediated protein degradation Cdc48p-Npl4p-Ufd1p complex participates in ER-associated degradation (ERAD) while Cdc48p-Npl4p-Vms1p complex participates in mitochondria-associated degradation (MAD) along with Npl4-Ufd1 complex, important for maintaining the cell wall integrity during heat stress to allow G1 progression
YBR142W	5.21438	0.534639	0.000449082	0.00604171	0.866751	YBR142W	2522	MAK5	Essential nucleolar protein, putative DEAD-box RNA helicase required for maintenance of M1 dsRNA virus involved in biogenesis of large (60S) ribosomal subunits
YDL098C	4.58288	-0.764462	0.000449401	0.00604171	0.369259	YDL098C	785	SNU23	Component of U4/U6.U5 snRNP involved in mRNA splicing via spliceosome
YBR162W-A	8.04214	-0.45776	0.000453187	0.00607778	0.835302	YBR162W-A	398	YSY6	Protein whose expression suppresses a secretory pathway mutation in E. coli has similarity to the mammalian RAMP4 protein involved in secretion
YBR222C	7.23491	0.583664	0.000460256	0.0061576	0.365569	YBR222C	1832	PCS60	Peroxisomal protein that binds AMP and mRNA, localizes to both the peroxisomal peripheral membrane and matrix, expression is highly inducible by oleic acid, similar to E. coli long chain acyl-CoA synthetase
YDL234C	5.89544	-0.737656	0.00046272	0.0061737	0.154921	YDL234C	2441	GYP7	GTPase-activating protein for yeast Rab family members including: Ypt7p (most effective), Ypt1p, Ypt31p, and Ypt32p (in vitro) involved in vesicle mediated protein trafficking
YGR240C	7.41627	0.446199	0.000464681	0.0061737	0.888592	YGR240C	3164	PFK1	Alpha subunit of heterooctameric phosphofructokinase involved in glycolysis, indispensable for anaerobic growth, activated by fructose-2,6-bisphosphate and AMP, mutation inhibits glucose induction of cell cycle-related genes
YDR147W	5.85911	-0.553879	0.000464819	0.0061737	0.605545	YDR147W	1805	EKI1	Ethanolamine kinase, primarily responsible for phosphatidylethanolamine synthesis via the CDP-ethanolamine pathway exhibits some choline kinase activity, thus contributing to phosphatidylcholine synthesis via the CDP-choline pathway
YCR014C	5.24154	0.847546	0.000471371	0.00624566	0.115678	YCR014C	1949	POL4	DNA polymerase IV, undergoes pair-wise interactions with Dnl4p-Lif1p and Rad27p to mediate repair of DNA double-strand breaks by non-homologous end joining (NHEJ) homologous to mammalian DNA polymerase beta
YPR151C	4.33101	0.611872	0.000473095	0.00625348	0.908148	YPR151C	821	SUE1	Mitochondrial protein required for degradation of unstable forms of cytochrome c
YOL086W-A	5.01754	-0.645808	0.000475145	0.00626555	0.514632	YOL086W-A	473	YOL086W-A	Putative protein of unknown function mutant in a srs2 mutant background displays MMS hypersensitivity ortholog of human MHF1, a component of the Fanconi anemia (FA) complex that is involved in maintaining genome stability
YPL110C	5.37272	-0.757409	0.000480018	0.00630682	0.183401	YPL110C	3872	GDE1	Glycerophosphocholine (GroPCho) phosphodiesterase hydrolyzes GroPCho to choline and glycerolphosphate, for use as a phosphate source and as a precursor for phosphocholine synthesis may interact with ribosomes
YER090W	8.42889	0.384403	0.000480564	0.00630682	0.997818	YER090W	1724	TRP2	Anthranilate synthase, catalyzes the initial step of tryptophan biosynthesis, forms multifunctional hetero-oligomeric anthranilate synthase:indole-3-glycerol phosphate synthase enzyme complex with Trp3p
YCR012W	12.0718	0.594698	0.000482526	0.00631753	0.465037	YCR012W	1451	PGK1	3-phosphoglycerate kinase, catalyzes transfer of high-energy phosphoryl groups from the acyl phosphate of 1,3-bisphosphoglycerate to ADP to produce ATP key enzyme in glycolysis and gluconeogenesis
YGL206C	6.06142	0.537658	0.000484973	0.00632392	0.630537	YGL206C	5162	CHC1	Clathrin heavy chain, subunit of the major coat protein involved in intracellular protein transport and endocytosis two heavy chains form the clathrin triskelion structural component the light chain (CLC1) is thought to regulate function
YJR142W	5.47189	-0.657281	0.000485308	0.00632392	0.357956	YJR142W	1229	YJR142W	Putative protein of unknown function GST fusion protein is a Dbf2-Mob1 phosphoylation target in a proteome chip analysis synthetic lethal with PH085 deletion plays a role in restricting Ty1 transposition
YGL157W	6.89661	-0.636366	0.000487914	0.00634288	0.240117	YGL157W	1244	ARI1	NADPH-dependent aldehyde reductase, utilizes aromatic and alophatic aldehyde substrates member of the short-chain dehydrogenase/reductase superfamily
YCR071C	4.72354	-0.670762	0.000507016	0.0065757	0.528998	YCR071C	641	IMG2	Mitochondrial ribosomal protein of the large subunit
YLR181C	5.41599	0.697516	0.000515265	0.00665382	0.279214	YLR181C	1193	VTA1	Multivesicular body (MVB) protein involved in endosomal protein sorting regulates Vps4p activity by promoting its oligomerization has an N-terminal Vps60- and Did2- binding domain, a linker region, and a C-terminal Vps4p binding domain
YDL235C	6.37679	-0.535847	0.000515454	0.00665382	0.577198	YDL235C	704	YPD1	Phosphorelay intermediate protein, phosphorylated by the plasma membrane sensor Sln1p in response to osmotic stress and then in turn phosphorylates the response regulators Ssk1p in the cytosol and Skn7p in the nucleus
YOR378W	3.29612	1.07608	0.000518009	0.00667118	0.320036	YOR378W	1748	YOR378W	Putative paralog of ATR1, but not required for boron tolerance member of the DHA2 family of drug:H+ antiporters YOR378W is not an essential gene
YNL100W	4.99806	-0.569086	0.000524945	0.00673186	0.766083	YNL100W	905	AIM37	Putative protein of unknown function non-tagged protein is detected in purified mitochondria null mutant is viable and displays reduced respiratory growth and reduced frequency of mitochondrial genome loss
YBR066C	5.9494	-0.917035	0.00052736	0.00673186	0.039578	YBR066C	863	NRG2	Transcriptional repressor that mediates glucose repression and negatively regulates filamentous growth has similarity to Nrg1p
YMR081C	2.34321	-1.28779	0.00052751	0.00673186	0.402524	YMR081C	1217	ISF1	Serine-rich, hydrophilic protein with similarity to Mbr1p overexpression suppresses growth defects of hap2, hap3, and hap4 mutants expression is under glucose control cotranscribed with NAM7 in a cyp1 mutant
YOL128C	6.03915	-0.545774	0.000527606	0.00673186	0.574887	YOL128C	1328	YGK3	Protein kinase related to mammalian glycogen synthase kinases of the GSK-3 family GSK-3 homologs (Mck1p, Rim11p, Mrk1p, Ygk3p) are involved in control of Msn2p-dependent transcription of stress responsive genes and in protein degradation
YLR197W	7.67564	0.460143	0.000531463	0.00675497	0.800538	YLR197W	1715	NOP56	Essential evolutionarily-conserved nucleolar protein component of the box C/D snoRNP complexes that direct 2'-O-methylation of pre-rRNA during its maturation overexpression causes spindle orientation defects
YDR278C	2.79589	-0.958034	0.000531868	0.00675497	0.806027	YDR278C	518	YDR278C	Dubious open reading frame unlikely to encode a functional protein, based on available experimental and comparative sequence data
YER028C	4.15175	0.700074	0.000533339	0.00675808	0.718431	YER028C	1385	MIG3	Probable transcriptional repressor involved in response to toxic agents such as hydroxyurea that inhibit ribonucleotide reductase phosphorylation by Snf1p or the Mec1p pathway inactivates Mig3p, allowing induction of damage response genes
YOR306C	4.55695	-1.01727	0.000535367	0.00676822	0.0742626	YOR306C	1766	MCH5	Plasma membrane riboflavin transporter facilitates the uptake of vitamin B2 required for FAD-dependent processes sequence similarity to mammalian monocarboxylate permeases, however mutants are not deficient in monocarboxylate transport
YOR057W	5.44433	0.544114	0.000540306	0.00680592	0.724642	YOR057W	1388	SGT1	Cochaperone protein regulates activity of adenylyl cyclase Cyr1p involved in kinetochore complex assembly associates with the SCF (Skp1p/Cdc53p/F box protein) ubiquitin ligase complex acts as a linker between Skp1p and HSP90 complexes
YDR325W	4.3771	0.65373	0.000540819	0.00680592	0.735871	YDR325W	3308	YCG1	Subunit of the condensin complex required for establishment and maintenance of chromosome condensation, chromosome segregation and chromatin binding of the condensin complex required for clustering of tRNA genes at the nucleolus
YDR163W	5.17614	-0.507567	0.000543491	0.00682397	0.906754	YDR163W	728	CWC15	Non-essential protein involved in pre-mRNA splicing, component of a complex containing Cef1p has similarity to S. pombe Cwf15p
YPR194C	2.04623	1.55784	0.000547076	0.00685337	0.22066	YPR194C	2834	OPT2	Oligopeptide transporter member of the OPT family, with potential orthologs in S. pombe and C. albicans also plays a role in formation of mature vacuoles
YLR222C-A/YLR223C	5.56321	0.58168	0.000553465	0.00691768	0.542049	YLR222C-A/YLR223C	3685	YLR222C-A/IFH1	Dubious open reading frame unlikely to encode a protein, based on available experimental and comparative sequence data partially overlaps the verified gene IFH1/Coactivator that regulates transcription of ribosomal protein (RP) genes recruited to RP gene promoters during optimal growth conditions via Fhl1p subunit of CURI, a complex that coordinates RP production and pre-rRNA processing
YJL145W	6.23899	-0.614496	0.000565064	0.00704668	0.310092	YJL145W	1085	SFH5	Non-classical phosphatidylinositol transfer protein (PITP) exhibits PI- but not PC-transfer activity localizes to the peripheral endoplasmic reticulum, cytosol and microsomes similar to Sec14p
YBR158W	8.0693	-1.04544	0.000566935	0.00705405	0.00927	YBR158W	1850	AMN1	Protein required for daughter cell separation, multiple mitotic checkpoints, and chromosome stability contains 12 degenerate leucine-rich repeat motifs expression is induced by the Mitotic Exit Network (MEN)
YOR250C	4.8282	-0.530544	0.000568596	0.00705878	0.923654	YOR250C	1538	CLP1	Subunit of cleavage factor I (CFI), involved in both the endonucleolyitc cleavage and polyadenylation steps of mRNA 3'-end maturation
YOR137C	4.63471	-0.872674	0.000573362	0.00710196	0.156976	YOR137C	2069	SIA1	Protein of unassigned function involved in activation of the Pma1p plasma membrane H+-ATPase by glucose
YIL123W	8.29064	0.707384	0.00057826	0.00711083	0.1095	YIL123W	1631	SIM1	Protein of the SUN family (Sim1p, Uth1p, Nca3p, Sun4p) that may participate in DNA replication, promoter contains SCB regulation box at -300 bp indicating that expression may be cell cycle-regulated
YML078W	7.85956	-0.450712	0.000578934	0.00711083	0.817971	YML078W	749	CPR3	Mitochondrial peptidyl-prolyl cis-trans isomerase (cyclophilin), catalyzes the cis-trans isomerization of peptide bonds N-terminal to proline residues involved in protein refolding after import into mitochondria
YLR100W	6.01685	-0.514356	0.000579632	0.00711083	0.689115	YLR100W	1244	ERG27	3-keto sterol reductase, catalyzes the last of three steps required to remove two C-4 methyl groups from an intermediate in ergosterol biosynthesis mutants are sterol auxotrophs
YGL220W	5.77194	-0.46942	0.000579795	0.00711083	0.898857	YGL220W	563	FRA2	Protein involved in negative regulation of transcription of iron regulon forms an iron independent complex with Fra2p, Grx3p, and Grx4p null mutant fails to repress iron regulon and is sensitive to nickel
YLR146W-A	5.44181	-0.59288	0.000580529	0.00711083	0.524274	YLR146W-A	389	YLR146W-A	Putative protein of unknown function
YPR010C	9.0188	0.470216	0.000595833	0.00728211	0.733011	YPR010C	3812	RPA135	RNA polymerase I second largest subunit A135
YJR095W	2.25985	1.31606	0.000602632	0.00734891	0.456802	YJR095W	1169	SFC1	Mitochondrial succinate-fumarate transporter, transports succinate into and fumarate out of the mitochondrion required for ethanol and acetate utilization
YDR129C	8.77493	-0.566171	0.000604744	0.00735838	0.347624	YDR129C	2240	SAC6	Fimbrin, actin-bundling protein cooperates with Scp1p (calponin/transgelin) in the organization and maintenance of the actin cytoskeleton
YIL157C	6.66997	-0.568765	0.000613188	0.00743175	0.382208	YIL157C	794	COA1	Mitochondrial inner membrane protein required for assembly of the cytochrome c oxidase complex (complex IV) interacts with complex IV assembly factor Shy1p during the early stages of assembly
YNR049C	5.87475	-0.730147	0.00061347	0.00743175	0.140761	YNR049C	833	MSO1	Probable component of the secretory vesicle docking complex, acts at a late step in secretion shows genetic and physical interactions with Sec1p required for prospore membrane formation during sporulation
YER014W	5.71164	0.746453	0.000620063	0.00749514	0.134676	YER014W	1820	HEM14	Protoporphyrinogen oxidase, a mitochondrial enzyme that catalyzes the seventh step in the heme biosynthetic pathway, converting protoporphyrinogen IX to protoporphyrin IX inhibited by diphenyl ether-type herbicides
YGL164C	5.02095	-0.598335	0.000628338	0.00757856	0.613919	YGL164C	1523	YRB30	RanGTP-binding protein, inhibits RanGAP1 (Rna1p)-mediated GTP hydrolysis of RanGTP (Gsp1p) shares similarity to proteins in other fungi but not in higher eukaryotes
YER141W	6.03508	0.598582	0.000642157	0.00772832	0.365332	YER141W	1661	COX15	Protein required for the hydroxylation of heme O to form heme A, which is an essential prosthetic group for cytochrome c oxidase
YML057W	7.28502	-0.489607	0.000645168	0.00774764	0.633853	YML057W	2015	CMP2	Calcineurin A one isoform (the other is CNA1) of the catalytic subunit of calcineurin, a Ca++/calmodulin-regulated protein phosphatase which regulates Crz1p (a stress-response transcription factor), the other calcineurin subunit is CNB1
YGR014W	7.67058	-0.60445	0.000648697	0.00777308	0.248926	YGR014W	4121	MSB2	Mucin family member involved in the Cdc42p- and MAP kinase-dependent filamentous growth signaling pathway also functions as an osmosensor in parallel to the Sho1p-mediated pathway potential Cdc28p substrate
YHR134W	3.13252	-1.03811	0.000653965	0.00781921	0.418311	YHR134W	1010	WSS1	Sumoylated protein that localizes to a single spot on the nuclear periphery of mother cells but not daughters interacts genetically with SMT3 UV-sensitive mutant phenotype and genetic interactions suggest a role in the DNA damage response
YER106W	2.38149	1.28764	0.000659835	0.00787232	0.398308	YER106W	1109	MAM1	Monopolin, kinetochore associated protein involved in chromosome attachment to meiotic spindle
YMR128W	5.95852	0.480812	0.000661871	0.00787956	0.812091	YMR128W	4004	ECM16	Essential DEAH-box ATP-dependent RNA helicase specific to the U3 snoRNP, predominantly nucleolar in distribution, required for 18S rRNA synthesis
YJL071W	4.94367	0.529327	0.000666264	0.00791476	0.88037	YJL071W	1925	ARG2	Acetylglutamate synthase (glutamate N-acetyltransferase), mitochondrial enzyme that catalyzes the first step in the biosynthesis of the arginine precursor ornithine forms a complex with Arg5,6p
YMR191W	4.652	0.709555	0.000668349	0.00791537	0.408713	YMR191W	1322	SPG5	Protein required for survival at high temperature during stationary phase not required for growth on nonfermentable carbon sources
YPL187W	0.470207	2.17278	0.000669188	0.00791537	0.229559	YPL187W	698	MF(ALPHA)1	Mating pheromone alpha-factor, made by alpha cells interacts with mating type a cells to induce cell cycle arrest and other responses leading to mating also encoded by MF(ALPHA)2, although MF(ALPHA)1 produces most alpha-factor
YPL204W	6.01169	-0.562523	0.000671962	0.00793116	0.479275	YPL204W	1685	HRR25	Protein kinase involved in regulating diverse events including vesicular trafficking, DNA repair, and chromosome segregation binds the CTD of RNA pol II homolog of mammalian casein kinase 1delta (CK1delta)
YOR217W	5.79396	0.429361	0.000674255	0.00794122	0.977328	YOR217W	2786	RFC1	Subunit of heteropentameric Replication factor C (RF-C), which is a DNA binding protein and ATPase that acts as a clamp loader of the proliferating cell nuclear antigen (PCNA) processivity factor for DNA polymerases delta and epsilon
YBR137W	5.95218	-0.501446	0.000678182	0.00797044	0.713329	YBR137W	740	YBR137W	Protein of unknown function localized to the cytoplasm binds to Replication Protein A (RPA) also interacts with Sgt2p YBR137W is not an essential gene
YMR315W	7.76832	-0.630035	0.000682828	0.00800467	0.188191	YMR315W	1250	YMR315W	Protein with NADP(H) oxidoreductase activity transcription is regulated by Stb5p in response to NADPH depletion induced by diamide promoter contains a putative Stb5p binding site
YAL014C	6.28343	-0.502246	0.000686897	0.00800467	0.647154	YAL014C	968	SYN8	Endosomal SNARE related to mammalian syntaxin 8
YMR193W	4.65138	-0.660757	0.000686991	0.00800467	0.521346	YMR193W	977	MRPL24	Mitochondrial ribosomal protein of the large subunit
YGR037C	10.432	-0.496769	0.000687937	0.00800467	0.654619	YGR037C	464	ACB1	Acyl-CoA-binding protein, transports newly synthesized acyl-CoA esters from fatty acid synthetase (Fas1p-Fas2p) to acyl-CoA-consuming processes subject to starvation-induced, Grh1p-mediated unconventional secretion
YKL061W	5.3199	-0.754283	0.000688631	0.00800467	0.158231	YKL061W	542	BLI1	Putative protein of unknown function likely member of BLOC complex involved in endosomal cargo sorting green fluorescent protein (GFP)-fusion protein localizes to the endosome
YPL177C	6.06854	-0.643424	0.000689808	0.00800467	0.235367	YPL177C	1121	CUP9	Homeodomain-containing transcriptional repressor of PTR2, which encodes a major peptide transporter imported peptides activate ubiquitin-dependent proteolysis, resulting in degradation of Cup9p and de-repression of PTR2 transcription
YHR092C	5.32367	-0.735189	0.000691878	0.00801183	0.186168	YHR092C	1931	HXT4	High-affinity glucose transporter of the major facilitator superfamily, expression is induced by low levels of glucose and repressed by high levels of glucose
YIL120W	4.00861	-0.727913	0.000695233	0.00803381	0.635348	YIL120W	1892	QDR1	Multidrug transporter of the major facilitator superfamily, required for resistance to quinidine, ketoconazole, fluconazole, and barban
YPR112C	7.64511	0.585289	0.000699723	0.00805816	0.278175	YPR112C	2864	MRD1	Essential conserved protein that is part of the 90S preribosome required for production of 18S rRNA and small ribosomal subunit contains five consensus RNA-binding domains
YAR033W	5.33993	-0.480171	0.000700265	0.00805816	0.910351	YAR033W	905	MST28	Putative integral membrane protein, involved in vesicle formation forms complex with Mst27p member of DUP240 gene family binds COPI and COPII vesicles
YML113W	6.00335	-0.510738	0.00071158	0.00815504	0.648219	YML113W	947	DAT1	DNA binding protein that recognizes oligo(dA).oligo(dT) tracts Arg side chain in its N-terminal pentad Gly-Arg-Lys-Pro-Gly repeat is required for DNA-binding not essential for viability
YBL026W	6.37385	-0.574733	0.000711643	0.00815504	0.370874	YBL026W	616	LSM2	Lsm (Like Sm) protein part of heteroheptameric complexes (Lsm2p-7p and either Lsm1p or 8p): cytoplasmic Lsm1p complex involved in mRNA decay nuclear Lsm8p complex part of U6 snRNP and possibly involved in processing tRNA, snoRNA, and rRNA
YBR043C	5.61647	0.57978	0.000716657	0.00819546	0.47355	YBR043C	2270	QDR3	Multidrug transporter of the major facilitator superfamily, has a role in polyamine homeostasis expression is upregulated under polyamine stress required for resistance to quinidine, barban, cisplatin, and bleomycin
YOR295W	3.47253	-0.820819	0.000719504	0.00821099	0.668849	YOR295W	887	UAF30	Subunit of UAF (upstream activation factor), which is an RNA polymerase I specific transcription stimulatory factor composed of Uaf30p, Rrn5p, Rrn9p, Rrn10p, histones H3 and H4 deletion decreases cellular growth rate
YOL107W	4.24403	-0.623213	0.000744344	0.00847691	0.814965	YOL107W	1229	YOL107W	Putative protein of unknown function green fluorescent protein (GFP)-fusion protein localizes to the cytoplasm and colocalizes in a punctate pattern with the early golgi/COPI vesicles YOL107W is not an essential protein
YJL033W	6.99224	0.541858	0.000752564	0.00855189	0.414771	YJL033W	2513	HCA4	Putative nucleolar DEAD box RNA helicase high-copy number suppression of a U14 snoRNA processing mutant suggests an involvement in 18S rRNA synthesis
YKR069W	4.71929	0.69223	0.000754031	0.00855189	0.404654	YKR069W	1982	MET1	S-adenosyl-L-methionine uroporphyrinogen III transmethylase, involved in the biosynthesis of siroheme, a prosthetic group used by sulfite reductase required for sulfate assimilation and methionine biosynthesis
YLR203C	7.1637	0.551719	0.000762018	0.00862473	0.36764	YLR203C	1511	MSS51	Specific translational activator for the mitochondrial COX1 mRNA loosely associated with the matrix face of the mitochondrial inner membrane influences both COX1 mRNA translation and Cox1p assembly into cytochrome c oxidase
YLL004W	5.46825	-0.517001	0.000774623	0.00874943	0.724159	YLL004W	2051	ORC3	Subunit of the origin recognition complex, which directs DNA replication by binding to replication origins and is also involved in transcriptional silencing
YDR069C	4.39631	0.571359	0.000777096	0.00875149	0.900197	YDR069C	2981	DOA4	Ubiquitin isopeptidase, required for recycling ubiquitin from proteasome-bound ubiquitinated intermediates, acts at the late endosome/prevacuolar compartment to recover ubiquitin from ubiquitinated membrane proteins en route to the vacuole
YLR153C	7.80681	0.411454	0.000779407	0.00875149	0.914948	YLR153C	2252	ACS2	Acetyl-coA synthetase isoform which, along with Acs1p, is the nuclear source of acetyl-coA for histone acetylation mutants affect global transcription required for growth on glucose expressed under anaerobic conditions
YOR374W	5.62438	-0.853515	0.000780947	0.00875149	0.0627664	YOR374W	1760	ALD4	Mitochondrial aldehyde dehydrogenase, required for growth on ethanol and conversion of acetaldehyde to acetate phosphorylated activity is K+ dependent utilizes NADP+ or NAD+ equally as coenzymes expression is glucose repressed
YDR319C	4.21492	-0.748275	0.000781157	0.00875149	0.434012	YDR319C	1025	YDR319C	Putative protein of unknown function, identified as an ortholog of the highly conserved FIT family of proteins involved in triglyceride droplet biosynthesis interacts with Sst2p and Hsp82p in high-throughput two-hybrid screens
YBR199W	5.7701	0.495101	0.000791457	0.0088489	0.74581	YBR199W	1595	KTR4	Putative mannosyltransferase involved in protein glycosylation member of the KRE2/MNT1 mannosyltransferase family
YDR119W-A	1.88539	1.40669	0.000796097	0.00888277	0.453122	YDR119W-A	401	YDR119W-A	Putative protein of unknown function may interact with respiratory chain complexes III (ubiquinol-cytochrome c reductase) or IV (cytochrome c oxidase)
YBR086C	7.80751	0.413341	0.000804285	0.00893897	0.904186	YBR086C	3041	IST2	Plasma membrane protein that may be involved in osmotolerance, localizes to the mother cell in small-budded cells and to the bud in medium- and large-budded cells mRNA is transported to the bud tip by an actomyosin-driven process
YPL015C	5.07009	0.611552	0.000804377	0.00893897	0.509009	YPL015C	1274	HST2	Cytoplasmic member of the silencing information regulator 2 (Sir2) family of NAD(+)-dependent protein deacetylases modulates nucleolar (rDNA) and telomeric silencing possesses NAD(+)-dependent histone deacetylase activity in vitro
YBR301W	3.20334	1.05598	0.000808943	0.0089622	0.326334	YBR301W	563	PAU24	Cell wall mannoprotein with similarity to Tir1p, Tir2p, Tir3p, and Tir4p member of the seripauperin multigene family encoded mainly in subtelomeric regions expressed under anaerobic conditions, completely repressed during aerobic growth
YOR288C	5.08927	-0.63665	0.00080972	0.0089622	0.406165	YOR288C	1157	MPD1	Member of the protein disulfide isomerase (PDI) family interacts with and inhibits the chaperone activity of Cne1p MPD1 overexpression in a pdi1 null mutant suppresses defects in Pdi1p functions such as carboxypeptidase Y maturation
YDR423C	4.37635	-0.691086	0.000817368	0.00902873	0.524912	YDR423C	1430	CAD1	AP-1-like basic leucine zipper (bZIP) transcriptional activator involved in stress responses, iron metabolism, and pleiotropic drug resistance controls a set of genes involved in stabilizing proteins binds consensus sequence TTACTAA
YMR256C	7.83691	-0.53602	0.000821731	0.00905876	0.384433	YMR256C	383	COX7	Subunit VII of cytochrome c oxidase, which is the terminal member of the mitochondrial inner membrane electron transport chain
YNL194C	2.32054	-1.46634	0.000838591	0.00920366	0.137325	YNL194C	1106	YNL194C	Integral membrane protein required for sporulation and plasma membrane sphingolipid content has sequence similarity to SUR7 and FMP45 GFP-fusion protein is induced in response to the DNA-damaging agent MMS
YDL048C	6.81087	-0.562232	0.000838926	0.00920366	0.341921	YDL048C	1673	STP4	Protein containing a Kruppel-type zinc-finger domain has similarity to Stp1p, Stp2p, and Stp3p
YMR295C	10.3456	-0.585713	0.000839884	0.00920366	0.293027	YMR295C	794	YMR295C	Protein of unknown function that associates with ribosomes green fluorescent protein (GFP)-fusion protein localizes to the cell periphery and bud YMR295C is not an essential gene
YGR211W	6.9004	0.563544	0.000847832	0.00927232	0.329446	YGR211W	1661	ZPR1	Essential protein with two zinc fingers, present in the nucleus of growing cells but relocates to the cytoplasm in starved cells via a process mediated by Cpr1p binds to translation elongation factor eEF-1 (Tef1p)
YNL149C	7.20462	-0.465168	0.000851099	0.00928962	0.686748	YNL149C	590	PGA2	Essential protein required for maturation of Gas1p and Pho8p involved in protein trafficking GFP-fusion protein localizes to the ER and YFP-fusion protein to the nuclear envelope-ER network null mutants have a cell separation defect
YIL078W	7.73202	0.501204	0.000855348	0.00930119	0.504474	YIL078W	2405	THS1	Threonyl-tRNA synthetase, essential cytoplasmic protein
YDR183W	4.37772	-0.700759	0.000855534	0.00930119	0.483104	YDR183W	893	PLP1	Protein that interacts with CCT (chaperonin containing TCP-1) complex and has a role in actin and tubulin folding has weak similarity to phosducins, which are G-protein regulators
YCR053W	8.77552	0.47562	0.000859592	0.00932692	0.611706	YCR053W	1745	THR4	Threonine synthase, conserved protein that catalyzes formation of threonine from O-phosphohomoserine expression is regulated by the GCN4-mediated general amino acid control pathway
YIL002W-A	6.90118	-0.50094	0.000869428	0.0094151	0.532254	YIL002W-A	410	YIL002W-A	Putative protein of unknown function identified by expression profiling and mass spectrometry
YOR048C	5.47064	0.48708	0.000871161	0.00941538	0.830799	YOR048C	3221	RAT1	Nuclear 5' to 3' single-stranded RNA exonuclease, involved in RNA metabolism, including rRNA and snRNA processing as well as poly (A+) dependent and independent mRNA transcription termination
YIR005W	4.93812	-0.531071	0.000874346	0.0094313	0.807112	YIR005W	647	IST3	Component of the U2 snRNP, required for the first catalytic step of splicing and for spliceosomal assembly interacts with Rds3p and is required for Mer1p-activated splicing
YDL145C	7.81949	0.448974	0.000883701	0.0095136	0.730978	YDL145C	3806	COP1	Alpha subunit of COPI vesicle coatomer complex, which surrounds transport vesicles in the early secretory pathway
YLR307W	1.04161	1.49069	0.000901372	0.0096791	0.696203	YLR307W	1106	CDA1	Chitin deacetylase, together with Cda2p involved in the biosynthesis ascospore wall component, chitosan required for proper rigidity of the ascospore wall
YJL002C	9.0007	0.373437	0.000902586	0.0096791	0.987541	YJL002C	1631	OST1	Alpha subunit of the oligosaccharyltransferase complex of the ER lumen, which catalyzes asparagine-linked glycosylation of newly synthesized proteins
YMR186W	10.0125	0.545941	0.000906367	0.00968483	0.377118	YMR186W	2318	HSC82	Cytoplasmic chaperone of the Hsp90 family, redundant in function and nearly identical with Hsp82p, and together they are essential expressed constitutively at 10-fold higher basal levels than HSP82 and induced 2-3 fold by heat shock
YJL026W	7.92964	0.349651	0.00090809	0.00968483	0.999658	YJL026W	1400	RNR2	Ribonucleotide-diphosphate reductase (RNR), small subunit the RNR complex catalyzes the rate-limiting step in dNTP synthesis and is regulated by DNA replication and DNA damage checkpoint pathways via localization of the small subunits
YNL130C	7.00265	0.429186	0.000908392	0.00968483	0.841979	YNL130C	1474	CPT1	Cholinephosphotransferase, required for phosphatidylcholine biosynthesis and for inositol-dependent regulation of EPT1 transcription
YDL121C	6.00197	0.457095	0.000919183	0.00978096	0.827785	YDL121C	650	YDL121C	Putative protein of unknown function green fluorescent protein (GFP)-fusion protein localizes to the endoplasmic reticulum YDL121C is not an essential protein
YOR328W	3.69163	0.796487	0.000931465	0.00989255	0.550339	YOR328W	4895	PDR10	ATP-binding cassette (ABC) transporter, multidrug transporter involved in the pleiotropic drug resistance network regulated by Pdr1p and Pdr3p
YNL054W-A	6.57361	0.604752	0.000935095	0.009912	0.238114	YNL054W-A	1523	YNL054W-A	Retrotransposon TYA Gag gene co-transcribed with TYB Pol translated as TYA or TYA-TYB polyprotein Gag is a nucleocapsid protein that is the structural constituent of virus-like particles (VLPs) similar to retroviral Gag
YDL132W	5.29889	0.577216	0.000939146	0.00993584	0.515569	YDL132W	2648	CDC53	Cullin, structural protein of SCF complexes (which also contain Skp1p, Cdc34p, Hrt1p and an F-box protein) involved in ubiquitination SCF promotes the G1-S transition by targeting G1 cyclins and the Cln-CDK inhibitor Sic1p for degradation
YHR083W	6.62353	0.615895	0.000943452	0.00994726	0.212309	YHR083W	1190	SAM35	Essential component of the sorting and assembly machinery (SAM complex or TOB complex) of the mitochondrial outer membrane, which binds precursors of beta-barrel proteins and facilitates their insertion into the outer membrane
YDR217C	7.18948	0.5027	0.000943835	0.00994726	0.500452	YDR217C	4130	RAD9	DNA damage-dependent checkpoint protein, required for cell-cycle arrest in G1/S, intra-S, and G2/M transmits checkpoint signal by activating Rad53p and Chk1p hyperphosphorylated by Mec1p and Tel1p potential Cdc28p substrate
YPL096C-A	6.26917	-0.429346	0.000988028	0.0103931	0.878184	YPL096C-A	407	ERI1	Endoplasmic reticulum membrane protein that binds to and inhibits GTP-bound Ras2p at the ER component of the GPI-GnT complex which catalyzes the first step in GPI-anchor biosynthesis probable homolog of mammalian PIG-Y protein
YOL164W-A	1.10688	-1.35727	0.00099851	0.0104834	0.487938	YOL164W-A	383	YOL164W-A	Putative protein of unknown function identified by fungal homology and RT-PCR
YER150W	4.10968	-0.821788	0.00100079	0.0104874	0.320075	YER150W	647	SPI1	GPI-anchored cell wall protein involved in weak acid resistance basal expression requires Msn2p/Msn4p expression is induced under conditions of stress and during the diauxic shift similar to Sed1p
YGL115W	6.56218	-0.442911	0.00100403	0.0105014	0.787267	YGL115W	1169	SNF4	Activating gamma subunit of the AMP-activated Snf1p kinase complex (contains Snf1p and a Sip1p/Sip2p/Gal83p family member) activates glucose-repressed genes, represses glucose-induced genes role in sporulation, and peroxisome biogenesis
YGL026C	9.13387	0.377532	0.00102205	0.0106542	0.974602	YGL026C	2324	TRP5	Tryptophan synthase, catalyzes the last step of tryptophan biosynthesis regulated by the general control system of amino acid biosynthesis
YPR097W	6.08353	0.477896	0.00102619	0.0106542	0.696411	YPR097W	3422	YPR097W	Protein that contains a Phox homology (PX) domain and binds phosphoinositides the authentic, non-tagged protein is detected in highly purified mitochondria in high-throughput studies
YBR047W	2.58852	0.903829	0.00102777	0.0106542	0.859812	YBR047W	728	FMP23	Putative protein of unknown function proposed to be involved in iron or copper homeostasis the authentic, non-tagged protein is detected in highly purified mitochondria in high-throughput studies
YLR225C	6.29758	-0.618165	0.00102791	0.0106542	0.207455	YLR225C	1424	YLR225C	Putative protein of unknown function green fluorescent protein (GFP)-fusion protein localizes to the cytoplasm YLR225C is not an essential gene
YKL096W	9.49928	-1.51193	0.0010283	0.0106542	0.00044041	YKL096W	920	CWP1	Cell wall mannoprotein that localizes specifically to birth scars of daughter cells, linked to a beta-1,3- and beta-1,6-glucan heteropolymer through a phosphodiester bond required for propionic acid resistance
YDL241W	4.62177	0.778952	0.00103345	0.0106731	0.206004	YDL241W	572	YDL241W	Putative protein of unknown function YDL241W is not an essential gene
YLL041C	2.4037	1.20569	0.00103401	0.0106731	0.394904	YLL041C	1001	SDH2	Iron-sulfur protein subunit of succinate dehydrogenase (Sdh1p, Sdh2p, Sdh3p, Sdh4p), which couples the oxidation of succinate to the transfer of electrons to ubiquinone as part of the TCA cycle and the mitochondrial respiratory chain
YBR166C	4.9797	-0.519003	0.00106412	0.0109634	0.79769	YBR166C	1559	TYR1	Prephenate dehydrogenase involved in tyrosine biosynthesis, expression is dependent on phenylalanine levels
YJL165C	4.56584	-0.58299	0.00107204	0.0110227	0.720747	YJL165C	2768	HAL5	Putative protein kinase overexpression increases sodium and lithium tolerance, whereas gene disruption increases cation and low pH sensitivity and impairs potassium uptake, suggesting a role in regulation of Trk1p and/or Trk2p transporters
YGR264C	6.78497	0.427579	0.00107415	0.0110227	0.831038	YGR264C	2456	MES1	Methionyl-tRNA synthetase, forms a complex with glutamyl-tRNA synthetase (Gus1p) and Arc1p, which increases the catalytic efficiency of both tRNA synthetases also has a role in nuclear export of tRNAs
YKR084C	4.84891	-0.52057	0.00107588	0.0110227	0.835294	YKR084C	2036	HBS1	GTPase with similarity to translation release factors together with binding partner Dom34p, facilitates ribosomal subunit dissociation and peptidyl-tRNA release when translation is stalled genetically implicated in mRNA no-go decay
YOL132W	1.48905	1.34321	0.00109078	0.0111547	0.694819	YOL132W	1616	GAS4	1,3-beta-glucanosyltransferase, involved with Gas2p in spore wall assembly has similarity to Gas1p localizes to the cell wall
YLR022C	5.30407	-0.49911	0.00109913	0.0111819	0.762889	YLR022C	953	SDO1	Essential protein involved in 60S ribosome maturation ortholog of the human protein (SBDS) responsible for autosomal recessive Shwachman-Bodian-Diamond Syndrome highly conserved across archae and eukaryotes
YIL073C	1.40399	-1.2239	0.00109925	0.0111819	0.77269	YIL073C	3218	SPO22	Meiosis-specific protein essential for chromosome synapsis, involved in completion of nuclear divisions during meiosis induced early in meiosis
YEL031W	7.36217	0.486114	0.00109952	0.0111819	0.519777	YEL031W	3848	SPF1	P-type ATPase, ion transporter of the ER membrane involved in ER function and Ca2+ homeostasis required for regulating Hmg2p degradation confers sensitivity to a killer toxin (SMKT) produced by Pichia farinosa KK1
YDR037W	9.88765	0.447174	0.00110549	0.0112177	0.730001	YDR037W	1976	KRS1	Lysyl-tRNA synthetase
YNR002C	2.44393	-1.27462	0.00110712	0.0112177	0.300723	YNR002C	1049	ATO2	Putative transmembrane protein involved in export of ammonia, a starvation signal that promotes cell death in aging colonies phosphorylated in mitochondria member of the TC 9.B.33 YaaH family homolog of Ady2p and Y. lipolytica Gpr1p
YNL088W	7.52623	0.704553	0.00111451	0.0112719	0.0732943	YNL088W	4487	TOP2	Topoisomerase II, relieves torsional strain in DNA by cleaving and re-sealing the phosphodiester backbone of both positively and negatively supercoiled DNA cleaves complementary strands localizes to axial cores in meiosis
YBR241C	5.98691	0.662898	0.00112107	0.0113174	0.152618	YBR241C	1667	YBR241C	Putative transporter, member of the sugar porter family green fluorescent protein (GFP)-fusion protein localizes to the vacuolar membrane YBR241C is not an essential gene
YGR278W	6.41617	-0.581331	0.00113248	0.0113935	0.258927	YGR278W	1934	CWC22	Spliceosome-associated protein that is required for pre-mRNA splicing necessary for Prp2p function at the first catalytic step of splicing has similarity to S. pombe Cwf22p CWC22 is an essential protein
YOR299W/YOR300W	6.07382	-0.439141	0.00113395	0.0113935	0.83801	YOR299W/YOR300W	2649	BUD7/YOR300W	Member of the ChAPs family of proteins (Chs5p-Arf1p-binding proteins: Bch1p, Bch2p, Bud7p, Chs6p), that forms the exomer complex with Chs5p to mediate export of specific cargo proteins, including Chs3p, from the Golgi to the plasma membrane/Dubious open reading frame, unlikely to encode a protein overlaps with verified gene BUD7/YOR299W mutation affects bipolar budding and bud site selection, tho…
YGR087C	1.25971	1.57455	0.0011348	0.0113935	0.388102	YGR087C	1892	PDC6	Minor isoform of pyruvate decarboxylase, decarboxylates pyruvate to acetaldehyde, involved in amino acid catabolism transcription is glucose- and ethanol-dependent, and is strongly induced during sulfur limitation
YKR092C	5.78548	0.644085	0.00113872	0.0114121	0.214385	YKR092C	1421	SRP40	Nucleolar, serine-rich protein with a role in preribosome assembly or transport may function as a chaperone of small nucleolar ribonucleoprotein particles (snoRNPs) immunologically and structurally to rat Nopp140
YOL066C	4.96819	-0.510764	0.00114285	0.0114326	0.807717	YOL066C	1976	RIB2	Bifunctional enzyme with DRAP deaminase and tRNA:pseudouridine synthase activity the deaminase catalyzes the third step in riboflavin biosynthesis and the synthase catalyzes formation of pseudouridine at position 32 in cytoplasmic tRNAs
YJL116C	3.96112	-0.815107	0.00114496	0.011433	0.287152	YJL116C	1214	NCA3	Protein that functions with Nca2p to regulate mitochondrial expression of subunits 6 (Atp6p) and 8 (Atp8p ) of the Fo-F1 ATP synthase member of the SUN family expression induced in cells treated with the mycotoxin patulin
YJR012C	4.44464	-0.622296	0.00116805	0.0116425	0.622801	YJR012C	824	YJR012C	Essential protein of unknown function proposed involvement in transport based on mass spectrometry analysis of copurifying proteins partially overlaps neighboring ORF, GPI14/YJR013W
YIL156W-A/YIL156W-B	8.10361	-0.612732	0.00117694	0.0116961	0.152152	YIL156W-A/YIL156W-B	882	YIL156W-A/YIL156W-B	Dubious open reading frame unlikely to encode a functional protein, based on available experimental and comparative sequence data/Putative protein of unknown function, originally identified based on homology to Ashbya gossypii and other related yeasts
YPR047W	3.04418	0.757392	0.00117767	0.0116961	0.919843	YPR047W	1610	MSF1	Mitochondrial phenylalanyl-tRNA synthetase, active as a monomer, unlike the cytoplasmic subunit which is active as a dimer complexed to a beta subunit dimer similar to the alpha subunit of E. coli phenylalanyl-tRNA synthetase
YKR066C	5.29703	0.671926	0.00119353	0.0118284	0.224716	YKR066C	1286	CCP1	Mitochondrial cytochrome-c peroxidase degrades reactive oxygen species in mitochondria, involved in the response to oxidative stress
YPR052C/YPR053C	9.90275	-0.510574	0.00119529	0.0118284	0.43425	YPR052C/YPR053C	751	NHP6A/YPR053C	High-mobility group (HMG) protein that binds to and remodels nucleosomes involved in recruiting FACT and other chromatin remodelling complexes to the chromosomes functionally redundant with Nhp6Bp homologous to mammalian HMGB1 and HMGB2/Dubious open reading frame unlikely to encode a protein, based on available experimental and comparative sequence data partially overlaps verified gene NHP6A/YPR0…
YOR238W	5.03863	-0.655749	0.00119943	0.0118482	0.293227	YOR238W	1112	YOR238W	Putative protein of unknown function green fluorescent protein (GFP)-fusion protein localizes to the cytoplasm
YNL157W	6.15729	-0.594177	0.00120383	0.0118703	0.254019	YNL157W	707	IGO1	Protein required for initiation of G0 program prevents degradation of nutrient-regulated mRNAs via the 5'-3' mRNA decay pathway phosphorylated by Rim15p GFP protein localizes to the cytoplasm and nucleus similar to Igo2p
YHR031C	5.93059	0.456726	0.00121964	0.0120047	0.791689	YHR031C	2372	RRM3	DNA helicase involved in rDNA replication and Ty1 transposition relieves replication fork pauses at telomeric regions structurally and functionally related to Pif1p
YLR466C-B	4.91367	-0.688557	0.00122965	0.0120743	0.254093	YLR466C-B	317	YLR466C-B	Dubious open reading frame unlikely to encode a protein, based on available experimental and comparative sequence data
YDR539W	4.82585	-0.64994	0.00123109	0.0120743	0.365021	YDR539W	1712	FDC1	Putative phenylacrylic acid decarboxylase essential for the decarboxylation of aromatic carboxylic acids to the corresponding vinyl derivatives homolog of E. coli UbiD GFP-fusion protein localizes to the cytoplasm
YKL138C-A	3.81955	-0.818363	0.00123921	0.0121177	0.358293	YKL138C-A	410	HSK3	Essential subunit of the Dam1 complex (aka DASH complex), couples kinetochores to the force produced by MT depolymerization thereby aiding in chromosome segregation is transferred to the kinetochore prior to mitosis
YKL094W	6.28421	-0.430847	0.00123991	0.0121177	0.826642	YKL094W	1142	YJU3	Monoglyceride lipase (MGL), functional ortholog of mammalian MGL, localizes to lipid particles and membranes, also member of the eukaryotic serine hydrolase family
YCL014W	5.25945	0.520282	0.00124617	0.0121564	0.686018	YCL014W	5111	BUD3	Protein involved in bud-site selection and required for axial budding pattern localizes with septins to bud neck in mitosis and may constitute an axial landmark for next round of budding
YPL271W	8.78831	-0.365376	0.00124998	0.0121564	0.977111	YPL271W	389	ATP15	Epsilon subunit of the F1 sector of mitochondrial F1F0 ATP synthase, which is a large, evolutionarily conserved enzyme complex required for ATP synthesis phosphorylated
YOL032W	4.43516	-0.579756	0.00125048	0.0121564	0.75735	YOL032W	941	OPI10	Protein with a possible role in phospholipid biosynthesis, based on inositol-excreting phenotype of the null mutant and its suppression by exogenous choline
YPL060W	2.60169	-1.22339	0.00126805	0.0122919	0.271292	YPL060W	1442	MFM1	Mitochondrial inner membrane magnesium transporter, involved in maintenance of mitochondrial magnesium concentrations and membrane potential indirectly affects splicing of group II introns functionally and structurally related to Mrs2p
YJR141W	4.40151	-0.602806	0.00126889	0.0122919	0.695197	YJR141W	1244	YJR141W	Essential protein of unknown function
YDL061C	10.6384	-0.417817	0.001272	0.0123005	0.869168	YDL061C	371	RPS29B	Protein component of the small (40S) ribosomal subunit nearly identical to Rps29Ap and has similarity to rat S29 and E. coli S14 ribosomal proteins
YMR083W	8.61403	0.423465	0.00127587	0.0123163	0.757579	YMR083W	1328	ADH3	Mitochondrial alcohol dehydrogenase isozyme III involved in the shuttling of mitochondrial NADH to the cytosol under anaerobic conditions and ethanol production
YJL177W	11.2946	-0.416313	0.00127886	0.0123236	0.905273	YJL177W	1072	RPL17B	Protein component of the large (60S) ribosomal subunit, nearly identical to Rpl17Ap and has similarity to E. coli L22 and rat L17 ribosomal proteins
YBR279W	5.73174	-0.409272	0.00128146	0.0123271	0.960767	YBR279W	1538	PAF1	Component of the Paf1p complex binds to and modulates the activity of RNA polymerases I and II required for expression of a subset of genes, including cell cycle-regulated genes homolog of human PD2/hPAF1 involved in transcription elongation as demonstrated by the G-less-based run-on (GLRO) assay
YDR408C	5.3897	-0.58679	0.00128474	0.012337	0.369332	YDR408C	845	ADE8	Phosphoribosyl-glycinamide transformylase, catalyzes a step in the 'de novo' purine nucleotide biosynthetic pathway
YKL160W	8.02773	-0.612022	0.0012962	0.0124255	0.145252	YKL160W	638	ELF1	Transcription elongation factor that contains a conserved zinc finger domain implicated in the maintenance of proper chromatin structure in actively transcribed regions deletion inhibits Brome mosaic virus (BMV) gene expression
YPL232W	6.21765	-0.505079	0.00131002	0.0125362	0.494403	YPL232W	1073	SSO1	Plasma membrane t-SNARE involved in fusion of secretory vesicles at the plasma membrane and in vesicle fusion during sporulation forms a complex with Sec9p that binds v-SNARE Snc2p syntaxin homolog functionally redundant with Sso2p
YHR193C	9.22506	-0.409314	0.00131432	0.0125555	0.829702	YHR193C	725	EGD2	Alpha subunit of the heteromeric nascent polypeptide-associated complex (NAC) involved in protein sorting and translocation, associated with cytoplasmic ribosomes
YJR092W	4.67361	0.661798	0.00132477	0.0126335	0.382946	YJR092W	4544	BUD4	Involved in bud-site selection and required for the axial budding pattern localizes with septins to bud neck in mitosis and may constitute an axial landmark for next round of budding required for the formation of a double septin ring, and generally for the organization of septin structures potential Cdc28p substrate
YOR049C	1.23511	1.18377	0.00133997	0.0127487	0.817402	YOR049C	1265	RSB1	Suppressor of sphingoid long chain base (LCB) sensitivity of an LCB-lyase mutation putative integral membrane transporter or flippase that may transport LCBs from the cytoplasmic side toward the extracytoplasmic side of the membrane
YBR024W	6.45982	0.460933	0.00134148	0.0127487	0.647915	YBR024W	1106	SCO2	Protein anchored to the mitochondrial inner membrane, similar to Sco1p and may have a redundant function with Sco1p in delivery of copper to cytochrome c oxidase interacts with Cox2p
YEL025C	4.54723	0.509018	0.00135187	0.0127831	0.927052	YEL025C	3767	YEL025C	Putative protein of unknown function green fluorescent protein (GFP)-fusion protein localizes to both the cytoplasm and the nucleus
YDR297W	6.34618	0.423246	0.00135187	0.0127831	0.845199	YDR297W	1250	SUR2	Sphinganine C4-hydroxylase, catalyses the conversion of sphinganine to phytosphingosine in sphingolipid biosyntheis
YAR035W	5.44654	0.756098	0.00135264	0.0127831	0.091262	YAR035W	2264	YAT1	Outer mitochondrial carnitine acetyltransferase, minor ethanol-inducible enzyme involved in transport of activated acyl groups from the cytoplasm into the mitochondrial matrix phosphorylated
YKL003C	6.74108	-0.658711	0.00135437	0.0127831	0.107158	YKL003C	596	MRP17	Mitochondrial ribosomal protein of the small subunit MRP17 exhibits genetic interactions with PET122, encoding a COX3-specific translational activator
YPR109W	5.5584	-0.49981	0.00135929	0.0128075	0.628738	YPR109W	1085	YPR109W	Predicted membrane protein dipoid deletion strain has high budding index
YPL043W	7.5505	0.495361	0.0013719	0.0129043	0.425495	YPL043W	2258	NOP4	Nucleolar protein, essential for processing and maturation of 27S pre-rRNA and large ribosomal subunit biogenesis constituent of 66S pre-ribosomal particles contains four RNA recognition motifs (RRMs)
YHR108W	7.63546	0.424222	0.00139218	0.0130728	0.739779	YHR108W	1958	GGA2	Protein that interacts with and regulates Arf1p and Arf2p in a GTP-dependent manner to facilitate traffic through the late Golgi binds phosphatidylinositol 4-phosphate, which plays a role in TGN localization has homology to gamma-adaptin
YIR027C	3.50264	0.673377	0.00140822	0.0131822	0.872838	YIR027C	1583	DAL1	Allantoinase, converts allantoin to allantoate in the first step of allantoin degradation expression sensitive to nitrogen catabolite repression
YHR032W-A	5.46039	0.449901	0.00140862	0.0131822	0.874894	YHR032W-A	380	YHR032W-A	Dubious open reading frame unlikely to encode a protein, based on available experimental and comparative sequence data partially overlaps the dubious ORF YHR032C-A
YKL088W	5.45872	-0.461182	0.00146008	0.0136407	0.810908	YKL088W	1916	CAB3	Subunit of a phosphopantothenoylcysteine decarboxylase (PPCDC Cab3p, Sis2p, Vhs3p) complex, which catalyzes the third step of coenzyme A biosynthesis null mutant lethality is complemented by E. coli coaBC
YCL017C	6.15835	0.481723	0.00147207	0.0137294	0.580114	YCL017C	1694	NFS1	Cysteine desulfurase involved in iron-sulfur cluster (Fe/S) biogenesis and in thio-modification of mitochondrial and cytoplasmic tRNAs essential protein located predominantly in mitochondria
YJL088W	2.07841	1.24485	0.00149716	0.0139397	0.444811	YJL088W	1217	ARG3	Ornithine carbamoyltransferase (carbamoylphosphate:L-ornithine carbamoyltransferase), catalyzes the sixth step in the biosynthesis of the arginine precursor ornithine
YCR048W	7.32621	0.791418	0.00150242	0.01395	0.0292071	YCR048W	2033	ARE1	Acyl-CoA:sterol acyltransferase, isozyme of Are2p endoplasmic reticulum enzyme that contributes the major sterol esterification activity in the absence of oxygen
YHR192W	5.56844	-0.420896	0.00150519	0.01395	0.930537	YHR192W	1037	YHR192W	Putative protein of unknown function green fluorescent protein (GFP)-fusion protein localizes to the cytoplasm and is induced in response to the DNA-damaging agent MMS
YNL085W	6.74983	0.401518	0.0015061	0.01395	0.874512	YNL085W	2693	MKT1	Protein that forms a complex with Pbp1p that may mediate posttranscriptional regulation of HO involved in propagation of M2 dsRNA satellite of L-A virus allelic variation affects mitochondrial genome stability, drug resistance, and more
YDL173W	5.58918	-0.492999	0.00150838	0.01395	0.628945	YDL173W	1088	PAR32	Putative protein of unknown function hyperphosphorylated upon rapamycin treatment in a Tap42p-dependent manner green fluorescent protein (GFP)-fusion protein localizes to the cytoplasm PAR32 is not an essential gene
YIL177C	5.23818	-0.75845	0.00151159	0.01395	0.0951371	YIL177C	5865	YIL177C	Putative protein of unknown function similarity to DNA helicases that are encoded within subtelomeric Y' elements and induced in telomerase deficient survivors
YPL049C	5.67718	-0.414827	0.00151344	0.01395	0.937518	YPL049C	1559	DIG1	MAP kinase-responsive inhibitor of the Ste12p transcription factor, involved in the regulation of mating-specific genes and the invasive growth pathway related regulators Dig1p and Dig2p bind to Ste12p
YPL032C	7.12786	-0.623005	0.00156084	0.0143511	0.121993	YPL032C	2678	SVL3	Protein of unknown function, mutant phenotype suggests a potential role in vacuolar function green fluorescent protein (GFP)-fusion protein localizes to the cell periphery, cytoplasm, bud, and bud neck
YKR009C	4.86919	-0.590478	0.00156217	0.0143511	0.473922	YKR009C	2903	FOX2	Multifunctional enzyme of the peroxisomal fatty acid beta-oxidation pathway has 3-hydroxyacyl-CoA dehydrogenase and enoyl-CoA hydratase activities
YHR003C	4.77515	-0.536581	0.00156702	0.0143717	0.712845	YHR003C	1490	YHR003C	Protein of unknown function, localized to the mitochondrial outer membrane
YMR072W	7.24752	-0.497199	0.00158133	0.0144581	0.394048	YMR072W	752	ABF2	Mitochondrial DNA-binding protein involved in mitochondrial DNA replication and recombination, member of HMG1 DNA-binding protein family activity may be regulated by protein kinase A phosphorylation
YGL245W	7.40311	0.402	0.00158168	0.0144581	0.823374	YGL245W	2327	GUS1	Glutamyl-tRNA synthetase (GluRS), forms a complex with methionyl-tRNA synthetase (Mes1p) and Arc1p complex formation increases the catalytic efficiency of both tRNA synthetases and ensures their correct localization to the cytoplasm
YGR003W	4.34437	0.505319	0.00160153	0.0146152	0.960601	YGR003W	2435	CUL3	Ubiquitin-protein ligase, forms a complex with Elc1p that polyubiquitylates monoubiquitylated RNA polymerase II to trigger its proteolysis cullin family member with similarity to Cdc53p and human CUL3
YEL027W	9.6257	0.494022	0.00161309	0.0146965	0.416077	YEL027W	683	VMA3	Proteolipid subunit of the vacuolar H(+)-ATPase V0 sector (subunit c dicyclohexylcarbodiimide binding subunit) required for vacuolar acidification and important for copper and iron metal ion homeostasis
YLR276C	5.9912	0.432683	0.00161813	0.0147087	0.808436	YLR276C	1985	DBP9	ATP-dependent RNA helicase of the DEAD-box family involved in biogenesis of the 60S ribosomal subunit
YCR035C	6.73085	-0.342982	0.00162164	0.0147087	0.997581	YCR035C	1385	RRP43	Exosome non-catalytic core component involved in 3'-5' RNA processing and degradation in both the nucleus and the cytoplasm has similarity to E. coli RNase PH and to human hRrp43p (OIP2, EXOSC8)
YKR086W	5.45571	0.45175	0.00162243	0.0147087	0.832925	YKR086W	3416	PRP16	DEAH-box RNA helicase involved in second catalytic step of splicing exhibits ATP-dependent RNA unwinding activity mediates the release of Yju2p and Cwc25p in the second step in the absence of ATP, stabilizes the binding of Cwc25p to the spliceosome in the first catalytic step
YDR168W	6.79903	-0.530288	0.00163451	0.0147938	0.299799	YDR168W	1721	CDC37	Essential Hsp90p co-chaperone necessary for passage through the START phase of the cell cycle stabilizes protein kinase nascent chains and participates along with Hsp90p in their folding
YIL161W	4.47183	-0.579147	0.00164142	0.0148218	0.674567	YIL161W	908	YIL161W	Putative protein of unknown function green fluorescent protein (GFP)-fusion protein localizes to the cytoplasm mRNA is enriched in Scp160p-associated mRNPs YIL161W is a non-essential gene
YHL047C	4.74264	-0.681676	0.00164544	0.0148218	0.261053	YHL047C	2063	ARN2	Transporter, member of the ARN family of transporters that specifically recognize siderophore-iron chelates responsible for uptake of iron bound to the siderophore triacetylfusarinine C
YBL005W	3.08254	-0.795236	0.00164789	0.0148218	0.759965	YBL005W	3131	PDR3	Transcriptional activator of the pleiotropic drug resistance network, regulates expression of ATP-binding cassette (ABC) transporters through binding to cis-acting sites known as PDREs (PDR responsive elements)
YBL022C	6.56701	0.500989	0.00164836	0.0148218	0.415021	YBL022C	3602	PIM1	ATP-dependent Lon protease, involved in degradation of misfolded proteins in mitochondria required for biogenesis and maintenance of mitochondria
YPR009W	5.95097	-0.530613	0.00165418	0.0148499	0.382688	YPR009W	1007	SUT2	Putative transcription factor multicopy suppressor of mutations that cause low activity of the cAMP/protein kinase A pathway highly similar to Sut1p
YHL044W	2.70534	1.11676	0.00165833	0.0148629	0.31308	YHL044W	908	YHL044W	Putative integral membrane protein, member of DUP240 gene family green fluorescent protein (GFP)-fusion protein localizes to the plasma membrane in a punctate pattern
YNL033W	3.01524	-0.996778	0.00166922	0.0149362	0.341728	YNL033W	1055	YNL033W	Putative protein of unknown function
YLL028W	6.3708	0.772749	0.00167633	0.0149756	0.0420693	YLL028W	1961	TPO1	Polyamine transporter that recognizes spermine, putrescine, and spermidine catalyzes uptake of polyamines at alkaline pH and excretion at acidic pH phosphorylation enhances activity and sorting to the plasma membrane
YDL101C	4.96128	0.557262	0.00169534	0.0150925	0.545616	YDL101C	1742	DUN1	Cell-cycle checkpoint serine-threonine kinase required for DNA damage-induced transcription of certain target genes, phosphorylation of Rad55p and Sml1p, and transient G2/M arrest after DNA damage also regulates postreplicative DNA repair
YJR019C	6.38764	-0.59641	0.0016958	0.0150925	0.175197	YJR019C	1250	TES1	Peroxisomal acyl-CoA thioesterase likely to be involved in fatty acid oxidation rather than fatty acid synthesis conserved protein also found in human peroxisomes TES1 mRNA levels increase during growth on fatty acids
YIL023C	6.70761	-0.568423	0.00169763	0.0150925	0.208086	YIL023C	1241	YKE4	Zinc transporter localizes to the ER null mutant is sensitive to calcofluor white, leads to zinc accumulation in cytosol ortholog of the mouse KE4 and member of the ZIP (ZRT, IRT-like Protein) family
YCL051W	3.8598	0.618066	0.00170678	0.0151494	0.83697	YCL051W	1952	LRE1	Protein involved in control of cell wall structure and stress response overproduction confers resistance to cell-wall degrading enzymes exhibits genetic interactions with genes involved in the cell wall integrity pathway
YPL181W	5.84914	-0.547261	0.00171465	0.0151947	0.338704	YPL181W	1721	CTI6	Protein that relieves transcriptional repression by binding to the Cyc8p-Tup1p corepressor and recruiting the SAGA complex to the repressed promoter contains a PHD finger domain
YOL152W	4.58683	-0.489773	0.00176216	0.0155908	0.920666	YOL152W	2063	FRE7	Putative ferric reductase with similarity to Fre2p expression induced by low copper levels
YJR006W	4.69603	0.567521	0.00177146	0.0156479	0.601945	YJR006W	1664	POL31	DNA polymerase III (delta) subunit, essential for cell viability involved in DNA replication and DNA repair
YOL105C	4.61229	-0.570485	0.00177638	0.0156492	0.609042	YOL105C	1871	WSC3	Partially redundant sensor-transducer of the stress-activated PKC1-MPK1 signaling pathway involved in maintenance of cell wall integrity involved in the response to heat shock and other stressors regulates 1,3-beta-glucan synthesis
YKL211C	5.63964	0.470348	0.00177729	0.0156492	0.688089	YKL211C	1655	TRP3	Bifunctional enzyme exhibiting both indole-3-glycerol-phosphate synthase and anthranilate synthase activities, forms multifunctional hetero-oligomeric anthranilate synthase:indole-3-glycerol phosphate synthase enzyme complex with Trp2p
YGL159W	4.10162	-0.577572	0.00179565	0.0157761	0.834074	YGL159W	1313	YGL159W	Putative protein of unknown function deletion mutant has no detectable phenotype
YNL152W	4.47026	-0.545897	0.00179742	0.0157761	0.750061	YNL152W	1430	INN1	Essential protein that associates with the contractile actomyosin ring, required for ingression of the plasma membrane into the bud neck during cytokinesis C2 domain, a membrane targeting module, is required for function
YEL058W	8.3547	-0.464561	0.00180432	0.0158114	0.469242	YEL058W	1874	PCM1	Essential N-acetylglucosamine-phosphate mutase converts GlcNAc-6-P to GlcNAc-1-P, which is a precursor for the biosynthesis of chitin and for the formation of N-glycosylated mannoproteins and glycosylphosphatidylinositol anchors
YMR290C	6.98005	0.46774	0.00180766	0.0158121	0.496978	YMR290C	1718	HAS1	ATP-dependent RNA helicase localizes to both the nuclear periphery and nucleolus highly enriched in nuclear pore complex fractions constituent of 66S pre-ribosomal particles
YJL082W	4.48484	-0.52932	0.00181013	0.0158121	0.817111	YJL082W	2396	IML2	Protein of unknown function the authentic, non-tagged protein is detected in highly purified mitochondria in high-throughput studies
YFR020W	4.7699	-0.65533	0.00182985	0.015959	0.290318	YFR020W	899	YFR020W	Dubious open reading frame unlikely to encode a functional protein, based on available experimental and comparative sequence data
YLL034C	5.90351	0.443237	0.00183751	0.0159793	0.740517	YLL034C	2714	RIX7	Putative ATPase of the AAA family, required for export of pre-ribosomal large subunits from the nucleus distributed between the nucleolus, nucleoplasm, and nuclear periphery depending on growth conditions
YEL033W	5.507	-0.484858	0.00183797	0.0159793	0.644947	YEL033W	620	MTC7	Predicted metabolic role based on network analysis derived from ChIP experiments, a large-scale deletion study and localization of transcription factor binding sites null mutant is sensitive to temperature oscillation in a cdc13-1 mutant
YNR059W	3.35964	-0.981394	0.00185602	0.0161002	0.233801	YNR059W	1943	MNT4	Putative alpha-1,3-mannosyltransferase, not required for protein O-glycosylation
YPL128C	3.89875	0.598682	0.00185772	0.0161002	0.838799	YPL128C	1889	TBF1	Telobox-containing general regulatory factor binds TTAGGG repeats within subtelomeric anti-silencing regions (STARs), blocking silent chromatin propagation binds majority of snoRNA gene promoters, required for full snoRNA expression
YDR368W	6.656	-0.453094	0.00187118	0.0161674	0.568783	YDR368W	1139	YPR1	NADPH-dependent aldo-keto reductase, reduces multiple substrates including 2-methylbutyraldehyde and D,L-glyceraldehyde, expression is induced by osmotic and oxidative stress functionally redundant with other aldo-keto reductases
YML107C	4.16997	-0.58472	0.00187133	0.0161674	0.746738	YML107C	1205	PML39	Protein required for nuclear retention of unspliced pre-mRNAs along with Mlp1p and Pml1p anchored to nuclear pore complex via Mlp1p and Mlp2p found with the subset of nuclear pores farthest from the nucleolus may interact with ribosomes
YOR344C	3.28046	-0.885459	0.00187945	0.0161902	0.412955	YOR344C	1076	TYE7	Serine-rich protein that contains a basic-helix-loop-helix (bHLH) DNA binding motif binds E-boxes of glycolytic genes and contributes to their activation may function as a transcriptional activator in Ty1-mediated gene expression
YKL077W	6.23945	0.40908	0.00188249	0.0161902	0.842209	YKL077W	1379	YKL077W	Putative protein of unknown function green fluorescent protein (GFP)-fusion protein localizes to the vacuole
YHL030W	6.45041	0.424375	0.00188279	0.0161902	0.747511	YHL030W	5807	ECM29	Scaffold protein that assists in association of the proteasome core particle with the regulatory particle degraded by the mature proteasome after assembly contains HEAT-like repeats
YDR222W	5.56109	-0.55661	0.00190598	0.0163443	0.35008	YDR222W	1448	YDR222W	Protein of unknown function green fluorescent protein (GFP)-fusion protein localizes to the cytoplasm in a punctate pattern
YJL034W	8.18266	0.428463	0.00190664	0.0163443	0.625478	YJL034W	2249	KAR2	ATPase involved in protein import into the ER, also acts as a chaperone to mediate protein folding in the ER and may play a role in ER export of soluble proteins regulates the unfolded protein response via interaction with Ire1p
YFL005W	7.09482	-0.620072	0.00191123	0.0163583	0.109821	YFL005W	848	SEC4	Rab family GTPase essential for vesicle-mediated exocytic secretion and autophagy associates with the exocyst component Sec15p and may regulate polarized delivery of transport vesicles to the exocyst at the plasma membrane
YBR300C	1.46999	1.19723	0.00191505	0.0163655	0.677443	YBR300C	698	YBR300C	Dubious open reading frame unlikely to encode a protein, based on available experimental and comparative sequence data partially overlaps the verified gene YBR301W YBR300C is not an essential gene
YKL004W	6.54664	0.431857	0.0019235	0.0163973	0.69321	YKL004W	1406	AUR1	Phosphatidylinositol:ceramide phosphoinositol transferase (IPC synthase), required for sphingolipid synthesis can mutate to confer aureobasidin A resistance
YOR254C	6.63738	-0.436184	0.00192472	0.0163973	0.648421	YOR254C	2192	SEC63	Essential subunit of Sec63 complex (Sec63p, Sec62p, Sec66p and Sec72p) with Sec61 complex, Kar2p/BiP and Lhs1p forms a channel competent for SRP-dependent and post-translational SRP-independent protein targeting and import into the ER
YBL039C/YBL039C-A	6.99756	0.492015	0.00193452	0.0164554	0.385731	YBL039C/YBL039C-A	1940	URA7/YBL039C-A	Major CTP synthase isozyme (see also URA8), catalyzes the ATP-dependent transfer of the amide nitrogen from glutamine to UTP, forming CTP, the final step in de novo biosynthesis of pyrimidines involved in phospholipid biosynthesis/Dubious open reading frame unlikely to encode a protein, based on available experimental and comparative sequence data completely overlaps the verified ORF URA7 identif…
YKL015W	5.25666	0.455844	0.00193785	0.0164583	0.830135	YKL015W	3140	PUT3	Transcriptional activator of proline utilization genes, constitutively binds PUT1 and PUT2 promoter sequences and undergoes a conformational change to form the active state has a Zn(2)-Cys(6) binuclear cluster domain
YOR257W	5.43	-0.497615	0.00195031	0.0165386	0.584896	YOR257W	686	CDC31	Calcium-binding component of the spindle pole body (SPB) half-bridge, required for SPB duplication in mitosis and meiosis II homolog of mammalian centrin binds multiubiquitinated proteins and is involved in proteasomal protein degradation
YPL012W	6.369	0.535485	0.00197443	0.0167111	0.294356	YPL012W	3887	RRP12	Protein required for export of the ribosomal subunits associates with the RNA components of the pre-ribosomes has a role in nuclear import in association with Pse1p contains HEAT-repeats
YGR156W	4.96049	-0.509989	0.00197675	0.0167111	0.67825	YGR156W	1478	PTI1	Essential protein that is a component of CPF (cleavage and polyadenylation factor) involved in 3' end formation of snoRNA and mRNA interacts directly with Pta1p has similarity to mammalian Cleavage-Stimulation Factor CstF-64
YLR248W	7.05842	0.380683	0.00197975	0.0167111	0.887124	YLR248W	2033	RCK2	Protein kinase involved in the response to oxidative and osmotic stress identified as suppressor of S. pombe cell cycle checkpoint mutations similar to CaM (calmodulin) kinases
YLR015W	4.99904	0.465295	0.00201514	0.0169839	0.85715	YLR015W	1718	BRE2	Subunit of COMPASS (Set1C) complex, which methylates Lys4 of histone H3 and functions in silencing at telomeres has a C-terminal Sdc1 Dpy-30 Interaction (SDI) domain that mediates binding to Sdc1p similar to trithorax-group protein ASH2L
YPR035W	8.57424	0.501164	0.00202486	0.0170398	0.315079	YPR035W	1313	GLN1	Glutamine synthetase (GS), synthesizes glutamine from glutamate and ammonia with Glt1p, forms the secondary pathway for glutamate biosynthesis from ammonia expression regulated by nitrogen source and by amino acid limitation
YGL238W	8.17941	0.421206	0.00203355	0.0170868	0.645008	YGL238W	3083	CSE1	Nuclear envelope protein that mediates the nuclear export of importin alpha (Srp1p), homolog of metazoan CAS protein, required for accurate chromosome segregation
YBL076C	8.66594	0.430906	0.00204003	0.0171104	0.598364	YBL076C	3419	ILS1	Cytoplasmic isoleucine-tRNA synthetase, target of the G1-specific inhibitor reveromycin A
YDR304C	8.17238	-0.51474	0.00204352	0.0171104	0.270245	YDR304C	878	CPR5	Peptidyl-prolyl cis-trans isomerase (cyclophilin) of the endoplasmic reticulum, catalyzes the cis-trans isomerization of peptide bonds N-terminal to proline residues transcriptionally induced in response to unfolded proteins in the ER
YDR182W-A	2.53855	0.96026	0.00204568	0.0171104	0.593158	YDR182W-A	404	YDR182W-A	Putative protein of unknown function identified by fungal homology and RT-PCR
YDL171C	5.45725	0.553683	0.00205224	0.0171307	0.364832	YDL171C	6638	GLT1	NAD(+)-dependent glutamate synthase (GOGAT), synthesizes glutamate from glutamine and alpha-ketoglutarate with Gln1p, forms the secondary pathway for glutamate biosynthesis from ammonia expression regulated by nitrogen source
YKL206C	5.4489	-0.475705	0.00205951	0.0171307	0.648823	YKL206C	1004	ADD66	Protein involved in 20S proteasome assembly forms a heterodimer with Pba1p that binds to proteasome precursors similar to human PAC2 constituent of the PAC1-PAC2 complex involved in proteasome assembly
YIR024C	4.27818	-0.669323	0.00206003	0.0171307	0.411425	YIR024C	851	YIR024C	Protein of unknown function the authentic, non-tagged protein is detected in highly purified mitochondria in high-throughput studies interacts with Arh1p, a mitochondrial oxidoreductase deletion mutant has a respiratory growth defect
YJR064W	6.58785	0.490736	0.00206053	0.0171307	0.40648	YJR064W	1889	CCT5	Subunit of the cytosolic chaperonin Cct ring complex, related to Tcp1p, required for the assembly of actin and tubulins in vivo
YER159C	6.98155	-0.382135	0.00212498	0.0175869	0.862645	YER159C	629	BUR6	Subunit of a heterodimeric NC2 transcription regulator complex with Ncb2p complex binds to TBP and can repress transcription by preventing preinitiation complex assembly or stimulate activated transcription homologous to human NC2alpha
YFR032C-B	2.33629	-0.793709	0.00212905	0.0175869	0.992501	YFR032C-B	464	YFR032C-B	Putative protein of unknown function identified by gene-trapping, microarray-based expression analysis, and genome-wide homology searching
YIL083C	5.79696	-0.635738	0.00213018	0.0175869	0.135339	YIL083C	1298	CAB2	Probable phosphopantothenoylcysteine synthetase (PPCS), which catalyzes the second step of coenzyme A biosynthesis from pantothenate null mutant lethality is complemented by E. coli coaBC (encoding a bifunctional enzyme with PPCS activity)
YLR150W	10.4947	0.356718	0.00213124	0.0175869	0.975715	YLR150W	1022	STM1	Protein required for optimal translation under nutrient stress perturbs association of Yef3p with ribosomes involved in TOR signaling binds G4 quadruplex and purine motif triplex nucleic acid helps maintain telomere structure
YKL071W	2.35477	0.999772	0.00213204	0.0175869	0.641242	YKL071W	971	YKL071W	Putative protein of unknown function expression induced in cells treated with the mycotoxin patulin, and also the quinone methide triterpene celastrol green fluorescent protein (GFP)-fusion protein localizes to the cytoplasm
YAL023C	8.26555	0.358085	0.00213455	0.0175869	0.933292	YAL023C	2480	PMT2	Protein O-mannosyltransferase, transfers mannose residues from dolichyl phosphate-D-mannose to protein Ser/Thr residues involved in ER quality control acts in a complex with Pmt1p, can instead interact with Pmt5 target for new antifungal
YCR007C	3.21587	-0.964744	0.00214288	0.0176292	0.246611	YCR007C	920	YCR007C	Putative integral membrane protein, member of DUP240 gene family YCR007C is not an essential gene
YGL194C	6.01599	-0.387392	0.00215981	0.017742	0.91819	YGL194C	1559	HOS2	Histone deacetylase required for gene activation via specific deacetylation of lysines in H3 and H4 histone tails subunit of the Set3 complex, a meiotic-specific repressor of sporulation specific genes that contains deacetylase activity
YNL211C	4.51411	-0.65131	0.00216315	0.017743	0.348659	YNL211C	461	YNL211C	Putative protein of unknown function green fluorescent protein (GFP)-fusion protein localizes to mitochondria YNL211C is not an essential gene
YJL219W	3.49977	-1.07909	0.00217986	0.0178313	0.0786611	YJL219W	1904	HXT9	Putative hexose transporter that is nearly identical to Hxt11p, has similarity to major facilitator superfamily (MFS) transporters, expression of HXT9 is regulated by transcription factors Pdr1p and Pdr3p
YJL050W	7.24107	0.372315	0.00218038	0.0178313	0.893209	YJL050W	3422	MTR4	ATP-dependent 3'-5' RNA helicase of the Dead-box family, involved in nuclear RNA processing and degradation both as a component of the TRAMP complex and in TRAMP independent processes has a KOW domain that shows RNA binding activity
YOR292C	5.37368	0.40099	0.00219432	0.0178779	0.958673	YOR292C	1130	YOR292C	Putative protein of unknown function green fluorescent protein (GFP)-fusion protein localizes to the vacuole YOR292C is not an essential gene
YOR208W	6.52083	-0.606856	0.00219525	0.0178779	0.128192	YOR208W	2453	PTP2	Phosphotyrosine-specific protein phosphatase involved in the inactivation of mitogen-activated protein kinase (MAPK) during osmolarity sensing dephosporylates Hog1p MAPK and regulates its localization localized to the nucleus
YOR023C	5.24949	-0.483391	0.00219581	0.0178779	0.667962	YOR023C	1901	AHC1	Subunit of the Ada histone acetyltransferase complex, required for structural integrity of the complex
YER087W	4.02594	-0.561358	0.00221189	0.0179822	0.871095	YER087W	1931	AIM10	Protein with similarity to tRNA synthetases non-tagged protein is detected in purified mitochondria null mutant is viable and displays elevated frequency of mitochondrial genome loss
YIL075C	9.5803	0.40834	0.00221956	0.0179958	0.723011	YIL075C	3038	RPN2	Subunit of the 26S proteasome, substrate of the N-acetyltransferase Nat1p
YEL003W	6.83947	-0.431188	0.00222009	0.0179958	0.618462	YEL003W	624	GIM4	Subunit of the heterohexameric cochaperone prefoldin complex which binds specifically to cytosolic chaperonin and transfers target proteins to it
YOR100C	1.22109	1.17855	0.00224559	0.0181757	0.798036	YOR100C	1184	CRC1	Mitochondrial inner membrane carnitine transporter, required for carnitine-dependent transport of acetyl-CoA from peroxisomes to mitochondria during fatty acid beta-oxidation
YDR268W	5.07331	0.492673	0.00225285	0.0182077	0.684172	YDR268W	1340	MSW1	Mitochondrial tryptophanyl-tRNA synthetase
YPR171W	4.86689	-0.407165	0.00226079	0.0182452	0.993069	YPR171W	1931	BSP1	Adapter that links synaptojanins Inp52p and Inp53p to the cortical actin cytoskeleton
YHL009C	4.16412	-0.60354	0.0022784	0.0183604	0.636431	YHL009C	1193	YAP3	Basic leucine zipper (bZIP) transcription factor
YOL060C	4.94741	0.547558	0.00233171	0.0187382	0.503655	YOL060C	2321	MAM3	Protein required for normal mitochondrial morphology, has similarity to hemolysins
YDR496C	6.81965	0.49404	0.00233208	0.0187382	0.351265	YDR496C	2171	PUF6	Pumilio-homology domain protein that binds the 3' UTR of ASH1 mRNA and represses its translation, resulting in proper asymmetric localization of ASH1 mRNA also co-sediments with the 60S ribosomal subunit and is required for its biogenesis
YGR128C	7.27758	0.545748	0.00236579	0.0189376	0.192678	YGR128C	2342	UTP8	Nucleolar protein required for export of tRNAs from the nucleus also copurifies with the small subunit (SSU) processome containing the U3 snoRNA that is involved in processing of pre-18S rRNA
YJL031C	5.64621	-0.417107	0.00236718	0.0189376	0.840207	YJL031C	1271	BET4	Alpha subunit of Type II geranylgeranyltransferase required for vesicular transport between the endoplasmic reticulum and the Golgi provides a membrane attachment moiety to Rab-like proteins Ypt1p and Sec4p
YOL013W-A	5.78142	-0.529933	0.00237157	0.0189376	0.346853	YOL013W-A	392	YOL013W-A	Putative protein of unknown function identified by SAGE
YDR034C-D/YDR034C-C	5.13656	0.48641	0.00237188	0.0189376	0.682325	YDR034C-D/YDR034C-C	5514	YDR034C-D/YDR034C-C	Retrotransposon TYA Gag and TYB Pol genes transcribed/translated as one unit polyprotein is processed to make a nucleocapsid-like protein (Gag), reverse transcriptase (RT), protease (PR), and integrase (IN) similar to retroviral genes/Retrotransposon TYA Gag gene co-transcribed with TYB Pol translated as TYA or TYA-TYB polyprotein Gag is a nucleocapsid protein that is the structural constituent o…
YIR038C	6.61831	-0.487125	0.00237646	0.0189376	0.374001	YIR038C	905	GTT1	ER associated glutathione S-transferase capable of homodimerization expression induced during the diauxic shift and throughout stationary phase functional overlap with Gtt2p, Grx1p, and Grx2p
YFL010W-A	3.39086	-1.33045	0.0023775	0.0189376	0.0194779	YFL010W-A	485	AUA1	Protein required for the negative regulation by ammonia of Gap1p, which is a general amino acid permease
YDR036C	4.96731	0.605451	0.00238642	0.0189812	0.316075	YDR036C	1703	EHD3	3-hydroxyisobutyryl-CoA hydrolase, member of a family of enoyl-CoA hydratase/isomerases non-tagged protein is detected in highly purified mitochondria in high-throughput studies phosphorylated mutation affects fluid-phase endocytosis
YJL083W	0.792565	1.3481	0.00239859	0.0190317	0.659489	YJL083W	2015	TAX4	EH domain-containing protein involved in regulating phosphatidylinositol 4,5-bisphosphate levels and autophagy Irs4p and Tax4p bind and activate the PtdIns phosphatase Inp51p Irs4p and Tax4p are involved in localizing Atg17p to the PAS
YDR240C	4.54982	-0.588207	0.00239968	0.0190317	0.500238	YDR240C	1679	SNU56	Component of U1 snRNP required for mRNA splicing via spliceosome yeast specific, no metazoan counterpart interacts with mRNA in commitment complex
YDL230W	4.28603	0.600067	0.00240336	0.0190335	0.588224	YDL230W	1208	PTP1	Phosphotyrosine-specific protein phosphatase that dephosphorylates a broad range of substrates in vivo, including Fpr3p localized to the cytoplasm and the mitochondria proposed to be a negative regulator of filamentation
YKR045C	4.54595	-0.681164	0.00241217	0.019035	0.248446	YKR045C	752	YKR045C	Putative protein of unknown function epitope-tagged protein localizes to the cytoplasm
YFL011W	2.3799	0.973303	0.00241423	0.019035	0.660616	YFL011W	1841	HXT10	Putative hexose transporter, expressed at low levels and expression is repressed by glucose
YGR095C	5.2264	-0.546133	0.0024151	0.019035	0.404962	YGR095C	872	RRP46	Exosome non-catalytic core component involved in 3'-5' RNA processing and degradation in both the nucleus and the cytoplasm has similarity to E. coli RNase PH and to human hRrp46p (EXOSC5)
YOL081W	7.06265	0.329461	0.00241736	0.019035	0.993442	YOL081W	9440	IRA2	GTPase-activating protein that negatively regulates RAS by converting it from the GTP- to the GDP-bound inactive form, required for reducing cAMP levels under nutrient limiting conditions, has similarity to Ira1p and human neurofibromin
YBL079W	8.79484	0.401097	0.00243524	0.0191484	0.70547	YBL079W	4709	NUP170	Subunit of the nuclear pore complex (NPC), required for NPC localization of specific nucleoporins involved in nuclear envelope permeability and chromosome segregation has similar to Nup157p essential role, with Nup157p, in NPC assembly
YDR427W	7.66059	0.35263	0.00244282	0.0191807	0.936106	YDR427W	1382	RPN9	Non-ATPase regulatory subunit of the 26S proteasome, has similarity to putative proteasomal subunits in other species null mutant is temperature sensitive and exhibits cell cycle and proteasome assembly defects
YDR232W	7.03262	0.532094	0.0024513	0.0191911	0.222938	YDR232W	1847	HEM1	5-aminolevulinate synthase, catalyzes the first step in the heme biosynthetic pathway an N-terminal signal sequence is required for localization to the mitochondrial matrix expression is regulated by Hap2p-Hap3p
YMR020W	5.52179	-0.723499	0.0024518	0.0191911	0.0676514	YMR020W	1727	FMS1	Polyamine oxidase, converts spermine to spermidine, which is required for the essential hypusination modification of translation factor eIF-5A also involved in pantothenic acid biosynthesis
YMR236W	8.98944	-0.420925	0.00245459	0.0191911	0.599562	YMR236W	674	TAF9	Subunit (17 kDa) of TFIID and SAGA complexes, involved in RNA polymerase II transcription initiation and in chromatin modification, similar to histone H3
YKR013W	7.58714	-1.06819	0.00247151	0.019296	0.00224504	YKR013W	1190	PRY2	Protein of unknown function
YGR120C	4.88665	-0.49293	0.00248279	0.0193498	0.720133	YGR120C	989	COG2	Essential component of the conserved oligomeric Golgi complex (Cog1p through Cog8p), a cytosolic tethering complex that functions in protein trafficking to mediate fusion of transport vesicles to Golgi compartments
YML111W	5.67869	-0.522077	0.00248542	0.0193498	0.381774	YML111W	2963	BUL2	Component of the Rsp5p E3-ubiquitin ligase complex, involved in intracellular amino acid permease sorting, functions in heat shock element mediated gene expression, essential for growth in stress conditions, functional homolog of BUL1
YBR234C	7.90798	0.364694	0.00249146	0.0193567	0.88149	YBR234C	1355	ARC40	Subunit of the ARP2/3 complex, which is required for the motility and integrity of cortical actin patches
YLR018C	7.18814	-0.426881	0.00249334	0.0193567	0.583503	YLR018C	1100	POM34	Integral membrane protein of the nuclear pore has an important role in maintaining the architecture of the pore complex
YPL134C	6.16953	0.384083	0.00255638	0.0198182	0.887227	YPL134C	1133	ODC1	Mitochondrial inner membrane transporter, exports 2-oxoadipate and 2-oxoglutarate from the mitochondrial matrix to the cytosol for lysine and glutamate biosynthesis and lysine catabolism suppresses, in multicopy, an fmc1 null mutation
YPL144W	6.13769	-0.47411	0.00258404	0.0200045	0.463518	YPL144W	647	POC4	Component of a heterodimeric Poc4p-Irc25p chaperone involved in assembly of alpha subunits into the 20S proteasome may regulate formation of proteasome isoforms with alternative subunits under different conditions
YFR012W-A	1.99378	1.32893	0.00258855	0.0200113	0.271334	YFR012W-A	287	YFR012W-A	Putative protein of unknown function identified by homology
YLR096W	5.37831	0.384603	0.00259436	0.0200281	0.975547	YLR096W	3644	KIN2	Serine/threonine protein kinase involved in regulation of exocytosis localizes to the cytoplasmic face of the plasma membrane closely related to Kin1p
YER137W-A	3.41658	-0.788297	0.00262569	0.0202212	0.440409	YER137W-A	506	YER137W-A	Dubious open reading frame unlikely to encode a functional protein, based on available experimental and comparative sequence data
YML085C	8.45502	0.53419	0.00262911	0.0202212	0.190364	YML085C	1660	TUB1	Alpha-tubulin associates with beta-tubulin (Tub2p) to form tubulin dimer, which polymerizes to form microtubules
YDL130W-A	6.17502	-0.583386	0.00263037	0.0202212	0.161942	YDL130W-A	461	STF1	Protein involved in regulation of the mitochondrial F1F0-ATP synthase Stf1p and Stf2p may act as stabilizing factors that enhance inhibitory action of the Inh1p protein
YJL137C	4.25158	0.540778	0.00264092	0.0202461	0.782958	YJL137C	1343	GLG2	Self-glucosylating initiator of glycogen synthesis, also glucosylates n-dodecyl-beta-D-maltoside similar to mammalian glycogenin
YBR023C	6.50725	-0.549481	0.00264095	0.0202461	0.193903	YBR023C	3698	CHS3	Chitin synthase III, catalyzes the transfer of N-acetylglucosamine (GlcNAc) to chitin required for synthesis of the majority of cell wall chitin, the chitin ring during bud emergence, and spore wall chitosan
YDL181W	7.62031	-0.420828	0.00264504	0.0202493	0.584138	YDL181W	458	INH1	Protein that inhibits ATP hydrolysis by the F1F0-ATP synthase inhibitory function is enhanced by stabilizing proteins Stf1p and Stf2p has similarity to Stf1p has a calmodulin-binding motif and binds calmodulin in vitro
YPL001W	4.75911	-0.460451	0.00265808	0.0203209	0.879335	YPL001W	1325	HAT1	Catalytic subunit of the Hat1p-Hat2p histone acetyltransferase complex that uses the cofactor acetyl coenzyme A, to acetylate free nuclear and cytoplasmic histone H4 involved in telomeric silencing and DNA double-strand break repair
YGR145W	6.57268	0.440243	0.00267063	0.0203885	0.55247	YGR145W	2324	ENP2	Essential nucleolar protein, required for biogenesis of the small ribosomal subunit contains WD repeats, interacts with Mpp10p and Bfr2p, and has homology to Spb1p
YBR290W	5.98981	-0.434116	0.00268182	0.0204456	0.656181	YBR290W	1166	BSD2	Heavy metal ion homeostasis protein, facilitates trafficking of Smf1p and Smf2p metal transporters to the vacuole where they are degraded, controls metal ion transport, prevents metal hyperaccumulation, functions in copper detoxification
YMR169C	4.32263	-0.770755	0.00271776	0.020691	0.180724	YMR169C	1721	ALD3	Cytoplasmic aldehyde dehydrogenase, involved in beta-alanine synthesis uses NAD+ as the preferred coenzyme very similar to Ald2p expression is induced by stress and repressed by glucose
YHR023W	5.17236	0.636657	0.00273426	0.0207743	0.199632	YHR023W	5987	MYO1	Type II myosin heavy chain, required for wild-type cytokinesis and cell separation localizes to the actomyosin ring binds to myosin light chains Mlc1p and Mlc2p through its IQ1 and IQ2 motifs respectively
YGL080W	9.05168	-0.47018	0.00273624	0.0207743	0.357977	YGL080W	593	FMP37	Putative protein of unknown function highly conserved across species and orthologous to human gene BRP44L the authentic, non-tagged protein is detected in highly purified mitochondria in high-throughput studies
YLR310C	5.4762	0.496094	0.00274247	0.020793	0.506669	YLR310C	4970	CDC25	Membrane bound guanine nucleotide exchange factor (GEF or GDP-release factor) indirectly regulates adenylate cyclase through activation of Ras1p and Ras2p by stimulating the exchange of GDP for GTP required for progression through G1
YJL054W	5.96804	-0.543046	0.00277737	0.0210287	0.244452	YJL054W	1637	TIM54	Component of the mitochondrial TIM22 complex involved in insertion of polytopic proteins into the inner membrane
YDL195W	8.17511	0.376195	0.00280125	0.0211707	0.795044	YDL195W	4022	SEC31	Component of the Sec13p-Sec31p complex of the COPII vesicle coat, required for vesicle formation in ER to Golgi transport mutant has increased aneuploidy tolerance
YJL044C	5.39904	0.438356	0.00280381	0.0211707	0.771407	YJL044C	1577	GYP6	GTPase-activating protein (GAP) for the yeast Rab family member, Ypt6p involved in vesicle mediated protein transport
YFR032C-A	11.3354	-0.553641	0.00286985	0.0216397	0.208146	YFR032C-A	380	RPL29	Protein component of the large (60S) ribosomal subunit, has similarity to rat L29 ribosomal protein not essential for translation, but required for proper joining of the large and small ribosomal subunits and for normal translation rate
YMR145C	7.33041	-0.355172	0.00290338	0.0218373	0.902825	YMR145C	1883	NDE1	Mitochondrial external NADH dehydrogenase, a type II NAD(P)H:quinone oxidoreductase that catalyzes the oxidation of cytosolic NADH Nde1p and Nde2p provide cytosolic NADH to the mitochondrial respiratory chain
YDR465C	6.17283	0.551894	0.00290398	0.0218373	0.205672	YDR465C	1439	RMT2	Arginine N5 methyltransferase methylates ribosomal protein Rpl12 (L12) on Arg67
YDL178W	6.64097	-0.45893	0.00296189	0.022239	0.428937	YDL178W	1793	DLD2	D-lactate dehydrogenase, located in the mitochondrial matrix
YDR115W	7.23419	-0.514755	0.00296697	0.022239	0.220391	YDR115W	518	YDR115W	Putative mitochondrial ribosomal protein of the large subunit, has similarity to E. coli L34 ribosomal protein required for respiratory growth, as are most mitochondrial ribosomal proteins
YLR019W	4.4574	0.484502	0.00296985	0.022239	0.883277	YLR019W	1394	PSR2	Functionally redundant Psr1p homolog, a plasma membrane phosphatase involved in the general stress response required with Psr1p and Whi2p for full activation of STRE-mediated gene expression, possibly through dephosphorylation of Msn2p
YJL024C	6.22529	-0.329858	0.00297354	0.022239	0.994984	YJL024C	862	APS3	Small subunit of the clathrin-associated adaptor complex AP-3, which is involved in vacuolar protein sorting related to the sigma subunit of the mammalian clathrin AP-3 complex suppressor of loss of casein kinase 1 function
YLR240W	4.29529	0.471495	0.00298068	0.0222622	0.961821	YLR240W	2828	VPS34	Phosphatidylinositol 3-kinase responsible for the synthesis of phosphatidylinositol 3-phosphate forms membrane-associated signal transduction complex with Vps15p to regulate protein sorting activated by the GTP-bound form of Gpa1p
YKL191W	5.84282	0.511391	0.00299609	0.022347	0.350001	YKL191W	1805	DPH2	Protein required, along with Dph1p, Kti11p, Jjj3p, and Dph5p, for synthesis of diphthamide, which is a modified histidine residue of translation elongation factor 2 (Eft1p or Eft2p) may act in a complex with Dph1p and Kti11p
YML036W	6.37491	-0.473622	0.00300049	0.0223496	0.396081	YML036W	852	CGI121	Component of the EKC/KEOPS complex with Bud32p, Kae1p, Pcc1p, and Gon7p EKC/KEOPS complex is required for t6A tRNA modification and may have roles in telomere maintenance and transcription Cgi121p is dispensable for tRNA modification
YKR104W	1.2296	1.16811	0.00301381	0.0224185	0.76425	YKR104W	1121	YKR104W	Putative transporter of the multidrug resistance-associated protein (MRP) subfamily contains a stop codon in S288C adjacent ORFs YKR103W and YKR104W are merged in different strain backgrounds
YBR276C	5.73167	0.377574	0.0030247	0.0224692	0.93053	YBR276C	2624	PPS1	Protein phosphatase with specificity for serine, threonine, and tyrosine residues has a role in the DNA synthesis phase of the cell cycle
YIL053W	9.66251	0.433549	0.00304999	0.0226266	0.51285	YIL053W	953	RHR2	Constitutively expressed isoform of DL-glycerol-3-phosphatase involved in glycerol biosynthesis, induced in response to both anaerobic and, along with the Hor2p/Gpp2p isoform, osmotic stress
YDR060W	7.94833	0.51885	0.00307815	0.0228048	0.198206	YDR060W	3278	MAK21	Constituent of 66S pre-ribosomal particles, required for large (60S) ribosomal subunit biogenesis involved in nuclear export of pre-ribosomes required for maintenance of dsRNA virus homolog of human CAATT-binding protein
YDL191W	11.6423	-0.463154	0.00308437	0.0228202	0.490624	YDL191W	1054	RPL35A	Protein component of the large (60S) ribosomal subunit, identical to Rpl35Bp and has similarity to rat L35 ribosomal protein
YER115C	6.6159	-0.384338	0.00310681	0.0229554	0.785155	YER115C	776	SPR6	Protein of unknown function, expressed during sporulation not required for sporulation, but gene exhibits genetic interactions with other genes required for sporulation
YHR199C	7.29164	-0.486489	0.00311546	0.0229885	0.287906	YHR199C	1133	AIM46	Putative protein of unknown function the authentic, non-tagged protein is detected in highly purified mitochondria in high-throughput studies null mutant displays elevated frequency of mitochondrial genome loss
YBL017C	6.34405	-0.555592	0.00312416	0.0230219	0.170402	YBL017C	4940	PEP1	Type I transmembrane sorting receptor for multiple vacuolar hydrolases cycles between the late-Golgi and prevacuolar endosome-like compartments
YIR018C-A	4.44325	-0.501293	0.00313586	0.0230457	0.803653	YIR018C-A	338	YIR018C-A	Putative protein of unknown function identified by expression profiling and mass spectrometry
YFR043C	3.61034	-0.66215	0.00314123	0.0230457	0.671731	YFR043C	914	IRC6	Putative protein of unknown function null mutant displays increased levels of spontaneous Rad52p foci
YJR135C	3.83779	-0.629485	0.00314717	0.0230457	0.637391	YJR135C	920	MCM22	Protein involved in minichromosome maintenance component of the kinetochore binds to centromeric DNA in a Ctf19p-dependent manner
YDR515W	4.47079	0.481991	0.00315161	0.0230457	0.868899	YDR515W	1544	SLF1	RNA binding protein that associates with polysomes proposed to be involved in regulating mRNA translation involved in the copper-dependent mineralization of copper sulfide complexes on cell surface in cells cultured in copper salts
YGL001C	6.38467	-0.399528	0.00315238	0.0230457	0.723029	YGL001C	1250	ERG26	C-3 sterol dehydrogenase, catalyzes the second of three steps required to remove two C-4 methyl groups from an intermediate in ergosterol biosynthesis
YBR195C	5.00482	-0.484387	0.00315247	0.0230457	0.638427	YBR195C	1469	MSI1	Subunit of chromatin assembly factor I (CAF-1), negative regulator of the RAS/cAMP pathway via sequestration of Npr1p kinase localizes to the nucleus and cytoplasm homologous to human retinoblastoma binding proteins RbAp48 and RbAp46
YLR388W	10.2381	-0.529495	0.00317441	0.0231753	0.206542	YLR388W	371	RPS29A	Protein component of the small (40S) ribosomal subunit nearly identical to Rps29Bp and has similarity to rat S29 and E. coli S14 ribosomal proteins
YDR346C	6.37626	0.501173	0.00317898	0.023178	0.294662	YDR346C	1646	SVF1	Protein with a potential role in cell survival pathways, required for the diauxic growth shift expression in mammalian cells increases survival under conditions inducing apoptosis mutant has increased aneuploidy tolerance
YIL125W	5.59578	0.583054	0.0031857	0.0231963	0.190596	YIL125W	3245	KGD1	Component of the mitochondrial alpha-ketoglutarate dehydrogenase complex, which catalyzes a key step in the tricarboxylic acid (TCA) cycle, the oxidative decarboxylation of alpha-ketoglutarate to form succinyl-CoA
YNL195C	2.92761	0.947477	0.00320056	0.0232737	0.331549	YNL195C	986	YNL195C	Putative protein of unknown function shares a promoter with YNL194C the authentic, non-tagged protein is detected in highly purified mitochondria in high-throughput studies
YGR132C	5.8856	0.591069	0.00322337	0.0234087	0.152652	YGR132C	1064	PHB1	Subunit of the prohibitin complex (Phb1p-Phb2p), a 1.2 MDa ring-shaped inner mitochondrial membrane chaperone that stabilizes newly synthesized proteins determinant of replicative life span involved in mitochondrial segregation
YFR004W	6.22399	-0.397143	0.0032427	0.0235181	0.751761	YFR004W	1121	RPN11	Metalloprotease subunit of the 19S regulatory particle of the 26S proteasome lid couples the deubiquitination and degradation of proteasome substrates involved, independent of catalytic activity, in fission of mitochondria and peroxisomes
YBR258C	3.2098	-0.869715	0.0032729	0.0236853	0.346708	YBR258C	629	SHG1	Subunit of the COMPASS (Set1C) complex, which methylates histone H3 on lysine 4 and is required in transcriptional silencing near telomeres
YJR146W/YJR147W	4.60544	-0.709514	0.00327435	0.0236853	0.146549	YJR146W/YJR147W	1588	YJR146W/HMS2	Dubious open reading frame unlikely to encode a protein, based on available experimental and comparative sequence data partially overlaps the verified gene HMS2/Protein with similarity to heat shock transcription factors overexpression suppresses the pseudohyphal filamentation defect of a diploid mep1 mep2 homozygous null mutant
YER077C	3.64611	-0.646793	0.00328916	0.0237613	0.685929	YER077C	2267	YER077C	Putative protein of unknown function green fluorescent protein (GFP)-fusion protein localizes to the mitochondrion null mutation results in a decrease in plasma membrane electron transport
YMR181C	3.43524	0.621025	0.00330258	0.023827	0.868122	YMR181C	665	YMR181C	Protein of unknown function mRNA transcribed as part of a bicistronic transcript with a predicted transcriptional repressor RGM1/YMR182C mRNA is destroyed by nonsense-mediated decay (NMD) YMR181C is not an essential gene
YML122C	0.828452	1.18178	0.00332623	0.0239481	0.875353	YML122C	581	YML122C	Dubious open reading frame unlikely to encode a protein, based on available experimental and comparative sequence data
YKL210W	6.02584	0.437794	0.00332806	0.0239481	0.586586	YKL210W	3275	UBA1	Ubiquitin activating enzyme (E1), involved in ubiquitin-mediated protein degradation and essential for viability
YPL244C	5.06761	-0.418941	0.00334604	0.0240461	0.891141	YPL244C	1220	HUT1	Protein with a role in UDP-galactose transport to the Golgi lumen, has similarity to human UDP-galactose transporter UGTrel1, exhibits a genetic interaction with S. cerevisiae ERO1
YPL119C-A	2.29202	0.950942	0.00337494	0.0241975	0.649271	YPL119C-A	464	YPL119C-A	Putative protein of unknown function identified by expression profiling and mass spectrometry
YKL120W	6.41068	0.447538	0.00337588	0.0241975	0.470381	YKL120W	1175	OAC1	Mitochondrial inner membrane transporter, transports oxaloacetate, sulfate, thiosulfate, and isopropylmalate member of the mitochondrial carrier family
YOL041C	7.28538	0.367109	0.00338884	0.0242443	0.812078	YOL041C	1580	NOP12	Nucleolar protein involved in pre-25S rRNA processing and biogenesis of large 60S ribosomal subunit contains an RNA recognition motif (RRM) binds to Ebp2 similar to Nop13p and Nsr1p
YNL215W	6.39098	-0.521155	0.00339278	0.0242443	0.222089	YNL215W	1163	IES2	Protein that associates with the INO80 chromatin remodeling complex under low-salt conditions essential for growth under anaerobic conditions
YPL175W	5.19831	-0.479257	0.00339562	0.0242443	0.576936	YPL175W	1659	SPT14	UDP-GlcNAc-binding and catalytic subunit of the enzyme that mediates the first step in glycosylphosphatidylinositol (GPI) biosynthesis, mutations cause defects in transcription and in biogenesis of cell wall proteins
YDR487C	6.5257	-0.371028	0.00340297	0.0242654	0.832956	YDR487C	827	RIB3	3,4-dihydroxy-2-butanone-4-phosphate synthase (DHBP synthase), required for riboflavin biosynthesis from ribulose-5-phosphate, also has an unrelated function in mitochondrial respiration
YOR342C	7.193	-0.613296	0.00343405	0.0244554	0.0739997	YOR342C	1160	YOR342C	Putative protein of unknown function green fluorescent protein (GFP)-fusion protein localizes to the cytoplasm and the nucleus
YDL201W	5.92875	-0.428099	0.00343993	0.0244657	0.632724	YDL201W	1061	TRM8	Subunit of a tRNA methyltransferase complex composed of Trm8p and Trm82p that catalyzes 7-methylguanosine modification of tRNA
YOR335C	6.51109	0.475623	0.00344659	0.0244815	0.351102	YOR335C	3077	ALA1	Cytoplasmic and mitochondrial alanyl-tRNA synthetase, required for protein synthesis point mutation (cdc64-1 allele) causes cell cycle arrest at G1 lethality of null mutation is functionally complemented by human homolog
YPL189W	2.29492	0.854522	0.00347434	0.0246468	0.796886	YPL189W	2030	GUP2	Probable membrane protein with a possible role in proton symport of glycerol member of the MBOAT family of putative membrane-bound O-acyltransferases Gup1p homolog
YJL167W	9.09031	-0.378274	0.00348453	0.0246873	0.732933	YJL167W	1259	ERG20	Farnesyl pyrophosphate synthetase, has both dimethylallyltranstransferase and geranyltranstransferase activities catalyzes the formation of C15 farnesyl pyrophosphate units for isoprenoid and sterol biosynthesis
YDR375C	7.41536	0.356758	0.003491	0.0247014	0.853025	YDR375C	1571	BCS1	Mitochondrial protein of the AAA ATPase family has ATP-dependent chaperone activity required for assembly of Rip1p and Qcr10p into cytochrome bc(1) complex mutations in human homolog BCS1L are linked to neonatal mitochondrial diseases
YFL014W	7.47463	-0.856469	0.00349942	0.0247292	0.00976496	YFL014W	530	HSP12	Plasma membrane protein involved in maintaining membrane organization in stress conditions induced by heat shock, oxidative stress, osmostress, stationary phase, glucose depletion, oleate and alcohol regulated by HOG and Ras-Pka pathways
YER110C	8.91335	0.370443	0.00351979	0.0248413	0.775384	YER110C	3542	KAP123	Karyopherin beta, mediates nuclear import of ribosomal proteins prior to assembly into ribosomes and import of histones H3 and H4 localizes to the nuclear pore, nucleus, and cytoplasm exhibits genetic interactions with RAI1
YOL070C	7.03753	0.655047	0.00352603	0.0248535	0.056719	YOL070C	1706	NBA1	Protein of unknown function, localizes to the bud neck and cytoplasm interacts with Nap1p may interact with ribosomes, based on co-purification experiments potential Cdc28p substrate
YDL031W	7.30248	0.437173	0.00356651	0.0251068	0.435955	YDL031W	3188	DBP10	Putative ATP-dependent RNA helicase of the DEAD-box protein family, constituent of 66S pre-ribosomal particles essential protein involved in ribosome biogenesis
YNR016C	6.76408	0.372556	0.00357542	0.0251374	0.808919	YNR016C	6902	ACC1	Acetyl-CoA carboxylase, biotin containing enzyme that catalyzes the carboxylation of acetyl-CoA to form malonyl-CoA required for de novo biosynthesis of long-chain fatty acids
YGR077C	5.882	-0.413649	0.00359115	0.0252158	0.697302	YGR077C	1970	PEX8	Intraperoxisomal organizer of the peroxisomal import machinery, tightly associated with the lumenal face of the peroxisomal membrane, essential for peroxisome biogenesis, binds PTS1-signal receptor Pex5p
YOR032C	2.98694	0.835273	0.00361486	0.02535	0.4865	YOR032C	1505	HMS1	Basic helix-loop-helix (bHLH) protein with similarity to myc-family transcription factors overexpression confers hyperfilamentous growth and suppresses the pseudohyphal filamentation defect of a diploid mep1 mep2 homozygous null mutant
YGR253C	7.16682	-0.412489	0.00362446	0.0253576	0.555901	YGR253C	983	PUP2	Alpha 5 subunit of the 20S proteasome involved in ubiquitin-dependent catabolism human homolog is subunit zeta
YPL041C	4.12426	0.575889	0.00362622	0.0253576	0.648705	YPL041C	824	YPL041C	Protein of unknown function involved in maintenance of proper telomere length
YJL079C	7.99328	-0.564906	0.00362974	0.0253576	0.109022	YJL079C	1100	PRY1	Protein of unknown function
YMR076C	5.80459	0.666771	0.00365834	0.025525	0.0756643	YMR076C	4034	PDS5	Protein required for establishment and maintenance of sister chromatid condensation and cohesion, colocalizes with cohesin on chromosomes, may function as a protein-protein interaction scaffold also required during meiosis
YGR024C	4.22281	0.524791	0.00367521	0.0255791	0.777875	YGR024C	914	THG1	tRNAHis guanylyltransferase, adds a guanosine residue to the 5' end of tRNAHis after transcription and RNase P cleavage couples nuclear division and migration to cell budding and cytokinesis essential enzyme conserved among eukaryotes
YKL041W	4.17185	-0.634808	0.00368391	0.0255791	0.41088	YKL041W	875	VPS24	One of four subunits of the endosomal sorting complex required for transport III (ESCRT-III) forms an ESCRT-III subcomplex with Did4p involved in the sorting of transmembrane proteins into the multivesicular body (MVB) pathway
YNL133C	4.64245	-0.408412	0.00368459	0.0255791	0.984225	YNL133C	722	FYV6	Protein of unknown function, required for survival upon exposure to K1 killer toxin proposed to regulate double-strand break repair via non-homologous end-joining
YGR146C	6.07374	-0.752246	0.0036891	0.0255791	0.0267227	YGR146C	836	ECL1	Protein of unknown function, affects chronological lifespan induced by iron homeostasis transcription factor Aft2p multicopy suppressor of temperature sensitive hsf1 mutant induced by treatment with 8-methoxypsoralen and UVA irradiation
YGR157W	7.57213	0.307486	0.0036893	0.0255791	0.993847	YGR157W	2810	CHO2	Phosphatidylethanolamine methyltransferase (PEMT), catalyzes the first step in the conversion of phosphatidylethanolamine to phosphatidylcholine during the methylation pathway of phosphatidylcholine biosynthesis
YPL183W-A	3.77931	-0.579366	0.00369599	0.0255934	0.801224	YPL183W-A	482	RTC6	Protein involved translation mutants have defects in biogenesis of nuclear ribosomes sequence similar to prokaryotic ribosomal protein L36, may be a mitochondrial ribosomal protein encoded in the nucleus
YDR357C	6.84912	-0.451021	0.00371002	0.0256583	0.38787	YDR357C	569	CNL1	Protein of unknown function likely member of BLOC complex involved in endosomal cargo sorting null mutant is sensitive to drug inducing secretion of vacuolar cargo green fluorescent protein (GFP)-fusion protein localizes to the cytoplasm
YLR450W	6.99174	0.415997	0.00371833	0.0256692	0.541015	YLR450W	3338	HMG2	One of two isozymes of HMG-CoA reductase that convert HMG-CoA to mevalonate, a rate-limiting step in sterol biosynthesis overproduction induces assembly of peripheral ER membrane arrays and short nuclear-associated membrane stacks
YPL141C	5.48646	0.732723	0.00372092	0.0256692	0.0567729	YPL141C	2798	FRK1	Putative protein kinase similar to Kin4p green fluorescent protein (GFP)-fusion protein localizes to the cytoplasm interacts with rRNA transcription and ribosome biogenesis factors and the long chain fatty acyl-CoA synthetase Faa3
YLR348C	7.33806	0.607032	0.00376517	0.025942	0.0714004	YLR348C	1097	DIC1	Mitochondrial dicarboxylate carrier, integral membrane protein, catalyzes a dicarboxylate-phosphate exchange across the inner mitochondrial membrane, transports cytoplasmic dicarboxylates into the mitochondrial matrix
YBR127C	9.41324	0.414148	0.00377147	0.025953	0.533464	YBR127C	1754	VMA2	Subunit B of the eight-subunit V1 peripheral membrane domain of the vacuolar H+-ATPase (V-ATPase), an electrogenic proton pump found throughout the endomembrane system contains nucleotide binding sites also detected in the cytoplasm
YKL043W	5.30935	-0.690199	0.00379482	0.0260811	0.077183	YKL043W	1301	PHD1	Transcriptional activator that enhances pseudohyphal growth physically interacts with the Tup1-Cyc8 complex and recruits Tup1p to its targets regulates expression of FLO11, an adhesin required for pseudohyphal filament formation similar to StuA, an A. nidulans developmental regulator potential Cdc28p substrate
YJL049W	5.15234	-0.533676	0.00380195	0.0260976	0.356465	YJL049W	1553	YJL049W	Putative protein of unknown function YJL049W is a non-essential gene
YDL014W	8.90104	0.46051	0.00384236	0.0263422	0.316657	YDL014W	1184	NOP1	Nucleolar protein, component of the small subunit processome complex, which is required for processing of pre-18S rRNA has similarity to mammalian fibrillarin
YGR146C-A	3.40339	-0.712934	0.00386793	0.0264845	0.528852	YGR146C-A	362	YGR146C-A	Putative protein of unknown function
YEL026W	9.48522	-0.42775	0.00388246	0.0265352	0.46134	YEL026W	581	SNU13	RNA binding protein, part of U3 snoRNP involved in rRNA processing, part of U4/U6-U5 tri-snRNP involved in mRNA splicing, similar to human 15.5K protein
YHR057C	6.99548	-0.715007	0.00388496	0.0265352	0.0256318	YHR057C	818	CPR2	Peptidyl-prolyl cis-trans isomerase (cyclophilin), catalyzes the cis-trans isomerization of peptide bonds N-terminal to proline residues has a potential role in the secretory pathway
YGL231C	6.5427	-0.400807	0.00390437	0.0266347	0.636561	YGL231C	773	EMC4	Member of a transmembrane complex required for efficient folding of proteins in the ER null mutant displays induction of the unfolded protein response human ortholog TMEM85 may function in apoptosis
YDL155W	4.90699	-0.483907	0.00391589	0.0266803	0.618782	YDL155W	1484	CLB3	B-type cyclin involved in cell cycle progression activates Cdc28p to promote the G2/M transition may be involved in DNA replication and spindle assembly accumulates during S phase and G2, then targeted for ubiquitin-mediated degradation
YHR045W	3.95224	-0.573444	0.00394242	0.0268279	0.694013	YHR045W	1883	YHR045W	Putative protein of unknown function possible role in iron metabolism and/or amino acid and carbohydrate metabolism green fluorescent protein (GFP)-fusion protein localizes to the endoplasmic reticulum
YKL014C	5.49668	0.486953	0.00396024	0.026916	0.430049	YKL014C	5495	URB1	Nucleolar protein required for the normal accumulation of 25S and 5.8S rRNAs, associated with the 27SA2 pre-ribosomal particle proposed to be involved in the biogenesis of the 60S ribosomal subunit
YBR056W	5.4673	-0.55879	0.00396837	0.026938	0.216894	YBR056W	1706	YBR056W	Putative cytoplasmic protein of unknown function
YNL127W	6.0078	-0.36846	0.00397486	0.0269489	0.875672	YNL127W	3062	FAR11	Protein involved in recovery from cell cycle arrest in response to pheromone, in a Far1p-independent pathway interacts with Far3p, Far7p, Far8p, Far9p, and Far10p has similarity to the N- and C-termini of N. crassa HAM-2
YJR009C	11.6769	0.465884	0.00399631	0.027061	0.412454	YJR009C	1199	TDH2	Glyceraldehyde-3-phosphate dehydrogenase, isozyme 2, involved in glycolysis and gluconeogenesis tetramer that catalyzes the reaction of glyceraldehyde-3-phosphate to 1,3 bis-phosphoglycerate detected in the cytoplasm and cell wall
YIL108W	6.5843	-0.523875	0.00403775	0.0273081	0.180204	YIL108W	2291	YIL108W	Putative metalloprotease
YGR105W	7.18162	-0.384624	0.00404523	0.0273239	0.667158	YGR105W	434	VMA21	Integral membrane protein that is required for vacuolar H+-ATPase (V-ATPase) function, although not an actual component of the V-ATPase complex functions in the assembly of the V-ATPase localized to the yeast endoplasmic reticulum (ER)
YLR050C	4.82606	-0.526145	0.00405	0.0273239	0.465368	YLR050C	686	YLR050C	Putative protein of unknown function green fluorescent protein (GFP)-fusion protein localizes to the endoplasmic reticulum YLR050C is not an essential gene
YHR163W	6.5505	0.312624	0.0040569	0.027337	0.993763	YHR163W	950	SOL3	6-phosphogluconolactonase, catalyzes the second step of the pentose phosphate pathway weak multicopy suppressor of los1-1 mutation homologous to Sol2p and Sol1p
YDR120C	6.94235	0.463706	0.00406638	0.0273674	0.321975	YDR120C	1913	TRM1	tRNA methyltransferase two forms of the protein are made by alternative translation starts localizes to both the nucleus and mitochondrion to produce the modified base N2,N2-dimethylguanosine in tRNAs in both compartments
YER058W	4.00403	0.621842	0.00410956	0.0275995	0.506069	YER058W	524	PET117	Protein required for assembly of cytochrome c oxidase
YJR088C	10.0256	0.522688	0.00411206	0.0275995	0.176981	YJR088C	1079	EMC2	Member of a transmembrane complex required for efficient folding of proteins in the ER null mutant displays induction of the unfolded protein response
YAL030W	6.39957	0.348366	0.00411589	0.0275995	0.907961	YAL030W	667	SNC1	Vesicle membrane receptor protein (v-SNARE) involved in the fusion between Golgi-derived secretory vesicles with the plasma membrane proposed to be involved in endocytosis member of the synaptobrevin/VAMP family of R-type v-SNARE proteins
YNR008W	5.27372	0.449771	0.00413375	0.0276856	0.64254	YNR008W	2186	LRO1	Acyltransferase that catalyzes diacylglycerol esterification one of several acyltransferases that contribute to triglyceride synthesis putative homolog of human lecithin cholesterol acyltransferase
YNL018C	0.455301	1.63516	0.00414762	0.0277447	0.315882	YNL018C	2039	YNL018C	Putative protein of unknown function
YEL052W	6.77346	-0.332842	0.00415568	0.027765	0.942538	YEL052W	1730	AFG1	Conserved protein that may act as a chaperone in the degradation of misfolded or unassembled cytochrome c oxidase subunits localized to matrix face of the mitochondrial inner membrane member of the AAA family but lacks a protease domain
YGL224C	6.62238	-0.464422	0.00417294	0.0278465	0.327024	YGL224C	1043	SDT1	Pyrimidine nucleotidase overexpression suppresses the 6-AU sensitivity of transcription elongation factor S-II, as well as resistance to other pyrimidine derivatives
YNL140C/YNL139C	4.86604	-0.431988	0.00419252	0.0279334	0.845657	YNL140C/YNL139C	5001	YNL140C/THO2	Dubious open reading frame unlikely to encode a protein, based on available experimental and comparative sequence data partially overlaps the verified gene THO2/YNL139C/Subunit of the THO complex, which is required for efficient transcription elongation and involved in transcriptional elongation-associated recombination required for LacZ RNA expression from certain plasmids
YOR355W	7.72625	-0.333107	0.0041961	0.0279334	0.914051	YOR355W	1769	GDS1	Protein of unknown function, required for growth on glycerol as a carbon source the authentic, non-tagged protein is detected in highly purified mitochondria in high-throughput studies
YDR170W-A	7.14145	-0.770434	0.00420484	0.0279572	0.0140629	YDR170W-A	1523	YDR170W-A	Retrotransposon TYA Gag gene Gag is a nucleocapsid protein that is the structural constituent of virus-like particles (VLPs) similar to retroviral Gag YDR170W-A is part of a mutant retrotransposon
YOR142W	6.59482	0.420696	0.00420981	0.0279572	0.513076	YOR142W	1190	LSC1	Alpha subunit of succinyl-CoA ligase, which is a mitochondrial enzyme of the TCA cycle that catalyzes the nucleotide-dependent conversion of succinyl-CoA to succinate phosphorylated
YNL259C	7.05579	-0.410795	0.00426519	0.0282909	0.520292	YNL259C	422	ATX1	Cytosolic copper metallochaperone that transports copper to the secretory vesicle copper transporter Ccc2p for eventual insertion into Fet3p, which is a multicopper oxidase required for high-affinity iron uptake
YLR383W	4.55063	0.529921	0.00428828	0.0284099	0.551514	YLR383W	3545	SMC6	Protein involved in structural maintenance of chromosomes essential subunit of Mms21-Smc5-Smc6 complex required for growth, DNA repair, interchromosomal and sister chromatid recombination homologous to S. pombe rad18
YLR201C/YLR202C	5.30836	0.548592	0.00431578	0.0285577	0.264528	YLR201C/YLR202C	1326	COQ9/YLR202C	Protein required for ubiquinone (coenzyme Q) biosynthesis and respiratory growth localizes to the matrix face of the mitochondrial inner membrane in a large complex with ubiquinone biosynthetic enzymes/Dubious open reading frame unlikely to encode a protein, based on available experimental and comparative sequence data partially overlaps the verified ORF YLR201C ORF contains a putative intron
YOR347C	3.81916	-0.813403	0.00433862	0.0286745	0.159104	YOR347C	1721	PYK2	Pyruvate kinase that appears to be modulated by phosphorylation PYK2 transcription is repressed by glucose, and Pyk2p may be active under low glycolytic flux
YDL046W	8.88543	0.414585	0.00440266	0.0290628	0.466527	YDL046W	722	NPC2	Functional homolog of human NPC2/He1, which is a cholesterol-binding protein whose deficiency causes Niemann-Pick type C2 disease involving retention of cholesterol in lysosomes
YDL039C	4.08459	-0.592399	0.00442652	0.0291854	0.50417	YDL039C	2297	PRM7	Pheromone-regulated protein, predicted to have one transmembrane segment promoter contains Gcn4p binding elements
YJL097W	5.60952	-0.38269	0.00443252	0.02919	0.851236	YJL097W	854	PHS1	Essential 3-hydroxyacyl-CoA dehydratase of the ER membrane, involved in elongation of very long-chain fatty acids evolutionarily conserved, similar to mammalian PTPLA and PTPLB involved in sphingolipid biosynthesis and protein trafficking
YPR041W	7.75249	0.428668	0.00445034	0.0292471	0.403239	YPR041W	1418	TIF5	Translation initiation factor eIF5 functions both as a GTPase-activating protein to mediate hydrolysis of ribosome-bound GTP and as a GDP dissociation inhibitor to prevent recycling of eIF2
YKL114C	5.55901	-0.557213	0.00445495	0.0292471	0.188534	YKL114C	1304	APN1	Major apurinic/apyrimidinic endonuclease, 3'-repair diesterase involved in repair of DNA damage by oxidation and alkylating agents also functions as a 3'-5' exonuclease to repair 7,8-dihydro-8-oxodeoxyguanosine
YPL249C	5.62527	0.431729	0.0044571	0.0292471	0.608031	YPL249C	2885	GYP5	GTPase-activating protein (GAP) for yeast Rab family members involved in ER to Golgi trafficking exhibits GAP activity toward Ypt1p that is stimulated by Gyl1p, also acts on Sec4p interacts with Gyl1p, Rvs161p and Rvs167p involved in recruiting Rvs167p to the bud tip during polarized growth
YBL001C	8.61956	-0.331929	0.00448989	0.0294272	0.899126	YBL001C	515	ECM15	Non-essential protein of unknown function, likely exists as tetramer, may be regulated by the binding of small-molecule ligands (possibly sulfate ions), may have a role in yeast cell-wall biogenesis
YJR126C	6.14692	0.535207	0.00451316	0.0295446	0.174198	YJR126C	2636	VPS70	Protein of unknown function involved in vacuolar protein sorting
YOL077C	7.92809	0.381221	0.00453091	0.0296256	0.632053	YOL077C	1076	BRX1	Nucleolar protein, constituent of 66S pre-ribosomal particles depletion leads to defects in rRNA processing and a block in the assembly of large ribosomal subunits possesses a sigma(70)-like RNA-binding motif
YLR017W	5.96369	0.367147	0.00453685	0.0296293	0.860742	YLR017W	1214	MEU1	Methylthioadenosine phosphorylase (MTAP), catalyzes the initial step in the methionine salvage pathway affects polyamine biosynthesis through regulation of ornithine decarboxylase (Spe1p) activity regulates ADH2 gene expression
YPL107W	4.0188	-0.51592	0.00455764	0.0297298	0.836168	YPL107W	947	YPL107W	Putative protein of unknown function green fluorescent protein (GFP)-fusion protein localizes to mitochondria YPL107W is not an essential gene
YPL105C	6.36007	0.403945	0.0045728	0.0297935	0.603689	YPL105C	2750	SYH1	Protein of unknown function that influences nuclear pore distribution co-purifies with ribosomes contains a GYF domain, which bind proline-rich sequences deletion extends chronological lifespan
YFR002W	5.6666	0.4556	0.0045856	0.0298204	0.488317	YFR002W	2720	NIC96	Component of the nuclear pore complex, required for nuclear pore formation forms a subcomplex with Nsp1p, Nup57p, and Nup49p
YBR233W	5.5108	0.409368	0.00458776	0.0298204	0.755519	YBR233W	1442	PBP2	RNA binding protein with similarity to mammalian heterogeneous nuclear RNP K protein, involved in the regulation of telomere position effect and telomere length
YMR216C	6.33155	-0.362682	0.0046045	0.029894	0.816916	YMR216C	2429	SKY1	SR protein kinase (SRPK) involved in regulating proteins involved in mRNA metabolism and cation homeostasis similar to human SRPK1
YNL170W	3.85426	0.509209	0.00462818	0.0300124	0.913176	YNL170W	596	YNL170W	Dubious open reading frame unlikely to encode a functional protein, based on available experimental and comparative sequence data
YCR075W-A	5.25217	-0.377442	0.00466355	0.0302062	0.929814	YCR075W-A	428	YCR075W-A	Putative protein of unknown function identified by homology to Ashbya gossypii
YAR042W	7.68918	0.484234	0.00471383	0.0304665	0.20985	YAR042W	3767	SWH1	Protein similar to mammalian oxysterol-binding protein contains ankyrin repeats localizes to the Golgi and the nucleus-vacuole junction
YGL019W	7.53732	-0.361905	0.00471479	0.0304665	0.738602	YGL019W	1037	CKB1	Beta regulatory subunit of casein kinase 2 (CK2), a Ser/Thr protein kinase with roles in cell growth and proliferation CK2, comprised of CKA1, CKA2, CKB1 and CKB2, has many substrates including transcription factors and all RNA polymerases
YIL056W	6.43174	-0.391246	0.00474747	0.0305931	0.644346	YIL056W	2123	VHR1	Transcriptional activator, required for the vitamin H-responsive element (VHRE) mediated induction of VHT1 (Vitamin H transporter) and BIO5 (biotin biosynthesis intermediate transporter) in response to low biotin concentrations
YBR224W/YBR225W	3.76662	-0.705648	0.00474769	0.0305931	0.33233	YBR224W/YBR225W	3405	YBR224W/YBR225W	Dubious open reading frame unlikely to encode a protein, based on available experimental and comparative sequence data partially overlaps the verified gene TDP1/Putative protein of unknown function non-essential gene identified in a screen for mutants affected in mannosylphophorylation of cell wall components
YJR086W/YJR087W	5.8769	-0.630442	0.00475149	0.0305931	0.0720143	YJR086W/YJR087W	883	STE18/YJR087W	G protein gamma subunit, forms a dimer with Ste4p to activate the mating signaling pathway, forms a heterotrimer with Gpa1p and Ste4p to dampen signaling C-terminus is palmitoylated and farnesylated, which are required for normal signaling/Dubious open reading frame, unlikely to encode a protein not conserved in closely related Saccharomyces species partially overlaps the verified genes STE18 and…
YGL117W	3.89823	0.748437	0.00475658	0.0305931	0.232646	YGL117W	998	YGL117W	Putative protein of unknown function
YBR247C	5.40835	0.449426	0.00480581	0.0308737	0.562364	YBR247C	1652	ENP1	Protein associated with U3 and U14 snoRNAs, required for pre-rRNA processing and 40S ribosomal subunit synthesis localized in the nucleus and concentrated in the nucleolus
YNL040W	4.55569	-0.466445	0.00481424	0.0308918	0.772432	YNL040W	1571	YNL040W	Putative protein of unknown function with strong similarity to alanyl-tRNA synthases from Eubacteria green fluorescent protein (GFP)-fusion protein localizes to the cytoplasm YNL040W is not an essential gene
YDR507C	6.72092	0.585402	0.00482168	0.0309036	0.0861224	YDR507C	3629	GIN4	Protein kinase involved in bud growth and assembly of the septin ring, proposed to have kinase-dependent and kinase-independent activities undergoes autophosphorylation similar to Kcc4p and Hsl1p
YNL146C-A	3.62153	-0.611635	0.00484468	0.0310149	0.615654	YNL146C-A	395	YNL146C-A	Putative protein of unknown function
YJR061W	4.31461	0.57118	0.00491348	0.0314189	0.477572	YJR061W	3008	YJR061W	Putative protein of unknown function non-essential gene with similarity to Mnn4, a putative membrane protein involved in glycosylation transcription repressed by Rm101p
YBR253W	7.02053	-0.425089	0.00492675	0.0314672	0.414664	YBR253W	566	SRB6	Subunit of the RNA polymerase II mediator complex associates with core polymerase subunits to form the RNA polymerase II holoenzyme essential for transcriptional regulation
YBL058W	6.90831	0.349005	0.00493486	0.0314826	0.828854	YBL058W	1472	SHP1	UBX (ubiquitin regulatory X) domain-containing protein that regulates Glc7p phosphatase activity and interacts with Cdc48p interacts with ubiquitylated proteins in vivo and is required for degradation of a ubiquitylated model substrate
YPR013C	3.75253	-0.608807	0.00495088	0.0315483	0.62828	YPR013C	1154	YPR013C	Putative zinc finger protein YPR013C is not an essential gene
YOR171C	4.72684	0.422748	0.00496795	0.0316205	0.891342	YOR171C	2075	LCB4	Sphingoid long-chain base kinase, responsible for synthesis of long-chain base phosphates, which function as signaling molecules, regulates synthesis of ceramide from exogenous long-chain bases, localizes to the Golgi and late endosomes
YLR016C	4.22612	-0.57639	0.0049894	0.0317204	0.480582	YLR016C	815	PML1	Subunit of the RES complex, which is required for nuclear retention of unspliced pre-mRNAs acts in the same pathway as Pml39p and Mlp1p
YNR021W	8.37571	0.333436	0.00503728	0.0319879	0.866212	YNR021W	1415	YNR021W	Putative protein of unknown function green fluorescent protein (GFP)-fusion protein localizes to the endoplasmic reticulum YNR021W is not an essential gene
YLR405W	5.30055	-0.420364	0.00504887	0.0320246	0.716801	YLR405W	1304	DUS4	Dihydrouridine synthase, member of a widespread family of conserved proteins including Smm1p, Dus1p, and Dus3p
YIL013C	4.15194	0.645329	0.00509645	0.0322892	0.300463	YIL013C	4436	PDR11	ATP-binding cassette (ABC) transporter, multidrug transporter involved in multiple drug resistance mediates sterol uptake when sterol biosynthesis is compromisedregulated by Pdr1p required for anaerobic growth
YNL202W	2.36208	0.868568	0.00511883	0.0323768	0.653649	YNL202W	1079	SPS19	Peroxisomal 2,4-dienoyl-CoA reductase, auxiliary enzyme of fatty acid beta-oxidation homodimeric enzyme required for growth and sporulation on petroselineate medium expression induced during late sporulation and in the presence of oleate
YDR146C	4.87487	0.557926	0.00512202	0.0323768	0.303214	YDR146C	2330	SWI5	Transcription factor that activates transcription of genes expressed at the M/G1 phase boundary and in G1 phase localization to the nucleus occurs during G1 and appears to be regulated by phosphorylation by Cdc28p kinase
YHR006W	6.03408	-0.461376	0.00519071	0.0327734	0.347553	YHR006W	1826	STP2	Transcription factor, activated by proteolytic processing in response to signals from the SPS sensor system for external amino acids activates transcription of amino acid permease genes
YLR453C	3.32513	-0.612674	0.00520985	0.0328566	0.830859	YLR453C	1388	RIF2	Protein that binds to the Rap1p C-terminus and acts synergistically with Rif1p to help control telomere length and establish telomeric silencing deletion results in telomere elongation
YOL043C	3.37233	-0.560417	0.00522829	0.0329352	0.95158	YOL043C	1343	NTG2	DNA N-glycosylase and apurinic/apyrimidinic (AP) lyase involved in base excision repair, localizes to the nucleus sumoylated
YPR190C	4.92322	0.492855	0.00524715	0.033013	0.499789	YPR190C	2165	RPC82	RNA polymerase III subunit C82
YER087C-A	3.86026	-0.564226	0.00525261	0.033013	0.715422	YER087C-A	752	YER087C-A	Dubious open reading frame unlikely to encode a protein, based on experimental and comparative sequence data overlaps the uncharacterized gene YER087W, a putative tRNA synthetase
YBL089W	4.43989	-0.494101	0.00528082	0.0331525	0.684384	YBL089W	1580	AVT5	Putative transporter, member of a family of seven S. cerevisiae genes (AVT1-7) related to vesicular GABA-glycine transporters
YMR011W	6.78747	-0.857456	0.00529462	0.0332013	0.00649258	YMR011W	1826	HXT2	High-affinity glucose transporter of the major facilitator superfamily, expression is induced by low levels of glucose and repressed by high levels of glucose
YGR162W	5.41548	0.644605	0.00530446	0.0332252	0.0808647	YGR162W	3059	TIF4631	Translation initiation factor eIF4G, subunit of the mRNA cap-binding protein complex (eIF4F) that also contains eIF4E (Cdc33p) interacts with Pab1p and with eIF4A (Tif1p) also has a role in biogenesis of the large ribosomal subunit
YHR047C	7.01048	0.348313	0.00534101	0.0333787	0.802746	YHR047C	2771	AAP1	Arginine/alanine aminopeptidase, overproduction stimulates glycogen accumulation
YAR007C	4.2156	0.625462	0.00534107	0.0333787	0.313783	YAR007C	2066	RFA1	Subunit of heterotrimeric Replication Protein A (RPA), which is a highly conserved single-stranded DNA binding protein involved in DNA replication, repair, and recombination
YLR390W	6.01238	-0.475368	0.00538604	0.0336216	0.291252	YLR390W	539	ECM19	Putative protein of unknown function the authentic, non-tagged protein is detected in highly purified mitochondria in high-throughput studies
YFL027C	4.31953	-0.424846	0.00543086	0.0338344	0.964729	YFL027C	1694	GYP8	GTPase-activating protein for yeast Rab family members Ypt1p is the preferred in vitro substrate but also acts on Sec4p, Ypt31p and Ypt32p involved in the regulation of ER to Golgi vesicle transport
YGL067W	6.18889	-0.425159	0.00543241	0.0338344	0.45711	YGL067W	1355	NPY1	NADH diphosphatase (pyrophosphatase), hydrolyzes the pyrophosphate linkage in NADH and related nucleotides localizes to peroxisomes
YDR148C	5.9506	0.381715	0.00546255	0.0339837	0.730009	YDR148C	1592	KGD2	Dihydrolipoyl transsuccinylase, component of the mitochondrial alpha-ketoglutarate dehydrogenase complex, which catalyzes the oxidative decarboxylation of alpha-ketoglutarate to succinyl-CoA in the TCA cycle phosphorylated
YML128C	3.98911	-0.778455	0.00547855	0.0340399	0.131907	YML128C	1742	MSC1	Protein of unknown function mutant is defective in directing meiotic recombination events to homologous chromatids the authentic, non-tagged protein is detected in highly purified mitochondria and is phosphorylated
YKR010C	4.7593	0.43044	0.00548394	0.0340399	0.832524	YKR010C	2516	TOF2	Protein required for rDNA silencing and mitotic rDNA condensation stimulates Cdc14p phosphatase activity and biphasic release to promote rDNA repeat segregation required for condensin recruitment to the replication fork barrier site
YFL062W	4.78356	-0.486639	0.0055396	0.0343212	0.55231	YFL062W	1340	COS4	Protein of unknown function, member of the DUP380 subfamily of conserved, often subtelomerically-encoded proteins
YJR077C	7.79617	0.302487	0.00554467	0.0343212	0.97241	YJR077C	1136	MIR1	Mitochondrial phosphate carrier, imports inorganic phosphate into mitochondria functionally redundant with Pic2p but more abundant than Pic2p under normal conditions phosphorylated
YJL016W	6.08025	-0.470825	0.00554792	0.0343212	0.292171	YJL016W	1886	YJL016W	Putative protein of unknown function GFP-fusion protein localizes to the cytoplasm conserved in closely related Saccharomyces species
YOL119C	6.58381	0.379435	0.00559852	0.0345953	0.648309	YOL119C	1706	MCH4	Protein with similarity to mammalian monocarboxylate permeases, which are involved in transport of monocarboxylic acids across the plasma membrane mutant is not deficient in monocarboxylate transport
YDL188C	6.85973	0.29693	0.00561131	0.0346356	0.991687	YDL188C	1334	PPH22	Catalytic subunit of protein phosphatase 2A (PP2A), functionally redundant with Pph21p methylated at C terminus forms alternate complexes with several regulatory subunits involved in signal transduction and regulation of mitosis
YDR381W	6.54972	-0.371719	0.00564794	0.0348226	0.690454	YDR381W	1647	YRA1	RNA binding protein required for export of poly(A)+ mRNA from the nucleus proposed to couple mRNA export with 3' end processing via its interactions with Mex67p and Pcf11p functionally redundant with Yra2p, another REF family member
YIL103W	4.93222	0.430055	0.00568951	0.0350398	0.755266	YIL103W	1478	DPH1	Protein required, along with Dph2p, Kti11p, Jjj3p, and Dph5p, for synthesis of diphthamide, which is a modified histidine residue of translation elongation factor 2 (Eft1p or Eft2p) may act in a complex with Dph2p and Kti11p
YMR156C	3.41168	-0.636137	0.00574228	0.0353253	0.650497	YMR156C	917	TPP1	DNA 3'-phosphatase that functions in repair of endogenous damage of double-stranded DNA, activity is specific for removal of 3' phosphates at strand breaks has similarity to the l-2-haloacid dehalogenase superfamily
YOR125C	4.4693	0.452157	0.00576128	0.0354027	0.832324	YOR125C	902	CAT5	Protein required for ubiquinone (Coenzyme Q) biosynthesis localizes to the matrix face of the mitochondrial inner membrane in a large complex with ubiquinone biosynthetic enzymes required for gluconeogenic gene activation
YMR243C	6.20866	0.442408	0.00578699	0.035521	0.382775	YMR243C	1529	ZRC1	Vacuolar membrane zinc transporter, transports zinc from the cytosol into the vacuole for storage also has a role in resistance to zinc shock resulting from a sudden influx of zinc into the cytoplasm
YJR015W	6.56634	-0.347038	0.00585653	0.0359079	0.814392	YJR015W	1733	YJR015W	Putative protein of unknown function localizes to the endoplasmic reticulum and cytoplasm predicted to encode a membrane transporter based on phylogenetic analysis YJR015W is a non-essential gene
YDR133C	9.93359	0.580959	0.00588212	0.0360247	0.0701697	YDR133C	536	YDR133C	Dubious open reading frame unlikely to encode a protein, based on available experimental and comparative sequence data partially overlaps YDR134C
YPL208W	3.61263	0.55176	0.00590226	0.0361027	0.853819	YPL208W	1952	RKM1	SET-domain lysine-N-methyltransferase, catalyzes the formation of dimethyllysine residues on the large ribsomal subunit protein L23a (RPL23A and RPL23B)
YMR264W	6.45371	-0.286476	0.00590796	0.0361027	0.999376	YMR264W	812	CUE1	Endoplasmic reticulum membrane protein that recruits the ubiquitin-conjugating enzyme Ubc7p to the ER where it functions in protein degradation contains a CUE domain that binds ubiquitin to facilitate intramolecular monoubiquitination
YDR391C	4.58739	-0.473166	0.00595494	0.0363495	0.673774	YDR391C	899	YDR391C	Putative protein of unknown function, possibly involved in zinc homeostasis Bdf1p-dependent transcription induced by salt stress green fluorescent protein (GFP)-fusion protein localizes to both the cytoplasm and the nucleus
YOL155W-A	1.96887	-0.91795	0.00597844	0.0364284	0.610294	YOL155W-A	335	YOL155W-A	Putative protein of unknown function identified by expression profiling and mass spectrometry
YNL193W	5.17768	0.419026	0.00599295	0.0364284	0.703395	YNL193W	1877	YNL193W	Putative protein of unknown function exhibits a two-hybrid interaction with Yhr151cp in a large-scale analysis
YMR170C	4.44738	-0.493262	0.00599371	0.0364284	0.647775	YMR170C	1721	ALD2	Cytoplasmic aldehyde dehydrogenase, involved in ethanol oxidation and beta-alanine biosynthesis uses NAD+ as the preferred coenzyme expression is stress induced and glucose repressed very similar to Ald3p
YDR320C-A	7.75888	-0.41853	0.0059943	0.0364284	0.364893	YDR320C-A	419	DAD4	Essential subunit of the Dam1 complex (aka DASH complex), couples kinetochores to the force produced by MT depolymerization thereby aiding in chromosome segregation is transferred to the kinetochore prior to mitosis
YGL094C	5.30651	0.559289	0.00603	0.0365653	0.180957	YGL094C	3548	PAN2	Essential subunit of the Pan2p-Pan3p poly(A)-ribonuclease complex, which acts to control poly(A) tail length and regulate the stoichiometry and activity of postreplication repair complexes
YPL246C	6.90347	0.333695	0.00603009	0.0365653	0.859297	YPL246C	989	RBD2	Possible rhomboid protease, has similarity to eukaryotic rhomboid proteases including Pcp1p
YFL034C-A	7.7028	-0.411393	0.00605563	0.0366798	0.39426	YFL034C-A	890	RPL22B	Protein component of the large (60S) ribosomal subunit, has similarity to Rpl22Ap and to rat L22 ribosomal protein
YER013W	5.74773	-0.482152	0.00607512	0.0367575	0.286832	YER013W	3638	PRP22	DEAH-box RNA-dependent ATPase/ATP-dependent RNA helicase, associates with lariat intermediates before the second catalytic step of splicing mediates ATP-dependent mRNA release from the spliceosome and unwinds RNA duplexes
YJL217W	7.57091	0.582972	0.00610848	0.0369177	0.0596134	YJL217W	797	REE1	Cytoplasmic protein involved in the regulation of enolase (ENO1) mRNA expression is induced by calcium shortage, copper deficiency (via Mac1p) and the presence of galactose (via Gal4p) mRNA expression is also regulated by the cell cycle
YJL193W	4.54873	-0.492503	0.006115	0.0369177	0.60043	YJL193W	1409	YJL193W	Putative protein of unknown function, predicted to encode a triose phosphate transporter subfamily member based on phylogenetic analysis similar to YOR307C/SLY41 deletion mutant has a respiratory growth defect
YMR069W	4.53577	0.747193	0.00617188	0.0371805	0.0730663	YMR069W	1058	NAT4	N alpha-acetyl-transferase, involved in acetylation of the N-terminal residues of histones H4 and H2A
YIL147C	5.18927	0.390431	0.00617874	0.0371805	0.838766	YIL147C	3863	SLN1	Histidine kinase osmosensor that regulates a MAP kinase cascade transmembrane protein with an intracellular kinase domain that signals to Ypd1p and Ssk1p, thereby forming a phosphorelay system similar to bacterial two-component regulators
YEL016C	4.20073	-0.543356	0.00617877	0.0371805	0.522727	YEL016C	1682	NPP2	Nucleotide pyrophosphatase/phosphodiesterase family member mediates extracellular nucleotide phosphate hydrolysis along with Npp1p and Pho5p activity and expression enhanced during conditions of phosphate starvation
YJR156C	1.94743	0.974154	0.00621043	0.0373303	0.585038	YJR156C	1223	THI11	Protein involved in synthesis of the thiamine precursor hydroxymethylpyrimidine (HMP) member of a subtelomeric gene family including THI5, THI11, THI12, and THI13
YBR293W	3.86379	-0.559708	0.00625106	0.0375336	0.672083	YBR293W	1625	VBA2	Permease of basic amino acids in the vacuolar membrane
YKL091C	3.7192	-0.485979	0.00625962	0.0375441	0.940817	YKL091C	1133	YKL091C	Putative homolog of Sec14p, which is a phosphatidylinositol/phosphatidylcholine transfer protein involved in lipid metabolism localizes to the nucleus contains a CRAL/TRIO domain and binds several lipids in a large-scale study
YBR063C	5.32718	0.374329	0.00629447	0.0377121	0.869455	YBR063C	1415	YBR063C	Putative protein of unknown function YBR063C is not an essential gene
YCR017C	6.62996	0.364067	0.00630862	0.0377507	0.691905	YCR017C	3062	CWH43	Putative sensor/transporter protein involved in cell wall biogenesis contains 14-16 transmembrane segments and several putative glycosylation and phosphorylation sites null mutation is synthetically lethal with pkc1 deletion
YBR038W	5.84799	0.509533	0.00632011	0.0377507	0.261007	YBR038W	3092	CHS2	Chitin synthase II catalyzes transfer of N-acetylglucosamine (GlcNAc) to chitin upon activation of zymogenic form required for chitin synthesis in the primary septum during cytokinesis localization regulated by Cdk1p during mitosis
YBR054W	4.41488	0.802596	0.00632147	0.0377507	0.0570112	YBR054W	1235	YRO2	Protein of unknown function with similarity to archaeal rhodopsins the authentic, non-tagged protein is detected in a phosphorylated state in highly purified mitochondria in high-throughput studies transcriptionally regulated by Haa1p
YGL156W	4.82046	-0.838581	0.00639534	0.0381139	0.0237256	YGL156W	3452	AMS1	Vacuolar alpha mannosidase, involved in free oligosaccharide (fOS) degradation delivered to the vacuole in a novel pathway separate from the secretory pathway
YJR117W	7.38873	0.394611	0.00639611	0.0381139	0.468653	YJR117W	1562	STE24	Highly conserved zinc metalloprotease that functions in two steps of a-factor maturation, C-terminal CAAX proteolysis and the first step of N-terminal proteolytic processing contains multiple transmembrane spans
YFL009W	5.36347	-0.467996	0.00641468	0.0381833	0.40012	YFL009W	2540	CDC4	F-box protein required for G1/S and G2/M transition, associates with Skp1p and Cdc53p to form a complex, SCFCdc4, which acts as ubiquitin-protein ligase directing ubiquitination of the phosphorylated CDK inhibitor Sic1p
YDR035W	6.61481	0.353529	0.0064862	0.0385673	0.7443	YDR035W	1313	ARO3	3-deoxy-D-arabino-heptulosonate-7-phosphate (DAHP) synthase, catalyzes the first step in aromatic amino acid biosynthesis and is feedback-inhibited by phenylalanine or high concentration of tyrosine or tryptophan
YFL044C	3.09261	-0.641399	0.00652815	0.0387613	0.80376	YFL044C	1106	OTU1	Deubiquitylation enzyme that binds to the chaperone-ATPase Cdc48p may contribute to regulation of protein degradation by deubiquitylating substrates that have been ubiquitylated by Ufd2p member of the Ovarian Tumor (OTU) family
YLL023C	6.29268	0.401223	0.00653729	0.0387613	0.516217	YLL023C	1040	POM33	Transmembrane nucleoporin involved in nuclear pore complex (NPC) distribution, assembly or stabilization highly conserved across species, orthologous to human TMEM33 and paralogous to Per33p
YDR291W	3.84905	0.460988	0.00653992	0.0387613	0.972594	YDR291W	3434	HRQ1	Putative RecQ helicase belongs to the widely conserved RecQ family of proteins which are involved in maintaining genomic integrity similar to the human RecQ4p implicated in Rothmund-Thomson syndrome(RTS)
YNL136W	5.35634	-0.353416	0.00658317	0.0389758	0.929914	YNL136W	1478	EAF7	Subunit of the NuA4 histone acetyltransferase complex, which acetylates the N-terminal tails of histones H4 and H2A
YOR195W	4.72477	0.449954	0.00663167	0.0392208	0.692766	YOR195W	2666	SLK19	Kinetochore-associated protein required for normal segregation of chromosomes in meiosis and mitosis component of the FEAR regulatory network, which promotes Cdc14p release from the nucleolus during anaphase potential Cdc28p substrate
YJL077W-A	6.8705	-0.426242	0.00669609	0.0394962	0.343861	YJL077W-A	287	YJL077W-A	Dubious open reading frame unlikely to encode a protein, based on available experimental and comparative sequence data completely overlaps the verified gene YJL077C/ICS3
YDR007W	5.8862	-0.360754	0.00669804	0.0394962	0.792365	YDR007W	875	TRP1	Phosphoribosylanthranilate isomerase that catalyzes the third step in tryptophan biosynthesis in 2004, the sequence of TRP1 from strain S228C was updated by changing the previously annotated internal STOP (TAA) to serine (TCA)
YOR133W	8.84352	0.300169	0.00670498	0.0394962	0.954537	YOR133W	2729	EFT1	Elongation factor 2 (EF-2), also encoded by EFT2 catalyzes ribosomal translocation during protein synthesis contains diphthamide, the unique posttranslationally modified histidine residue specifically ADP-ribosylated by diphtheria toxin
YLR154C-G	7.60727	0.593505	0.0067069	0.0394962	0.0474666	YLR154C-G	350	YLR154C-G	Putative protein of unknown function identified by fungal homology comparisons and RT-PCR this ORF is contained within RDN25-2 and RDN37-2
YDR142C	4.84166	-0.44266	0.00671571	0.0395059	0.663935	YDR142C	1328	PEX7	Peroxisomal signal receptor for the N-terminal nonapeptide signal (PTS2) of peroxisomal matrix proteins WD repeat protein defects in human homolog cause lethal rhizomelic chondrodysplasia punctata (RCDP)
YPR148C	6.41518	0.442862	0.00672498	0.0395182	0.314432	YPR148C	1508	YPR148C	Protein of unknown function that may interact with ribosomes, based on co-purification experiments green fluorescent protein (GFP)-fusion protein localizes to the cytoplasm in a punctate pattern
YPR158W	3.47555	0.834062	0.00673581	0.0395397	0.171062	YPR158W	959	CUR1	Protein of unknown function involved in destabilization of [URE3] prions similar in sequence to Btn2p
YGL110C	6.92412	-0.397754	0.00675862	0.0396314	0.457481	YGL110C	2075	CUE3	Protein of unknown function has a CUE domain that binds ubiquitin, which may facilitate intramolecular monoubiquitination
YGR140W	4.39719	0.487185	0.00679841	0.039809	0.644097	YGR140W	3071	CBF2	Essential kinetochore protein, component of the CBF3 multisubunit complex that binds to the CDEIII region of the centromere Cbf2p also binds to the CDEII region possibly forming a different multimeric complex, ubiquitinated in vivo
YNL011C	4.69422	-0.494596	0.00680336	0.039809	0.48597	YNL011C	1535	YNL011C	Putative protein of unknown function YNL011C is not an essential gene
YCR038C/YCR039C	4.57433	-0.421918	0.0068179	0.0398518	0.862965	YCR038C/YCR039C	2758	BUD5/MATALPHA2	GTP/GDP exchange factor for Rsr1p (Bud1p) required for both axial and bipolar budding patterns mutants exhibit random budding in all cell types/Homeobox-domain protein that, with Mcm1p, represses a-specific genes in haploids acts with A1p to repress transcription of haploid-specific genes in diploids one of two genes encoded by the MATalpha mating type cassette
YNL213C	5.71224	-0.35738	0.00683399	0.0399035	0.836744	YNL213C	845	RRG9	Protein of unknown function null mutant lacks mitochondrial DNA and cannot grow on glycerol the authentic, non-tagged protein is detected in highly purified mitochondria in high-throughput studies
YBL091C-A	4.90627	-0.477146	0.00685058	0.0399581	0.475599	YBL091C-A	816	SCS22	Protein involved in regulation of phospholipid metabolism homolog of Scs2p similar to D. melanogaster inturned protein
YBR196C-B	1.76012	0.903397	0.00686059	0.0399742	0.819198	YBR196C-B	305	YBR196C-B	Putative protein of unknown function identified by expression profiling and mass spectrometry
YBR084W	7.5675	0.473938	0.00689813	0.0400857	0.177467	YBR084W	3128	MIS1	Mitochondrial C1-tetrahydrofolate synthase, involved in interconversion between different oxidation states of tetrahydrofolate (THF) provides activities of formyl-THF synthetase, methenyl-THF cyclohydrolase, and methylene-THF dehydrogenase
YPR056W	4.37851	-0.417621	0.00689866	0.0400857	0.938839	YPR056W	1217	TFB4	Subunit of TFIIH complex, involved in transcription initiation, similar to 34 kDa subunit of human TFIIH interacts with Ssl1p
YHR114W	4.99236	0.617111	0.00690154	0.0400857	0.125987	YHR114W	2102	BZZ1	SH3 domain protein implicated in the regulation of actin polymerization, able to recruit actin polymerization machinery through its SH3 domains, colocalizes with cortical actin patches and Las17p, interacts with type I myosins
YJR094W-A	11.0502	-0.375338	0.00691303	0.04009	0.652338	YJR094W-A	754	RPL43B	Protein component of the large (60S) ribosomal subunit, identical to Rpl43Ap and has similarity to rat L37a ribosomal protein
YOR117W	7.65944	0.294922	0.00691684	0.04009	0.96715	YOR117W	1505	RPT5	One of six ATPases of the 19S regulatory particle of the 26S proteasome involved in the degradation of ubiquitinated substrates recruited to the GAL1-10 promoter region upon induction of transcription similar to human TBP1
YKL138C	5.24936	-0.39803	0.00698197	0.040425	0.738704	YKL138C	596	MRPL31	Mitochondrial ribosomal protein of the large subunit
YDR541C	4.70027	-0.413054	0.00699293	0.0404326	0.848811	YDR541C	1235	YDR541C	Putative dihydrokaempferol 4-reductase
YER031C	7.62574	0.354186	0.00700271	0.0404326	0.658441	YER031C	872	YPT31	Rab family GTPase, very similar to Ypt32p involved in the exocytic pathway mediates intra-Golgi traffic or the budding of post-Golgi vesicles from the trans-Golgi
YPL240C	9.78959	0.558106	0.00700528	0.0404326	0.0726759	YPL240C	2330	HSP82	Hsp90 chaperone required for pheromone signaling and negative regulation of Hsf1p docks with Tom70p for mitochondrial preprotein delivery promotes telomerase DNA binding and nucleotide addition interacts with Cns1p, Cpr6p, Cpr7p, Sti1p
YIL034C	7.32691	-0.323666	0.00701707	0.0404582	0.848248	YIL034C	1064	CAP2	Beta subunit of the capping protein (CP) heterodimer (Cap1p and Cap2p) which binds to the barbed ends of actin filaments preventing further polymerization localized predominantly to cortical actin patches
YMR056C	6.74966	-0.394375	0.00704181	0.0405225	0.465179	YMR056C	1130	AAC1	Mitochondrial inner membrane ADP/ATP translocator, exchanges cytosolic ADP for mitochondrially synthesized ATP phosphorylated Aac1p is a minor isoform while Pet9p is the major ADP/ATP translocator
YOL109W	10.2035	-0.424081	0.00704291	0.0405225	0.353164	YOL109W	542	ZEO1	Peripheral membrane protein of the plasma membrane that interacts with Mid2p regulates the cell integrity pathway mediated by Pkc1p and Slt2p the authentic protein is detected in a phosphorylated state in highly purified mitochondria
YDR101C	4.94983	0.438473	0.00705875	0.0405713	0.639455	YDR101C	1982	ARX1	Shuttling pre-60S factor involved in the biogenesis of ribosomal large subunit biogenesis interacts directly with Alb1 responsible for Tif6 recycling defects in absence of Rei1 associated with the ribosomal export complex
YHR021W-A	2.09856	-0.955521	0.00711167	0.0408328	0.532905	YHR021W-A	656	ECM12	Putative protein of unknown function may contribute to cell wall biosynthesis, mutants display zymolyase hypersensitivity
YDL045W-A	5.50708	-0.435996	0.0071292	0.0408538	0.467295	YDL045W-A	488	MRP10	Mitochondrial ribosomal protein of the small subunit contains twin cysteine-x9-cysteine motifs
YGL112C	6.90472	0.325972	0.00713014	0.0408538	0.856915	YGL112C	1751	TAF6	Subunit (60 kDa) of TFIID and SAGA complexes, involved in transcription initiation of RNA polymerase II and in chromatin modification, similar to histone H4
YOL064C	4.92184	0.467533	0.00719193	0.041165	0.506167	YOL064C	1274	MET22	Bisphosphate-3'-nucleotidase, involved in salt tolerance and methionine biogenesis dephosphorylates 3'-phosphoadenosine-5'-phosphate and 3'-phosphoadenosine-5'-phosphosulfate, intermediates of the sulfate assimilation pathway
YMR180C	3.51185	-0.640396	0.00721186	0.0412363	0.505761	YMR180C	1163	CTL1	RNA 5'-triphosphatase, localizes to both the nucleus and cytoplasm
YPR169W	7.33109	-0.33333	0.0072205	0.0412429	0.781769	YPR169W	1679	JIP5	Essential protein required for biogenesis of the large ribosomal subunit interacts with proteins involved in RNA processing, ribosome biogenesis, ubiquitination and demethylation similar to WDR55, a human WD repeat protein
YNL214W	2.02751	0.832822	0.00726745	0.0414681	0.825943	YNL214W	800	PEX17	Peroxisomal membrane peroxin and subunit of the docking complex that facilitates the import of peroxisomal matrix proteins required for peroxisome biogenesis
YCR072C	6.32749	0.335459	0.0072925	0.041568	0.847212	YCR072C	1748	RSA4	WD-repeat protein involved in ribosome biogenesis may interact with ribosomes required for maturation and efficient intra-nuclear transport or pre-60S ribosomal subunits, localizes to the nucleolus
YHR013C	6.43097	-0.324238	0.00730759	0.041611	0.884776	YHR013C	917	ARD1	Subunit of N-terminal acetyltransferase NatA (Nat1p, Ard1p, Nat5p) acetylates many proteins and thus affects telomeric silencing, cell cycle, heat-shock resistance, mating, and sporulation human Ard1p levels are elevated in cancer cells
YHR100C	5.23844	-0.4301	0.00735395	0.0418317	0.552541	YHR100C	758	GEP4	Mitochondrial phosphatidylglycerophosphatase (PGP phosphatase), dephosphorylates phosphatidylglycerolphosphate to generate phosphatidylglycerol, an essential step during cardiolipin biosynthesis null mutant is sensitive to tunicamycin, DTT
YDR534C	2.10015	1.0255	0.00741427	0.0421314	0.361707	YDR534C	1787	FIT1	Mannoprotein that is incorporated into the cell wall via a glycosylphosphatidylinositol (GPI) anchor, involved in the retention of siderophore-iron in the cell wall
YPL064C	4.2447	-0.466451	0.00742352	0.0421405	0.781783	YPL064C	1106	CWC27	Component of a complex containing Cef1p, putatively involved in pre-mRNA splicing has similarity to S. pombe Cwf27p
YCR034W	7.0227	0.329026	0.0075111	0.0425938	0.82136	YCR034W	1244	FEN1	Fatty acid elongase, involved in sphingolipid biosynthesis acts on fatty acids of up to 24 carbons in length mutations have regulatory effects on 1,3-beta-glucan synthase, vacuolar ATPase, and the secretory pathway
YAL008W	6.45929	-0.47042	0.00759352	0.0430169	0.203845	YAL008W	797	FUN14	Mitochondrial protein of unknown function
YDR415C	3.45096	-0.501334	0.00762422	0.0431465	0.974926	YDR415C	1325	YDR415C	Putative protein of unknown function
YPR137W	4.90236	0.438122	0.00764959	0.0432457	0.623974	YPR137W	1922	RRP9	Protein involved in pre-rRNA processing, associated with U3 snRNP component of small ribosomal subunit (SSU) processosome ortholog of the human U3-55k protein
YGR266W	5.73545	0.428262	0.00765898	0.0432544	0.430592	YGR266W	2306	YGR266W	Protein of unknown function, predicted to contain a single transmembrane domain mutant has increased aneuploidy tolerance localized to both the mitochondrial outer membrane and the plasma membrane
YMR238W	7.4595	-0.520814	0.00766979	0.0432711	0.0923925	YMR238W	1577	DFG5	Putative mannosidase, essential glycosylphosphatidylinositol (GPI)-anchored membrane protein required for cell wall biogenesis in bud formation, involved in filamentous growth, homologous to Dcw1p
YDR223W	1.26852	1.05541	0.00768629	0.0433198	0.618511	YDR223W	1604	CRF1	Transcriptional corepressor involved in repression of ribosomal protein (RP) gene transcription via the TOR signaling pathway which promotes accumulation of Crf1p in the nucleus role in repression of RP genes varies by strain
YOR061W	7.44915	0.301263	0.00769558	0.0433279	0.931551	YOR061W	1220	CKA2	Alpha' catalytic subunit of casein kinase 2 (CK2), a Ser/Thr protein kinase with roles in cell growth and proliferation CK2, comprised of CKA1, CKA2, CKB1 and CKB2, has many substrates including transcription factors and all RNA polymerase
YGL139W	2.46228	0.638376	0.00774728	0.0435594	0.97604	YGL139W	2609	FLC3	Putative FAD transporter, similar to Flc1p and Flc2p localized to the ER
YJL139C	3.11447	-0.739626	0.00775264	0.0435594	0.429877	YJL139C	1487	YUR1	Mannosyltransferase of the KTR1 family, involved in protein N-glycosylation located in the Golgi apparatus
YPR058W	6.08931	0.389655	0.00776041	0.0435594	0.550047	YPR058W	1124	YMC1	Mitochondrial protein, putative inner membrane transporter with a role in oleate metabolism and glutamate biosynthesis member of the mitochondrial carrier (MCF) family has similarity with Ymc2p
YGR235C	5.71962	-0.481862	0.00777539	0.0435681	0.239654	YGR235C	902	YGR235C	Putative protein of unknown function the authentic, non-tagged protein is detected in highly purified mitochondria in high-throughput studies
YOL007C	1.67779	0.991603	0.00777776	0.0435681	0.436003	YOL007C	1226	CSI2	Protein of unknown function green fluorescent protein (GFP)- fusion protein localizes to the mother side of the bud neck and the vacuole YOL007C is not an essential gene
YPR114W	6.71657	-0.316263	0.00780765	0.0436912	0.889947	YPR114W	1148	YPR114W	Putative protein of unknown function
YOR320C	5.92411	0.337955	0.00782254	0.0437105	0.861736	YOR320C	1676	GNT1	N-acetylglucosaminyltransferase capable of modification of N-linked glycans in the Golgi apparatus
YGL111W	5.51007	0.363695	0.00782698	0.0437105	0.813265	YGL111W	1592	NSA1	Constituent of 66S pre-ribosomal particles, involved in 60S ribosomal subunit biogenesis
YLR446W	4.06904	0.520959	0.00790299	0.0440904	0.63905	YLR446W	1502	YLR446W	Putative protein of unknown function with similarity to hexokinases transcript is upregulated during sporulation and the unfolded protein response YLR446W is not an essential gene
YBR256C	7.47424	0.310899	0.00793199	0.0442074	0.878094	YBR256C	917	RIB5	Riboflavin synthase catalyzes the last step of the riboflavin biosynthesis pathway
YNL261W	5.11464	-0.372268	0.00799117	0.0444923	0.857886	YNL261W	1640	ORC5	Subunit of the origin recognition complex, which directs DNA replication by binding to replication origins and is also involved in transcriptional silencing
YOR242C	3.6128	0.600791	0.00802133	0.0445846	0.553489	YOR242C	1316	SSP2	Sporulation specific protein that localizes to the spore wall required for sporulation at a point after meiosis II and during spore wall formation SSP2 expression is induced midway in meiosis
YGR059W	1.58587	1.20924	0.00802697	0.0445846	0.311064	YGR059W	1739	SPR3	Sporulation-specific homolog of the yeast CDC3/10/11/12 family of bud neck microfilament genes septin protein involved in sporulation regulated by ABFI
YGL226W	5.58166	-0.627633	0.00803201	0.0445846	0.0557545	YGL226W	572	MTC3	Protein of unknown function green fluorescent protein (GFP)-fusion protein localizes to the mitochondrion mtc3 is synthetically sick with cdc13-1
YHR128W	6.71204	-0.363351	0.00804493	0.0446113	0.611049	YHR128W	851	FUR1	Uracil phosphoribosyltransferase, synthesizes UMP from uracil involved in the pyrimidine salvage pathway
YDR356W	3.17538	0.725384	0.00805672	0.0446318	0.429587	YDR356W	3035	SPC110	Inner plaque spindle pole body (SPB) component, ortholog of human kendrin involved in connecting nuclear microtubules to SPB interacts with Tub4p-complex and calmodulin phosphorylated by Mps1p in cell cycle-dependent manner
YGL184C	3.98703	0.774492	0.00807888	0.0447097	0.100287	YGL184C	1598	STR3	Peroxisomal cystathionine beta-lyase, converts cystathionine into homocysteine may be redox regulated by Gto1p
YHR149C	5.12313	0.461142	0.00809085	0.044731	0.450408	YHR149C	2405	SKG6	Integral membrane protein that localizes primarily to growing sites such as the bud tip or the cell periphery potential Cdc28p substrate Skg6p interacts with Zds1p and Zds2p
YJL196C	6.14644	0.378074	0.00810003	0.0447369	0.621287	YJL196C	1133	ELO1	Elongase I, medium-chain acyl elongase, catalyzes carboxy-terminal elongation of unsaturated C12-C16 fatty acyl-CoAs to C16-C18 fatty acids
YFL001W	3.93688	-0.593115	0.00821789	0.0453424	0.412567	YFL001W	1529	DEG1	tRNA:pseudouridine synthase, introduces pseudouridines at position 38 or 39 in tRNA, important for maintenance of translation efficiency and normal cell growth, localizes to both the nucleus and cytoplasm non-essential for viability
YDR383C	2.99223	-0.635234	0.00823575	0.0453954	0.811565	YDR383C	917	NKP1	Non-essential kinetochore protein, subunit of the Ctf19 central kinetochore complex (Ctf19p-Mcm21p-Okp1p-Mcm22p-Mcm16p-Ctf3p-Chl4p-Mcm19p-Nkp1p-Nkp2p-Ame1p-Mtw1p)
YLR083C	7.75769	0.328834	0.00827385	0.0455599	0.758839	YLR083C	2204	EMP70	Protein with a role in cellular adhesion, filamentous growth, and endosome-to-vacuole sorting similar to Tmn2p and Tmn3p member of Transmembrane Nine family of proteins with 9 transmembrane segments
YMR240C	3.78593	-0.459665	0.0082922	0.0456154	0.952386	YMR240C	1511	CUS1	Protein required for assembly of U2 snRNP into the spliceosome, forms a complex with Hsh49p and Hsh155p
YPR031W	5.30873	0.460977	0.00834768	0.0458707	0.364713	YPR031W	2447	NTO1	Subunit of the NuA3 histone acetyltransferase complex that acetylates histone H3 contains PHD finger domain that interacts with methylated histone H3
YOR027W	8.3655	0.487282	0.00835525	0.0458707	0.122223	YOR027W	1970	STI1	Hsp90 cochaperone, interacts with the Ssa group of the cytosolic Hsp70 chaperones and activates Ssa1p ATPase activity interacts with Hsp90 chaperones and inhibits their ATPase activity homolog of mammalian Hop
YNL248C	5.97774	0.493031	0.0083914	0.0460233	0.178606	YNL248C	1448	RPA49	RNA polymerase I subunit A49
YOR034C-A	5.07703	-0.518532	0.00840445	0.046049	0.245131	YOR034C-A	443	YOR034C-A	Putative protein of unknown function identified by expression profiling and mass spectrometry
YML031W	7.39352	0.351201	0.00842125	0.0460952	0.626336	YML031W	2168	NDC1	Nuclear envelope protein with multiple putative transmembrane domains, required for nuclear pore complex assembly and spindle pole body duplication required for meiosis II
YDL085C-A	5.74798	-0.363	0.00850808	0.0465243	0.735468	YDL085C-A	407	YDL085C-A	Putative protein of unknown function green fluorescent protein (GFP)-fusion protein localizes to the cytoplasm and nucleus
YGR054W	7.60706	0.311557	0.0086265	0.0471252	0.851139	YGR054W	2129	YGR054W	Eukaryotic initiation factor (eIF) 2A associates specifically with both 40S subunits and 80 S ribosomes, and interacts genetically with both eIF5b and eIF4E homologous to mammalian eIF2A
YER149C	6.48179	0.333448	0.00865194	0.0471802	0.785814	YER149C	1463	PEA2	Coiled-coil polarisome protein required for polarized morphogenesis, cell fusion, and low affinity Ca2+ influx forms polarisome complex with Bni1p, Bud6p, and Spa2p localizes to sites of polarized growth
YER022W	5.41494	-0.458907	0.00865369	0.0471802	0.335088	YER022W	2264	SRB4	Subunit of the RNA polymerase II mediator complex associates with core polymerase subunits to form the RNA polymerase II holoenzyme essential for transcriptional regulation homozygosity of the human MED17 L371P mutation is associated with infantile cerebral and cerebellar atrophy with poor myelination
YJL041W	7.5031	0.319921	0.00867309	0.0472392	0.808795	YJL041W	2790	NSP1	Essential component of the nuclear pore complex, which mediates nuclear import and export, found in both the Nup82 and Nic96 complexes
YDR449C	5.04499	0.483995	0.0087215	0.047456	0.355083	YDR449C	1523	UTP6	Nucleolar protein, component of the small subunit (SSU) processome containing the U3 snoRNA that is involved in processing of pre-18S rRNA
YLR342W-A	8.68318	0.38183	0.00875268	0.0475787	0.422451	YLR342W-A	374	YLR342W-A	Putative protein of unknown function
YDR288W	4.55206	-0.496367	0.00881041	0.0478453	0.447826	YDR288W	1112	NSE3	Essential subunit of the Mms21-Smc5-Smc6 complex protein of unknown function required for DNA repair and growth
YML125C	7.11936	0.324578	0.0088479	0.0480016	0.782089	YML125C	1139	PGA3	Putative cytochrome b5 reductase, localized to the plasma membrane may be involved in regulation of lifespan required for maturation of Gas1p and Pho8p, proposed to be involved in protein trafficking
YDR461C-A	6.60255	0.400393	0.00886595	0.0480522	0.408106	YDR461C-A	443	YDR461C-A	Putative protein of unknown function
YDR267C	4.58765	-0.441752	0.00887753	0.0480677	0.685576	YDR267C	1193	CIA1	WD40 repeat protein involved in assembly of cytosolic and nuclear iron-sulfur proteins similar to the human Ciao1 protein YDR267C is an essential gene
YLR105C	4.21131	-0.514484	0.00890833	0.0481871	0.532074	YLR105C	1334	SEN2	Subunit of the tRNA splicing endonuclease, which is composed of Sen2p, Sen15p, Sen34p, and Sen54p Sen2p contains the active site for tRNA 5' splice site cleavage and has similarity to Sen34p and to Archaeal tRNA splicing endonuclease
YLR372W	8.01643	0.296461	0.00898306	0.0485438	0.913936	YLR372W	1238	SUR4	Elongase, involved in fatty acid and sphingolipid biosynthesis synthesizes very long chain 20-26-carbon fatty acids from C18-CoA primers involved in regulation of sphingolipid biosynthesis
YER001W	5.68216	0.547468	0.00900643	0.0486224	0.117939	YER001W	2489	MNN1	Alpha-1,3-mannosyltransferase, integral membrane glycoprotein of the Golgi complex, required for addition of alpha1,3-mannose linkages to N-linked and O-linked oligosaccharides, one of five S. cerevisiae proteins of the MNN1 family
YJL200C	6.76751	0.405192	0.0090181	0.0486378	0.35226	YJL200C	2570	ACO2	Putative mitochondrial aconitase isozyme similarity to Aco1p, an aconitase required for the TCA cycle expression induced during growth on glucose, by amino acid starvation via Gcn4p, and repressed on ethanol
YGR074W	4.23853	-0.506549	0.00907923	0.0489196	0.559148	YGR074W	641	SMD1	Core Sm protein Sm D1 part of heteroheptameric complex (with Smb1p, Smd2p, Smd3p, Sme1p, Smx3p, and Smx2p) that is part of the spliceosomal U1, U2, U4, and U5 snRNPs homolog of human Sm D1
YPL266W	6.91723	0.343049	0.00911408	0.0490594	0.671981	YPL266W	1157	DIM1	Essential 18S rRNA dimethylase (dimethyladenosine transferase), responsible for conserved m6(2)Am6(2)A dimethylation in 3'-terminal loop of 18S rRNA, part of 90S and 40S pre-particles in nucleolus, involved in pre-ribosomal RNA processing
YJL004C	5.00798	0.379421	0.00914396	0.0491471	0.834286	YJL004C	812	SYS1	Integral membrane protein of the Golgi required for targeting of the Arf-like GTPase Arl3p to the Golgi multicopy suppressor of ypt6 null mutation
YBR170C	5.64679	-0.335726	0.0091603	0.0491471	0.877088	YBR170C	1943	NPL4	Ubiquitin-binding protein involved in protein degradation Cdc48p-Npl4p-Ufd1p complex participates in ER-associated degradation (ERAD) while Cdc48p-Npl4p-Vms1p complex participates in mitochondria-associated degradation (MAD)
YMR218C	4.37132	0.515479	0.00916464	0.0491471	0.456866	YMR218C	3509	TRS130	One of 10 subunits of the transport protein particle (TRAPP) complex of the cis-Golgi which mediates vesicle docking and fusion involved in ER to Golgi membrane traffic mutation activates transcription of OCH1
YCR077C	5.11572	0.42893	0.00916605	0.0491471	0.546672	YCR077C	2591	PAT1	Topoisomerase II-associated deadenylation-dependent mRNA-decapping factor also required for faithful chromosome transmission, maintenance of rDNA locus stability, and protection of mRNA 3'-UTRs from trimming functionally linked to Pab1p
YDR261C	6.34554	-0.423922	0.00925271	0.0495193	0.304232	YDR261C	1889	EXG2	Exo-1,3-beta-glucanase, involved in cell wall beta-glucan assembly may be anchored to the plasma membrane via a glycosylphosphatidylinositol (GPI) anchor
YLR200W	8.42258	-0.605602	0.00925343	0.0495193	0.0283826	YLR200W	545	YKE2	Subunit of the heterohexameric Gim/prefoldin protein complex involved in the folding of alpha-tubulin, beta-tubulin, and actin
YMR035W	5.86014	0.356461	0.00933321	0.049894	0.713479	YMR035W	734	IMP2	Catalytic subunit of the mitochondrial inner membrane peptidase complex, required for maturation of mitochondrial proteins of the intermembrane space complex contains Imp1p and Imp2p (both catalytic subunits), and Som1p
YOR037W	3.58627	-0.617133	0.00934155	0.049894	0.439945	YOR037W	1301	CYC2	Mitochondrial peripheral inner membrane protein, contains a FAD cofactor in a domain exposed in the intermembrane space exhibits redox activity in vitro likely participates in ligation of heme to acytochromes c and c1 (Cyc1p and Cyt1p)

## Sheet: UP in Dset1
		avg.expression	difference	P.Value	adj.P.Val	noise.P.Value	locus_tag	Length	gene	product
	YOL155C	3.50938	3.00271	1.50499e-07	3.60674e-05	0.0376235	YOL155C	3104	HPF1	Haze-protective mannoprotein that reduces the particle size of aggregated proteins in white wines
	YAL018C	0.68313	2.96371	3.77679e-07	4.56852e-05	0.857125	YAL018C	1178	YAL018C	Putative protein of unknown function
	YHR126C	0.235841	2.78298	1.35273e-05	0.000512972	0.515077	YHR126C	680	ANS1	Putative protein of unknown function transcription dependent upon Azf1p
	YEL070W	0.732806	2.59925	2.17358e-06	0.000136145	0.83833	YEL070W	1709	DSF1	Deletion suppressor of mpt5 mutation
	YPL282C	0.443274	2.52509	1.66667e-05	0.00059269	0.674439	YPL282C	695	PAU22	Protein of unknown function, member of the seripauperin multigene family encoded mainly in subtelomeric regions identical to Pau21p encodes 2 proteins that are translated from 2 different start codons
	YGL262W	0.629048	2.38679	5.25221e-05	0.00137205	0.542861	YGL262W	728	YGL262W	Putative protein of unknown function null mutant displays elevated sensitivity to expression of a mutant huntingtin fragment or of alpha-synuclein YGL262W is not an essential gene
	YMR244W	1.08172	2.36073	0.000270046	0.00425304	0.176643	YMR244W	1268	YMR244W	Putative protein of unknown function
	YFL053W	0.114635	2.34579	0.000115003	0.00236528	0.48332	YFL053W	1976	DAK2	Dihydroxyacetone kinase, required for detoxification of dihydroxyacetone (DHA) involved in stress adaptation
	YPR007C	1.42687	2.27836	9.42155e-07	8.48873e-05	0.925893	YPR007C	2243	REC8	Meiosis-specific component of sister chromatid cohesion complex maintains cohesion between sister chromatids during meiosis I maintains cohesion between centromeres of sister chromatids until meiosis II homolog of S. pombe Rec8p
	YGL089C	1.29003	2.26231	0.000107345	0.00225834	0.176115	YGL089C	563	MF(ALPHA)2	Mating pheromone alpha-factor, made by alpha cells interacts with mating type a cells to induce cell cycle arrest and other responses leading to mating also encoded by MF(ALPHA)1, which is more highly expressed than MF(ALPHA)2
	YHR214W-A	2.75948	2.25723	1.70116e-06	0.000118693	0.29811	YHR214W-A	686	YHR214W-A	Dubious open reading frame unlikely to encode a protein, based on experimental and comparative sequence data similar to the fungal specific protein encoded by YAR068W induced by zinc deficiency
	YOL058W	4.98893	2.20861	2.25919e-08	1.77895e-05	0.104225	YOL058W	1463	ARG1	Arginosuccinate synthetase, catalyzes the formation of L-argininosuccinate from citrulline and L-aspartate in the arginine biosynthesis pathway potential Cdc28p substrate
	YJL037W	3.49016	2.20808	3.41927e-07	4.55804e-05	0.263408	YJL037W	875	IRC18	Putative protein of unknown function expression induced in respiratory-deficient cells and in carbon-limited chemostat cultures similar to adjacent ORF, YJL038C null mutant displays increased levels of spontaneous Rad52p foci
	YPL187W	0.470207	2.17278	0.000669188	0.00791537	0.229559	YPL187W	698	MF(ALPHA)1	Mating pheromone alpha-factor, made by alpha cells interacts with mating type a cells to induce cell cycle arrest and other responses leading to mating also encoded by MF(ALPHA)2, although MF(ALPHA)1 produces most alpha-factor
	YAL067C	2.29555	2.10668	4.82515e-05	0.00128484	0.144826	YAL067C	1982	SEO1	Putative permease, member of the allantoate transporter subfamily of the major facilitator superfamily mutation confers resistance to ethionine sulfoxide
	YJL038C	2.22978	1.97971	5.86281e-05	0.00147561	0.225857	YJL038C	860	LOH1	Protein of unknown function with proposed roles in maintenance of genome integrity and also in spore wall assembly induced during sporulation repressed during vegetative growth by Sum1p and Hst1p sequence similar to IRC1
	YJR047C	3.51862	1.89025	1.14037e-06	9.24372e-05	0.296827	YJR047C	674	ANB1	Translation elongation factor eIF-5A, previously thought to function in translation initiation similar to and functionally redundant with Hyp2p undergoes an essential hypusination modification expressed under anaerobic conditions
	YIL099W	3.27393	1.64607	5.01559e-06	0.000258373	0.356378	YIL099W	1850	SGA1	Intracellular sporulation-specific glucoamylase involved in glycogen degradation induced during starvation of a/a diploids late in sporulation, but dispensable for sporulation
	YNL018C	0.455301	1.63516	0.00414762	0.0277447	0.315882	YNL018C	2039	YNL018C	Putative protein of unknown function
	YEL039C	2.61734	1.62647	6.40853e-05	0.00154315	0.305348	YEL039C	542	CYC7	Cytochrome c isoform 2, expressed under hypoxic conditions electron carrier of the mitochondrial intermembrane space that transfers electrons from ubiquinone-cytochrome c oxidoreductase to cytochrome c oxidase during cellular respiration
	YDR403W	2.24493	1.57461	1.6799e-05	0.000593566	0.830706	YDR403W	1811	DIT1	Sporulation-specific enzyme required for spore wall maturation, involved in the production of a soluble LL-dityrosine-containing precursor of the spore wall transcripts accumulate at the time of prospore enclosure
	YGR087C	1.25971	1.57455	0.0011348	0.0113935	0.388102	YGR087C	1892	PDC6	Minor isoform of pyruvate decarboxylase, decarboxylates pyruvate to acetaldehyde, involved in amino acid catabolism transcription is glucose- and ethanol-dependent, and is strongly induced during sulfur limitation
	YPR194C	2.04623	1.55784	0.000547076	0.00685337	0.22066	YPR194C	2834	OPT2	Oligopeptide transporter member of the OPT family, with potential orthologs in S. pombe and C. albicans also plays a role in formation of mature vacuoles
	YDL244W	1.75761	1.52737	0.000278827	0.00434152	0.452933	YDL244W	1223	THI13	Protein involved in synthesis of the thiamine precursor hydroxymethylpyrimidine (HMP) member of a subtelomeric gene family including THI5, THI11, THI12, and THI13
	YLR307W	1.04161	1.49069	0.000901372	0.0096791	0.696203	YLR307W	1106	CDA1	Chitin deacetylase, together with Cda2p involved in the biosynthesis ascospore wall component, chitosan required for proper rigidity of the ascospore wall
	YLL046C	2.12523	1.47553	1.39806e-05	0.000517188	0.96444	YLL046C	950	RNP1	Ribonucleoprotein that contains two RNA recognition motifs (RRM)
	YOR192C-C	6.07447	1.46855	7.85896e-09	1.30274e-05	0.451755	YOR192C-C	437	YOR192C-C	Putative protein of unknown function identified by expression profiling and mass spectrometry
	YGL263W	3.40713	1.41676	1.8169e-05	0.000625923	0.407089	YGL263W	1343	COS12	Protein of unknown function, member of the DUP380 subfamily of conserved, often subtelomerically-encoded proteins
	YDR119W-A	1.88539	1.40669	0.000796097	0.00888277	0.453122	YDR119W-A	401	YDR119W-A	Putative protein of unknown function may interact with respiratory chain complexes III (ubiquinol-cytochrome c reductase) or IV (cytochrome c oxidase)
	YBR085W	2.9072	1.38081	8.93355e-06	0.000378782	0.850932	YBR085W	1124	AAC3	Mitochondrial inner membrane ADP/ATP translocator, exchanges cytosolic ADP for mitochondrially synthesized ATP expressed under anaerobic conditions similar to Pet9p and Aac1p has roles in maintenance of viability and in respiration
	YJL083W	0.792565	1.3481	0.00239859	0.0190317	0.659489	YJL083W	2015	TAX4	EH domain-containing protein involved in regulating phosphatidylinositol 4,5-bisphosphate levels and autophagy Irs4p and Tax4p bind and activate the PtdIns phosphatase Inp51p Irs4p and Tax4p are involved in localizing Atg17p to the PAS
	YPR015C	3.25116	1.34601	6.47667e-06	0.000305123	0.730531	YPR015C	944	YPR015C	Putative protein of unknown function overexpression causes a cell cycle delay or arrest
	YOL132W	1.48905	1.34321	0.00109078	0.0111547	0.694819	YOL132W	1616	GAS4	1,3-beta-glucanosyltransferase, involved with Gas2p in spore wall assembly has similarity to Gas1p localizes to the cell wall
	YFR012W-A	1.99378	1.32893	0.00258855	0.0200113	0.271334	YFR012W-A	287	YFR012W-A	Putative protein of unknown function identified by homology
	YJR095W	2.25985	1.31606	0.000602632	0.00734891	0.456802	YJR095W	1169	SFC1	Mitochondrial succinate-fumarate transporter, transports succinate into and fumarate out of the mitochondrion required for ethanol and acetate utilization
	YER096W	2.99969	1.31361	5.3336e-05	0.00137378	0.571492	YER096W	1739	SHC1	Sporulation-specific activator of Chs3p (chitin synthase III), required for the synthesis of the chitosan layer of ascospores has similarity to Skt5p, which activates Chs3p during vegetative growth transcriptionally induced at alkaline pH
	YDR374C	1.99085	1.30693	0.000141184	0.00266509	0.793906	YDR374C	1121	YDR374C	Putative protein of unknown function
	YML058W-A	3.48364	1.29798	1.092e-05	0.000442579	0.511976	YML058W-A	407	HUG1	Protein involved in the Mec1p-mediated checkpoint pathway that responds to DNA damage or replication arrest, transcription is induced by DNA damage
	YER106W	2.38149	1.28764	0.000659835	0.00787232	0.398308	YER106W	1109	MAM1	Monopolin, kinetochore associated protein involved in chromosome attachment to meiotic spindle
	YCL021W-A	4.55455	1.27027	1.69479e-07	3.73667e-05	0.7866	YCL021W-A	578	YCL021W-A	Putative protein of unknown function
	YJL088W	2.07841	1.24485	0.00149716	0.0139397	0.444811	YJL088W	1217	ARG3	Ornithine carbamoyltransferase (carbamoylphosphate:L-ornithine carbamoyltransferase), catalyzes the sixth step in the biosynthesis of the arginine precursor ornithine
	YDR014W-A	3.06755	1.24319	5.92252e-05	0.00147805	0.601935	YDR014W-A	689	HED1	Meiosis-specific protein that down-regulates Rad51p-mediated mitotic recombination when the meiotic recombination machinery is impaired early meiotic gene, transcribed specifically during meiotic prophase
	YHR185C	2.96435	1.23621	9.08738e-05	0.00205225	0.460542	YHR185C	914	PFS1	Sporulation protein required for prospore membrane formation at selected spindle poles, ensures functionality of all four spindle pole bodies during meiosis II not required for meiotic recombination or meiotic chromosome segregation
	YGR059W	1.58587	1.20924	0.00802697	0.0445846	0.311064	YGR059W	1739	SPR3	Sporulation-specific homolog of the yeast CDC3/10/11/12 family of bud neck microfilament genes septin protein involved in sporulation regulated by ABFI
	YLL041C	2.4037	1.20569	0.00103401	0.0106731	0.394904	YLL041C	1001	SDH2	Iron-sulfur protein subunit of succinate dehydrogenase (Sdh1p, Sdh2p, Sdh3p, Sdh4p), which couples the oxidation of succinate to the transfer of electrons to ubiquinone as part of the TCA cycle and the mitochondrial respiratory chain
	YBR300C	1.46999	1.19723	0.00191505	0.0163655	0.677443	YBR300C	698	YBR300C	Dubious open reading frame unlikely to encode a protein, based on available experimental and comparative sequence data partially overlaps the verified gene YBR301W YBR300C is not an essential gene
	YIL011W	6.42715	1.18451	0.000218749	0.00364324	0.0127534	YIL011W	1010	TIR3	Cell wall mannoprotein of the Srp1p/Tip1p family of serine-alanine-rich proteins expressed under anaerobic conditions and required for anaerobic growth
	YOR049C	1.23511	1.18377	0.00133997	0.0127487	0.817402	YOR049C	1265	RSB1	Suppressor of sphingoid long chain base (LCB) sensitivity of an LCB-lyase mutation putative integral membrane transporter or flippase that may transport LCBs from the cytoplasmic side toward the extracytoplasmic side of the membrane
	YML122C	0.828452	1.18178	0.00332623	0.0239481	0.875353	YML122C	581	YML122C	Dubious open reading frame unlikely to encode a protein, based on available experimental and comparative sequence data
	YOR100C	1.22109	1.17855	0.00224559	0.0181757	0.798036	YOR100C	1184	CRC1	Mitochondrial inner membrane carnitine transporter, required for carnitine-dependent transport of acetyl-CoA from peroxisomes to mitochondria during fatty acid beta-oxidation
	YKR104W	1.2296	1.16811	0.00301381	0.0224185	0.76425	YKR104W	1121	YKR104W	Putative transporter of the multidrug resistance-associated protein (MRP) subfamily contains a stop codon in S288C adjacent ORFs YKR103W and YKR104W are merged in different strain backgrounds
	YGR234W	7.87329	1.15771	9.0546e-06	0.000380984	0.0625868	YGR234W	1400	YHB1	Nitric oxide oxidoreductase, flavohemoglobin involved in nitric oxide detoxification plays a role in the oxidative and nitrosative stress responses
	YDR261W-B/YDR261W-A	5.53078	1.14497	1.18173e-08	1.30274e-05	0.962403	YDR261W-B/YDR261W-A	5514	YDR261W-B/YDR261W-A	Retrotransposon TYA Gag and TYB Pol genes transcribed/translated as one unit polyprotein is processed to make a nucleocapsid-like protein (Gag), reverse transcriptase (RT), protease (PR), and integrase (IN) similar to retroviral genes/Retrotransposon TYA Gag gene co-transcribed with TYB Pol translated as TYA or TYA-TYB polyprotein Gag is a nucleocapsid protein that is the structural constituent o…
	YIR014W	4.8715	1.14106	0.000166472	0.0030184	0.0587297	YIR014W	929	YIR014W	Putative protein of unknown function green fluorescent protein (GFP)-fusion protein localizes to the vacuole expression directly regulated by the metabolic and meiotic transcriptional regulator Ume6p YIR014W is a non-essential gene
	YDL246C	3.33612	1.12458	2.30782e-05	0.000726897	0.818806	YDL246C	1274	SOR2	Protein of unknown function protein sequence is 99% identical to the Sor1p sorbitol dehydrogenase computational analysis of large-scale protein-protein interaction data also suggests a role in fructose or mannose metabolism
	YHL044W	2.70534	1.11676	0.00165833	0.0148629	0.31308	YHL044W	908	YHL044W	Putative integral membrane protein, member of DUP240 gene family green fluorescent protein (GFP)-fusion protein localizes to the plasma membrane in a punctate pattern
	YOR378W	3.29612	1.07608	0.000518009	0.00667118	0.320036	YOR378W	1748	YOR378W	Putative paralog of ATR1, but not required for boron tolerance member of the DHA2 family of drug:H+ antiporters YOR378W is not an essential gene
	YBR301W	3.20334	1.05598	0.000808943	0.0089622	0.326334	YBR301W	563	PAU24	Cell wall mannoprotein with similarity to Tir1p, Tir2p, Tir3p, and Tir4p member of the seripauperin multigene family encoded mainly in subtelomeric regions expressed under anaerobic conditions, completely repressed during aerobic growth
	YCL026C-B	5.33997	1.05586	0.000404294	0.00568487	0.0297895	YCL026C-B	782	HBN1	Putative protein of unknown function similar to bacterial nitroreductases green fluorescent protein (GFP)-fusion protein localizes to the cytoplasm and nucleus protein becomes insoluble upon intracellular iron depletion
	YDR223W	1.26852	1.05541	0.00768629	0.0433198	0.618511	YDR223W	1604	CRF1	Transcriptional corepressor involved in repression of ribosomal protein (RP) gene transcription via the TOR signaling pathway which promotes accumulation of Crf1p in the nucleus role in repression of RP genes varies by strain
	YML110C	6.01548	1.05504	1.78711e-05	0.000619532	0.120826	YML110C	1124	COQ5	2-hexaprenyl-6-methoxy-1,4-benzoquinone methyltransferase, involved in ubiquinone (Coenzyme Q) biosynthesis localizes to the matrix face of the mitochondrial inner membrane in a large complex with other ubiquinone biosynthetic enzymes
	YJL045W	2.58968	1.042	0.000393227	0.00558626	0.834586	YJL045W	2105	YJL045W	Minor succinate dehydrogenase isozyme homologous to Sdh1p, the major isozyme reponsible for the oxidation of succinate and transfer of electrons to ubiquinone induced during the diauxic shift in a Cat8p-dependent manner
	YAR009C	8.74194	1.03618	9.0589e-07	8.32211e-05	0.319286	YAR009C	3791	YAR009C	Retrotransposon TYA Gag and TYB Pol genes in YARCTY1-1 TYB is mutant and probably non-functional
	YJR159W	3.35173	1.03503	2.92532e-05	0.0008669	0.897119	YJR159W	1274	SOR1	Sorbitol dehydrogenase expression is induced in the presence of sorbitol or xylose
	YDR534C	2.10015	1.0255	0.00741427	0.0421314	0.361707	YDR534C	1787	FIT1	Mannoprotein that is incorporated into the cell wall via a glycosylphosphatidylinositol (GPI) anchor, involved in the retention of siderophore-iron in the cell wall
	YHR056C	5.1454	1.02466	1.18503e-05	0.000466564	0.316505	YHR056C	2852	RSC30	Component of the RSC chromatin remodeling complex non-essential gene required for regulation of ribosomal protein genes and the cell wall/stress response highly similar to Rsc3p null mutants are osmosensitive
	YBR115C	6.9148	1.02017	3.5558e-07	4.55804e-05	0.519802	YBR115C	4379	LYS2	Alpha aminoadipate reductase, catalyzes the reduction of alpha-aminoadipate to alpha-aminoadipate 6-semialdehyde, which is the fifth step in biosynthesis of lysine activation requires posttranslational phosphopantetheinylation by Lys5p
	YMR045C/YMR046C	8.38454	1.01342	4.31117e-08	1.98026e-05	0.800231	YMR045C/YMR046C	5469	YMR045C/YMR046C	Retrotransposon TYA Gag and TYB Pol genes transcribed/translated as one unit polyprotein is processed to make a nucleocapsid-like protein (Gag), reverse transcriptase (RT), protease (PR), and integrase (IN) similar to retroviral genes/Retrotransposon TYA Gag gene co-transcribed with TYB Pol translated as TYA or TYA-TYB polyprotein Gag is a nucleocapsid protein that is the structural constituent o…
	YLR342W	4.07785	1.01327	0.000178648	0.00316626	0.253479	YLR342W	5831	FKS1	Catalytic subunit of 1,3-beta-D-glucan synthase, functionally redundant with alternate catalytic subunit Gsc2p binds to regulatory subunit Rho1p involved in cell wall synthesis and maintenance localizes to sites of cell wall remodeling
	YLR227W-B/YLR227W-A	8.61598	1.01262	3.34665e-08	1.98026e-05	0.839148	YLR227W-B/YLR227W-A	5469	YLR227W-B/YLR227W-A	Retrotransposon TYA Gag and TYB Pol genes transcribed/translated as one unit polyprotein is processed to make a nucleocapsid-like protein (Gag), reverse transcriptase (RT), protease (PR), and integrase (IN) similar to retroviral genes/Retrotransposon TYA Gag gene co-transcribed with TYB Pol translated as TYA or TYA-TYB polyprotein Gag is a nucleocapsid protein that is the structural constituent o…
	YGR286C	5.15916	1.01186	5.36821e-06	0.000264192	0.444087	YGR286C	1328	BIO2	Biotin synthase, catalyzes the conversion of dethiobiotin to biotin, which is the last step of the biotin biosynthesis pathway complements E. coli bioB mutant
	YBL005W-B/YBL005W-A	7.91664	1.00931	2.28611e-07	4.07195e-05	0.557411	YBL005W-B/YBL005W-A	5469	YBL005W-B/YBL005W-A	Retrotransposon TYA Gag and TYB Pol genes transcribed/translated as one unit polyprotein is processed to make a nucleocapsid-like protein (Gag), reverse transcriptase (RT), protease (PR), and integrase (IN) similar to retroviral genes/Retrotransposon TYA Gag gene co-transcribed with TYB Pol translated as TYA or TYA-TYB polyprotein Gag is a nucleocapsid protein that is the structural constituent o…
	YKL103C	7.10473	1.00749	0.00012146	0.00246664	0.0371233	YKL103C	1745	LAP4	Vacuolar aminopeptidase yscI zinc metalloproteinase that belongs to the peptidase family M18 often used as a marker protein in studies of autophagy and cytosol to vacuole targeting (CVT) pathway
	YKL071W	2.35477	0.999772	0.00213204	0.0175869	0.641242	YKL071W	971	YKL071W	Putative protein of unknown function expression induced in cells treated with the mycotoxin patulin, and also the quinone methide triterpene celastrol green fluorescent protein (GFP)-fusion protein localizes to the cytoplasm
	YOL007C	1.67779	0.991603	0.00777776	0.0435681	0.436003	YOL007C	1226	CSI2	Protein of unknown function green fluorescent protein (GFP)- fusion protein localizes to the mother side of the bud neck and the vacuole YOL007C is not an essential gene
	YJR156C	1.94743	0.974154	0.00621043	0.0373303	0.585038	YJR156C	1223	THI11	Protein involved in synthesis of the thiamine precursor hydroxymethylpyrimidine (HMP) member of a subtelomeric gene family including THI5, THI11, THI12, and THI13
	YFL011W	2.3799	0.973303	0.00241423	0.019035	0.660616	YFL011W	1841	HXT10	Putative hexose transporter, expressed at low levels and expression is repressed by glucose
	YBR148W	4.28398	0.967382	1.24176e-06	9.64027e-05	0.98961	YBR148W	2030	YSW1	Protein required for normal prospore membrane formation interacts with Gip1p, which is the meiosis-specific regulatory subunit of the Glc7p protein phosphatase expressed specifically in spores and localizes to the prospore membrane
	YLR157C-B/YLR157C-A	9.19912	0.962162	1.2791e-07	3.52519e-05	0.766603	YLR157C-B/YLR157C-A	5469	YLR157C-B/YLR157C-A	Retrotransposon TYA Gag and TYB Pol genes transcribed/translated as one unit polyprotein is processed to make a nucleocapsid-like protein (Gag), reverse transcriptase (RT), protease (PR), and integrase (IN) similar to retroviral genes/Retrotransposon TYA Gag gene co-transcribed with TYB Pol translated as TYA or TYA-TYB polyprotein Gag is a nucleocapsid protein that is the structural constituent o…
	YDR182W-A	2.53855	0.96026	0.00204568	0.0171104	0.593158	YDR182W-A	404	YDR182W-A	Putative protein of unknown function identified by fungal homology and RT-PCR
	YER138C/YER137C-A	9.20599	0.953909	3.39509e-07	4.55804e-05	0.632064	YER138C/YER137C-A	5469	YER138C/YER137C-A	Retrotransposon TYA Gag and TYB Pol genes transcribed/translated as one unit polyprotein is processed to make a nucleocapsid-like protein (Gag), reverse transcriptase (RT), protease (PR), and integrase (IN) similar to retroviral genes/Retrotransposon TYA Gag gene co-transcribed with TYB Pol translated as TYA or TYA-TYB polyprotein Gag is a nucleocapsid protein that is the structural constituent o…
	YMR101C	3.16739	0.953496	0.000407309	0.00571269	0.681049	YMR101C	1232	SRT1	Cis-prenyltransferase involved in synthesis of long-chain dolichols (19-22 isoprene units as opposed to Rer2p which synthesizes shorter-chain dolichols) localizes to lipid bodies transcription is induced during stationary phase
	YPR137C-B/YPR137C-A	8.91096	0.95226	1.18079e-07	3.52519e-05	0.790219	YPR137C-B/YPR137C-A	5469	YPR137C-B/YPR137C-A	Retrotransposon TYA Gag and TYB Pol genes transcribed/translated as one unit polyprotein is processed to make a nucleocapsid-like protein (Gag), reverse transcriptase (RT), protease (PR), and integrase (IN) similar to retroviral genes/Retrotransposon TYA Gag gene co-transcribed with TYB Pol translated as TYA or TYA-TYB polyprotein Gag is a nucleocapsid protein that is the structural constituent o…
	YPL119C-A	2.29202	0.950942	0.00337494	0.0241975	0.649271	YPL119C-A	464	YPL119C-A	Putative protein of unknown function identified by expression profiling and mass spectrometry
	YOR192C-B/YOR192C-A	4.82197	0.950462	1.61005e-06	0.000115255	0.879415	YOR192C-B/YOR192C-A	5514	YOR192C-B/YOR192C-A	Retrotransposon TYA Gag and TYB Pol genes transcribed/translated as one unit polyprotein is processed to make a nucleocapsid-like protein (Gag), reverse transcriptase (RT), protease (PR), and integrase (IN) similar to retroviral genes/Retrotransposon TYA Gag gene co-transcribed with TYB Pol translated as TYA or TYA-TYB polyprotein Gag is a nucleocapsid protein that is the structural constituent o…
	YNL195C	2.92761	0.947477	0.00320056	0.0232737	0.331549	YNL195C	986	YNL195C	Putative protein of unknown function shares a promoter with YNL194C the authentic, non-tagged protein is detected in highly purified mitochondria in high-throughput studies
	YER084W	3.40533	0.945248	0.000185112	0.00324947	0.728763	YER084W	587	YER084W	Dubious open reading frame unlikely to encode a protein, based on available experimental and comparative sequence data
	YLL008W	9.03585	0.944691	0.000119961	0.00244922	0.0517423	YLL008W	2459	DRS1	Nucleolar DEAD-box protein required for ribosome assembly and function, including synthesis of 60S ribosomal subunits constituent of 66S pre-ribosomal particles
	YML039W/YML040W	9.19712	0.936098	2.43785e-07	4.07195e-05	0.724679	YML039W/YML040W	5469	YML039W/YML040W	Retrotransposon TYA Gag and TYB Pol genes transcribed/translated as one unit polyprotein is processed to make a nucleocapsid-like protein (Gag), reverse transcriptase (RT), protease (PR), and integrase (IN) similar to retroviral genes/Retrotransposon TYA Gag gene co-transcribed with TYB Pol translated as TYA or TYA-TYB polyprotein Gag is a nucleocapsid protein that is the structural constituent o…
	YDL093W	5.49682	0.933688	0.000136926	0.00261154	0.12004	YDL093W	2432	PMT5	Protein O-mannosyltransferase, transfers mannose residues from dolichyl phosphate-D-mannose to protein serine/threonine residues acts in a complex with Pmt3p, can instead interact with Pmt2p in some conditions target for new antifungals
	YJR109C	5.60875	0.932669	8.03967e-06	0.000348935	0.400954	YJR109C	3557	CPA2	Large subunit of carbamoyl phosphate synthetase, which catalyzes a step in the synthesis of citrulline, an arginine precursor
	YDR326C	4.14136	0.932513	0.000121721	0.00246664	0.459221	YDR326C	4517	YSP2	Protein involved in programmed cell death mutant shows resistance to cell death induced by amiodarone or intracellular acidification
	YPL257W-B/YPL257W-A	9.2073	0.922386	2.31165e-07	4.07195e-05	0.764426	YPL257W-B/YPL257W-A	5469	YPL257W-B/YPL257W-A	Retrotransposon TYA Gag and TYB Pol genes transcribed/translated as one unit polyprotein is processed to make a nucleocapsid-like protein (Gag), reverse transcriptase (RT), protease (PR), and integrase (IN) similar to retroviral genes/Retrotransposon TYA Gag gene co-transcribed with TYB Pol translated as TYA or TYA-TYB polyprotein Gag is a nucleocapsid protein that is the structural constituent o…
	YIL066C	3.70426	0.920933	0.000102551	0.00221672	0.747819	YIL066C	2810	RNR3	Minor isoform of the large subunit of ribonucleotide-diphosphate reductase the RNR complex catalyzes rate-limiting step in dNTP synthesis, regulated by DNA replication and DNA damage checkpoint pathways via localization of small subunits
	YJR027W/YJR026W	8.95599	0.912885	2.82439e-07	4.44802e-05	0.746226	YJR027W/YJR026W	5469	YJR027W/YJR026W	Retrotransposon TYA Gag and TYB Pol genes transcribed/translated as one unit polyprotein is processed to make a nucleocapsid-like protein (Gag), reverse transcriptase (RT), protease (PR), and integrase (IN) similar to retroviral genes/Retrotransposon TYA Gag gene co-transcribed with TYB Pol translated as TYA or TYA-TYB polyprotein Gag is a nucleocapsid protein that is the structural constituent o…
	YBR047W	2.58852	0.903829	0.00102777	0.0106542	0.859812	YBR047W	728	FMP23	Putative protein of unknown function proposed to be involved in iron or copper homeostasis the authentic, non-tagged protein is detected in highly purified mitochondria in high-throughput studies
	YBR196C-B	1.76012	0.903397	0.00686059	0.0399742	0.819198	YBR196C-B	305	YBR196C-B	Putative protein of unknown function identified by expression profiling and mass spectrometry
	YHR055C	8.53048	0.898232	5.83783e-06	0.00027981	0.310692	YHR055C	386	CUP1-2	Metallothionein, binds copper and mediates resistance to high concentrations of copper and cadmium locus is variably amplified in different strains, with two copies, CUP1-1 and CUP1-2, in the genomic sequence reference strain S288C
	YMR062C	5.46584	0.898009	1.5772e-05	0.000571943	0.399332	YMR062C	1526	ARG7	Mitochondrial ornithine acetyltransferase, catalyzes the fifth step in arginine biosynthesis also possesses acetylglutamate synthase activity, regenerates acetylglutamate while forming ornithine
	YFR030W	5.35227	0.897854	0.000416782	0.00575438	0.0824189	YFR030W	3308	MET10	Subunit alpha of assimilatory sulfite reductase, which converts sulfite into sulfide
	YHR053C	8.462	0.891456	3.3445e-06	0.00019203	0.398676	YHR053C	386	CUP1-1	Metallothionein, binds copper and mediates resistance to high concentrations of copper and cadmium locus is variably amplified in different strains, with two copies, CUP1-1 and CUP1-2, in the genomic sequence reference strain S288C
	YDR091C	5.42636	0.88835	9.80053e-05	0.00214367	0.199312	YDR091C	2027	RLI1	Essential iron-sulfur protein required for ribosome biogenesis and translation initiation and termination facilitates binding of a multifactor complex (MFC) of initiation factors to the small ribosomal subunit predicted ABC family ATPase
	YBR045C	3.63337	0.880612	0.000399843	0.00564487	0.578692	YBR045C	2120	GIP1	Meiosis-specific regulatory subunit of the Glc7p protein phosphatase, regulates spore wall formation and septin organization, required for expression of some late meiotic genes and for normal localization of Glc7p
	YJR078W/YJR079W	5.38395	0.880048	2.40857e-05	0.000750058	0.387685	YJR078W/YJR079W	2580	BNA2/YJR079W	Putative tryptophan 2,3-dioxygenase or indoleamine 2,3-dioxygenase, required for de novo biosynthesis of NAD from tryptophan via kynurenine interacts genetically with telomere capping gene CDC13 regulated by Hst1p and Aftp/Putative protein of unknown function mutation results in impaired mitochondrial respiration
	YDR365W-B/YDR365W-A	8.93239	0.879341	3.21548e-07	4.55804e-05	0.801803	YDR365W-B/YDR365W-A	5469	YDR365W-B/YDR365W-A	Retrotransposon TYA Gag and TYB Pol genes transcribed/translated as one unit polyprotein is processed to make a nucleocapsid-like protein (Gag), reverse transcriptase (RT), protease (PR), and integrase (IN) similar to retroviral genes/Retrotransposon TYA Gag gene co-transcribed with TYB Pol translated as TYA or TYA-TYB polyprotein Gag is a nucleocapsid protein that is the structural constituent o…
	YGR260W	6.9809	0.873788	2.98155e-07	4.53876e-05	0.854311	YGR260W	1805	TNA1	High affinity nicotinic acid plasma membrane permease, responsible for uptake of low levels of nicotinic acid expression of the gene increases in the absence of extracellular nicotinic acid or para-aminobenzoate (PABA)
	YNL202W	2.36208	0.868568	0.00511883	0.0323768	0.653649	YNL202W	1079	SPS19	Peroxisomal 2,4-dienoyl-CoA reductase, auxiliary enzyme of fatty acid beta-oxidation homodimeric enzyme required for growth and sporulation on petroselineate medium expression induced during late sporulation and in the presence of oleate
	YJR029W/YJR028W	9.06747	0.863809	3.80212e-07	4.56852e-05	0.815816	YJR029W/YJR028W	5469	YJR029W/YJR028W	Retrotransposon TYA Gag and TYB Pol genes transcribed/translated as one unit polyprotein is processed to make a nucleocapsid-like protein (Gag), reverse transcriptase (RT), protease (PR), and integrase (IN) similar to retroviral genes/Retrotransposon TYA Gag gene co-transcribed with TYB Pol translated as TYA or TYA-TYB polyprotein Gag is a nucleocapsid protein that is the structural constituent o…
	YPL189W	2.29492	0.854522	0.00347434	0.0246468	0.796886	YPL189W	2030	GUP2	Probable membrane protein with a possible role in proton symport of glycerol member of the MBOAT family of putative membrane-bound O-acyltransferases Gup1p homolog
	YHR054C	5.21769	0.852388	1.99329e-05	0.000666901	0.536101	YHR054C	1265	YHR054C	Putative protein of unknown function
	YCR014C	5.24154	0.847546	0.000471371	0.00624566	0.115678	YCR014C	1949	POL4	DNA polymerase IV, undergoes pair-wise interactions with Dnl4p-Lif1p and Rad27p to mediate repair of DNA double-strand breaks by non-homologous end joining (NHEJ) homologous to mammalian DNA polymerase beta
	YCL030C	6.76854	0.843891	2.43709e-05	0.000754677	0.262828	YCL030C	2600	HIS4	Multifunctional enzyme containing phosphoribosyl-ATP pyrophosphatase, phosphoribosyl-AMP cyclohydrolase, and histidinol dehydrogenase activities catalyzes the second, third, ninth and tenth steps in histidine biosynthesis
	YLR304C	8.20365	0.842995	4.43738e-05	0.00119896	0.16977	YLR304C	2537	ACO1	Aconitase, required for the tricarboxylic acid (TCA) cycle and also independently required for mitochondrial genome maintenance phosphorylated component of the mitochondrial nucleoid mutation leads to glutamate auxotrophy
	YOR032C	2.98694	0.835273	0.00361486	0.02535	0.4865	YOR032C	1505	HMS1	Basic helix-loop-helix (bHLH) protein with similarity to myc-family transcription factors overexpression confers hyperfilamentous growth and suppresses the pseudohyphal filamentation defect of a diploid mep1 mep2 homozygous null mutant
	YPR158W	3.47555	0.834062	0.00673581	0.0395397	0.171062	YPR158W	959	CUR1	Protein of unknown function involved in destabilization of [URE3] prions similar in sequence to Btn2p
	YNL214W	2.02751	0.832822	0.00726745	0.0414681	0.825943	YNL214W	800	PEX17	Peroxisomal membrane peroxin and subunit of the docking complex that facilitates the import of peroxisomal matrix proteins required for peroxisome biogenesis
	YGR027W-B/YGR027W-A	9.1578	0.828911	8.15635e-07	7.88733e-05	0.786033	YGR027W-B/YGR027W-A	5469	YGR027W-B/YGR027W-A	Retrotransposon TYA Gag and TYB Pol genes transcribed/translated as one unit polyprotein is processed to make a nucleocapsid-like protein (Gag), reverse transcriptase (RT), protease (PR), and integrase (IN) similar to retroviral genes/Retrotransposon TYA Gag gene co-transcribed with TYB Pol translated as TYA or TYA-TYB polyprotein Gag is a nucleocapsid protein that is the structural constituent o…
	YLR035C-A	7.74157	0.827256	4.21852e-05	0.00116263	0.197114	YLR035C-A	3668	YLR035C-A	Retrotransposon TYA Gag and TYB Pol genes polyprotein is processed to make a nucleocapsid-like protein (Gag), reverse transcriptase (RT), protease (PR), and integrase (IN) YLR035C-A is part of a mutant retrotransposon
	YOR341W	5.90805	0.807781	9.15918e-05	0.00205225	0.245929	YOR341W	5195	RPA190	RNA polymerase I largest subunit A190
	YOR142W-B/YOR142W-A	7.94614	0.806207	2.3299e-07	4.07195e-05	0.959874	YOR142W-B/YOR142W-A	5469	YOR142W-B/YOR142W-A	Retrotransposon TYA Gag and TYB Pol genes transcribed/translated as one unit polyprotein is processed to make a nucleocapsid-like protein (Gag), reverse transcriptase (RT), protease (PR), and integrase (IN) similar to retroviral genes/Retrotransposon TYA Gag gene co-transcribed with TYB Pol translated as TYA or TYA-TYB polyprotein Gag is a nucleocapsid protein that is the structural constituent o…
	YBR054W	4.41488	0.802596	0.00632147	0.0377507	0.0570112	YBR054W	1235	YRO2	Protein of unknown function with similarity to archaeal rhodopsins the authentic, non-tagged protein is detected in a phosphorylated state in highly purified mitochondria in high-throughput studies transcriptionally regulated by Haa1p
	YDR107C	4.23038	0.79969	9.38998e-05	0.002087	0.712972	YDR107C	2219	TMN2	Protein with a role in cellular adhesion and filamentous growth similar to Emp70p and Tmn3p member of the evolutionarily conserved Transmembrane Nine family of proteins with nine membrane-spanning segments
	YNL134C	7.87379	0.797615	2.1082e-06	0.00013486	0.702043	YNL134C	1331	YNL134C	Putative protein of unknown function with similarity to dehydrogenases from other model organisms green fluorescent protein (GFP)-fusion protein localizes to both the cytoplasm and nucleus and is induced by the DNA-damaging agent MMS
	YOR328W	3.69163	0.796487	0.000931465	0.00989255	0.550339	YOR328W	4895	PDR10	ATP-binding cassette (ABC) transporter, multidrug transporter involved in the pleiotropic drug resistance network regulated by Pdr1p and Pdr3p
	YCR048W	7.32621	0.791418	0.00150242	0.01395	0.0292071	YCR048W	2033	ARE1	Acyl-CoA:sterol acyltransferase, isozyme of Are2p endoplasmic reticulum enzyme that contributes the major sterol esterification activity in the absence of oxygen
	YAL024C	6.07008	0.791156	1.25759e-05	0.000488156	0.557599	YAL024C	4508	LTE1	Protein similar to GDP/GTP exchange factors but without detectable GEF activity required for asymmetric localization of Bfa1p at daughter-directed spindle pole bodies and for mitotic exit at low temperatures
	YOL103W-B/YOL103W-A	8.89403	0.789343	1.85745e-06	0.00012503	0.746885	YOL103W-B/YOL103W-A	5469	YOL103W-B/YOL103W-A	Retrotransposon TYA Gag and TYB Pol genes transcribed/translated as one unit polyprotein is processed to make a nucleocapsid-like protein (Gag), reverse transcriptase (RT), protease (PR), and integrase (IN) similar to retroviral genes/Retrotransposon TYA Gag gene co-transcribed with TYB Pol translated as TYA or TYA-TYB polyprotein Gag is a nucleocapsid protein that is the structural constituent o…
	YOR202W/YOR203W/YOR204W	7.14956	0.789162	1.02167e-05	0.000421133	0.478413	YOR202W/YOR203W/YOR204W	2980	HIS3/YOR203W/DED1	Imidazoleglycerol-phosphate dehydratase, catalyzes the sixth step in histidine biosynthesis mutations cause histidine auxotrophy and sensitivity to Cu, Co, and Ni salts transcription is regulated by general amino acid control via Gcn4p/Dubious open reading frame unlikely to encode a protein, based on available experimental and comparative sequence data overlaps 5' end of essential DED1 gene requi…
	YJR137C	4.58402	0.787661	0.000417809	0.00575438	0.34381	YJR137C	4529	MET5	Sulfite reductase beta subunit, involved in amino acid biosynthesis, transcription repressed by methionine
	YGR019W	4.18596	0.784652	0.000282576	0.00438466	0.590438	YGR019W	1616	UGA1	Gamma-aminobutyrate (GABA) transaminase (4-aminobutyrate aminotransferase) involved in the 4-aminobutyrate and glutamate degradation pathways required for normal oxidative stress tolerance and nitrogen utilization
	YNL163C	4.81595	0.784348	4.76815e-06	0.000247944	0.985231	YNL163C	3533	RIA1	Cytoplasmic GTPase involved in biogenesis of the 60S ribosome has similarity to translation elongation factor 2 (Eft1p and Eft2p)
	YGR161C-D/YGR161C-C	7.9295	0.78246	2.60939e-07	4.23029e-05	0.976647	YGR161C-D/YGR161C-C	5469	YGR161C-D/YGR161C-C	Retrotransposon TYA Gag and TYB Pol genes transcribed/translated as one unit polyprotein is processed to make a nucleocapsid-like protein (Gag), reverse transcriptase (RT), protease (PR), and integrase (IN) similar to retroviral genes/Retrotransposon TYA Gag gene co-transcribed with TYB Pol translated as TYA or TYA-TYB polyprotein Gag is a nucleocapsid protein that is the structural constituent o…
	YNR031C	6.17285	0.78052	0.000275705	0.00431729	0.143235	YNR031C	4940	SSK2	MAP kinase kinase kinase of the HOG1 mitogen-activated signaling pathway interacts with Ssk1p, leading to autophosphorylation and activation of Ssk2p which phosphorylates Pbs2p also mediates actin cytoskeleton recovery from osmotic stress
	YDL241W	4.62177	0.778952	0.00103345	0.0106731	0.206004	YDL241W	572	YDL241W	Putative protein of unknown function YDL241W is not an essential gene
	YGL184C	3.98703	0.774492	0.00807888	0.0447097	0.100287	YGL184C	1598	STR3	Peroxisomal cystathionine beta-lyase, converts cystathionine into homocysteine may be redox regulated by Gto1p
	YLL028W	6.3708	0.772749	0.00167633	0.0149756	0.0420693	YLL028W	1961	TPO1	Polyamine transporter that recognizes spermine, putrescine, and spermidine catalyzes uptake of polyamines at alkaline pH and excretion at acidic pH phosphorylation enhances activity and sorting to the plasma membrane
	YHR174W	12.2428	0.768218	0.000169418	0.00304524	0.236727	YHR174W	1514	ENO2	Enolase II, a phosphopyruvate hydratase that catalyzes the conversion of 2-phosphoglycerate to phosphoenolpyruvate during glycolysis and the reverse reaction during gluconeogenesis expression is induced in response to glucose
	YMR050C/YMR051C	8.86369	0.766838	4.06808e-06	0.000217702	0.674108	YMR050C/YMR051C	5469	YMR050C/YMR051C	Retrotransposon TYA Gag and TYB Pol genes transcribed/translated as one unit polyprotein is processed to make a nucleocapsid-like protein (Gag), reverse transcriptase (RT), protease (PR), and integrase (IN) similar to retroviral genes/Retrotransposon TYA Gag gene co-transcribed with TYB Pol translated as TYA or TYA-TYB polyprotein Gag is a nucleocapsid protein that is the structural constituent o…
	YDR011W	6.46162	0.765102	0.000175683	0.00312375	0.185577	YDR011W	4706	SNQ2	Plasma membrane ATP-binding cassette (ABC) transporter, multidrug transporter involved in multidrug resistance and resistance to singlet oxygen species
	YLR356W	5.67795	0.758138	9.61609e-05	0.00212016	0.35691	YLR356W	794	ATG33	Mitochondrial mitophagy-specific protein required primarily for mitophagy induced at the post-log phase not required for other types of selective autophagy or macroautophagy conserved within fungi, but not in higher eukaryotes
	YNL284C-B/YNL284C-A	8.02036	0.757652	4.45067e-07	5.11085e-05	0.970866	YNL284C-B/YNL284C-A	5469	YNL284C-B/YNL284C-A	Retrotransposon TYA Gag and TYB Pol genes transcribed/translated as one unit polyprotein is processed to make a nucleocapsid-like protein (Gag), reverse transcriptase (RT), protease (PR), and integrase (IN) similar to retroviral genes/Retrotransposon TYA Gag gene co-transcribed with TYB Pol translated as TYA or TYA-TYB polyprotein Gag is a nucleocapsid protein that is the structural constituent o…
	YPR047W	3.04418	0.757392	0.00117767	0.0116961	0.919843	YPR047W	1610	MSF1	Mitochondrial phenylalanyl-tRNA synthetase, active as a monomer, unlike the cytoplasmic subunit which is active as a dimer complexed to a beta subunit dimer similar to the alpha subunit of E. coli phenylalanyl-tRNA synthetase
	YAR035W	5.44654	0.756098	0.00135264	0.0127831	0.091262	YAR035W	2264	YAT1	Outer mitochondrial carnitine acetyltransferase, minor ethanol-inducible enzyme involved in transport of activated acyl groups from the cytoplasm into the mitochondrial matrix phosphorylated
	YGR161W-B/YGR161W-A	5.94533	0.750939	5.1075e-06	0.000260219	0.846281	YGR161W-B/YGR161W-A	5514	YGR161W-B/YGR161W-A	Retrotransposon TYA Gag and TYB Pol genes transcribed/translated as one unit polyprotein is processed to make a nucleocapsid-like protein (Gag), reverse transcriptase (RT), protease (PR), and integrase (IN) similar to retroviral genes/Retrotransposon TYA Gag gene co-transcribed with TYB Pol translated as TYA or TYA-TYB polyprotein Gag is a nucleocapsid protein that is the structural constituent o…
	YLR218C	4.81921	0.750541	0.000131909	0.00256134	0.577138	YLR218C	653	COA4	Twin Cx(9)C protein involved in cytochrome c oxidase assembly or stability localizes to the mitochondrial intermembrane space via the Mia40p-Erv1p system interacts genetically with CYC1 and with cytochrome c oxidase assembly factors
	YGL117W	3.89823	0.748437	0.00475658	0.0305931	0.232646	YGL117W	998	YGL117W	Putative protein of unknown function
	YMR069W	4.53577	0.747193	0.00617188	0.0371805	0.0730663	YMR069W	1058	NAT4	N alpha-acetyl-transferase, involved in acetylation of the N-terminal residues of histones H4 and H2A
	YER014W	5.71164	0.746453	0.000620063	0.00749514	0.134676	YER014W	1820	HEM14	Protoporphyrinogen oxidase, a mitochondrial enzyme that catalyzes the seventh step in the heme biosynthetic pathway, converting protoporphyrinogen IX to protoporphyrin IX inhibited by diphenyl ether-type herbicides
	YDR135C	7.70226	0.743863	1.46065e-06	0.000107348	0.894188	YDR135C	4748	YCF1	Vacuolar glutathione S-conjugate transporter of the ATP-binding cassette family, has a role in detoxifying metals such as cadmium, mercury, and arsenite also transports unconjugated bilirubin similar to human cystic fibrosis protein CFTR
	YIL060W	4.97116	0.741728	0.000125293	0.00251132	0.548365	YIL060W	635	YIL060W	Putative protein of unknown function mutant accumulates less glycogen than does wild type null mutation results in a decrease in plasma membrane electron transport YIL060W is not an essential gene
	YOR343W-B/YOR343W-A	7.05462	0.74156	1.27786e-05	0.000492558	0.577564	YOR343W-B/YOR343W-A	5514	YOR343W-B/YOR343W-A	Retrotransposon TYA Gag and TYB Pol genes transcribed/translated as one unit polyprotein is processed to make a nucleocapsid-like protein (Gag), reverse transcriptase (RT), protease (PR), and integrase (IN) similar to retroviral genes/Retrotransposon TYA Gag gene co-transcribed with TYB Pol translated as TYA or TYA-TYB polyprotein Gag is a nucleocapsid protein that is the structural constituent o…
	YHR020W	6.64084	0.734957	0.000111077	0.00231914	0.288701	YHR020W	2267	YHR020W	Protein of unknown function that may interact with ribosomes, based on co-purification experiments has similarity to proline-tRNA ligase YHR020W is an essential gene
	YPL141C	5.48646	0.732723	0.00372092	0.0256692	0.0567729	YPL141C	2798	FRK1	Putative protein kinase similar to Kin4p green fluorescent protein (GFP)-fusion protein localizes to the cytoplasm interacts with rRNA transcription and ribosome biogenesis factors and the long chain fatty acyl-CoA synthetase Faa3
	YOR375C	8.88477	0.727304	0.000171387	0.00306717	0.192352	YOR375C	1565	GDH1	NADP(+)-dependent glutamate dehydrogenase, synthesizes glutamate from ammonia and alpha-ketoglutarate rate of alpha-ketoglutarate utilization differs from Gdh3p expression regulated by nitrogen and carbon sources
	YPR158C-D/YPR158C-C	8.62117	0.726697	9.70229e-07	8.48873e-05	0.956821	YPR158C-D/YPR158C-C	5469	YPR158C-D/YPR158C-C	Retrotransposon TYA Gag and TYB Pol genes transcribed/translated as one unit polyprotein is processed to make a nucleocapsid-like protein (Gag), reverse transcriptase (RT), protease (PR), and integrase (IN) similar to retroviral genes/Retrotransposon TYA Gag gene co-transcribed with TYB Pol translated as TYA or TYA-TYB polyprotein Gag is a nucleocapsid protein that is the structural constituent o…
	YDR356W	3.17538	0.725384	0.00805672	0.0446318	0.429587	YDR356W	3035	SPC110	Inner plaque spindle pole body (SPB) component, ortholog of human kendrin involved in connecting nuclear microtubules to SPB interacts with Tub4p-complex and calmodulin phosphorylated by Mps1p in cell cycle-dependent manner
	YER069W	4.83764	0.724044	7.4973e-05	0.00175852	0.754108	YER069W	2792	ARG5,6	Protein that is processed in the mitochondrion to yield acetylglutamate kinase and N-acetyl-gamma-glutamyl-phosphate reductase, which catalyze the 2nd and 3rd steps in arginine biosynthesis enzymes form a complex with Arg2p
	YDR261C-D/YDR261C-C	8.68169	0.722569	1.86002e-06	0.00012503	0.903475	YDR261C-D/YDR261C-C	5016	YDR261C-D/YDR261C-C	Retrotransposon TYA Gag and TYB Pol genes in YDRCTY1-3 TYB is mutant and probably non-functional/Retrotransposon TYA Gag gene co-transcribed with TYB Pol in YDRCTY1-3 TYB is mutant and probably non-functional
	YER086W	10.4083	0.719189	2.41537e-06	0.00014959	0.93201	YER086W	1931	ILV1	Threonine deaminase, catalyzes the first step in isoleucine biosynthesis expression is under general amino acid control ILV1 locus exhibits highly positioned nucleosomes whose organization is independent of known ILV1 regulation
	YDR316W-B/YDR316W-A	8.55307	0.717167	2.48093e-06	0.000151943	0.878735	YDR316W-B/YDR316W-A	5469	YDR316W-B/YDR316W-A	Retrotransposon TYA Gag and TYB Pol genes transcribed/translated as one unit polyprotein is processed to make a nucleocapsid-like protein (Gag), reverse transcriptase (RT), protease (PR), and integrase (IN) similar to retroviral genes/Retrotransposon TYA Gag gene co-transcribed with TYB Pol translated as TYA or TYA-TYB polyprotein Gag is a nucleocapsid protein that is the structural constituent o…
	YPR158W-B/YPR158W-A	8.54843	0.714103	1.58396e-06	0.000114879	0.934445	YPR158W-B/YPR158W-A	5472	YPR158W-B/YPR158W-A	Retrotransposon TYA Gag and TYB Pol genes transcribed/translated as one unit polyprotein is processed to make a nucleocapsid-like protein (Gag), reverse transcriptase (RT), protease (PR), and integrase (IN) similar to retroviral genes/Retrotransposon TYA Gag gene co-transcribed with TYB Pol translated as TYA or TYA-TYB polyprotein Gag is a nucleocapsid protein that is the structural constituent o…
	YER004W	4.87903	0.710589	0.000307302	0.00467915	0.492693	YER004W	896	FMP52	Protein of unknown function, localized to the mitochondrial outer membrane induced by treatment with 8-methoxypsoralen and UVA irradiation
	YMR191W	4.652	0.709555	0.000668349	0.00791537	0.408713	YMR191W	1322	SPG5	Protein required for survival at high temperature during stationary phase not required for growth on nonfermentable carbon sources
	YHR214C-B/YHR214C-C	7.44611	0.709062	1.0238e-05	0.000421133	0.687862	YHR214C-B/YHR214C-C	5583	YHR214C-B/YHR214C-C	Retrotransposon TYA Gag and TYB Pol genes transcribed/translated as one unit polyprotein is processed to make a nucleocapsid-like protein (Gag), reverse transcriptase (RT), protease (PR), and integrase (IN) similar to retroviral genes/Retrotransposon TYA Gag gene co-transcribed with TYB Pol translated as TYA or TYA-TYB polyprotein Gag is a nucleocapsid protein that is the structural constituent o…
	YIL123W	8.29064	0.707384	0.00057826	0.00711083	0.1095	YIL123W	1631	SIM1	Protein of the SUN family (Sim1p, Uth1p, Nca3p, Sun4p) that may participate in DNA replication, promoter contains SCB regulation box at -300 bp indicating that expression may be cell cycle-regulated
	YNL088W	7.52623	0.704553	0.00111451	0.0112719	0.0732943	YNL088W	4487	TOP2	Topoisomerase II, relieves torsional strain in DNA by cleaving and re-sealing the phosphodiester backbone of both positively and negatively supercoiled DNA cleaves complementary strands localizes to axial cores in meiosis
	YML045W/YML045W-A	8.02775	0.702132	9.59208e-07	8.48873e-05	0.982401	YML045W/YML045W-A	5469	YML045W/YML045W-A	Retrotransposon TYA Gag and TYB Pol genes transcribed/translated as one unit polyprotein is processed to make a nucleocapsid-like protein (Gag), reverse transcriptase (RT), protease (PR), and integrase (IN) similar to retroviral genes/Retrotransposon TYA Gag gene co-transcribed with TYB Pol translated as TYA or TYA-TYB polyprotein Gag is a nucleocapsid protein that is the structural constituent o…
	YER028C	4.15175	0.700074	0.000533339	0.00675808	0.718431	YER028C	1385	MIG3	Probable transcriptional repressor involved in response to toxic agents such as hydroxyurea that inhibit ribonucleotide reductase phosphorylation by Snf1p or the Mec1p pathway inactivates Mig3p, allowing induction of damage response genes
	YLR189C	4.1524	0.698115	0.000334082	0.00493688	0.813017	YLR189C	3797	ATG26	UDP-glucose:sterol glucosyltransferase, conserved enzyme involved in synthesis of sterol glucoside membrane lipids in contrast to ATG26 from P. pastoris, S. cerevisiae ATG26 is not involved in autophagy
	YLR181C	5.41599	0.697516	0.000515265	0.00665382	0.279214	YLR181C	1193	VTA1	Multivesicular body (MVB) protein involved in endosomal protein sorting regulates Vps4p activity by promoting its oligomerization has an N-terminal Vps60- and Did2- binding domain, a linker region, and a C-terminal Vps4p binding domain
	YBL107W-A	5.63592	0.69675	4.85003e-05	0.00128526	0.663564	YBL107W-A	305	YBL107W-A	Dubious open reading frame unlikely to encode a protein, based on available experimental and comparative sequence data completely overlaps the Ty2 LTR YBLWdelta2
	YKR069W	4.71929	0.69223	0.000754031	0.00855189	0.404654	YKR069W	1982	MET1	S-adenosyl-L-methionine uroporphyrinogen III transmethylase, involved in the biosynthesis of siroheme, a prosthetic group used by sulfite reductase required for sulfate assimilation and methionine biosynthesis
	YAR010C	7.26106	0.689838	7.97021e-06	0.000348665	0.799791	YAR010C	1523	YAR010C	Retrotransposon TYA Gag gene co-transcribed with TYB Pol in YARCTY1-1 TYB is mutant and probably non-functional
	YHR146W	8.86	0.685112	9.12505e-05	0.00205225	0.359154	YHR146W	1598	CRP1	Protein that binds to cruciform DNA structures
	YHR208W	7.92761	0.682737	2.0681e-05	0.000676293	0.630309	YHR208W	1382	BAT1	Mitochondrial branched-chain amino acid (BCAA) aminotransferase, preferentially involved in BCAA biosynthesis homolog of murine ECA39 highly expressed during logarithmic phase and repressed during stationary phase
	YKR081C	7.23661	0.682144	1.99063e-05	0.000666901	0.665491	YKR081C	1235	RPF2	Essential protein involved in the processing of pre-rRNA and the assembly of the 60S ribosomal subunit interacts with ribosomal protein L11 localizes predominantly to the nucleolus constituent of 66S pre-ribosomal particles
	YDL168W	6.02251	0.682109	0.000315824	0.00475634	0.284433	YDL168W	1361	SFA1	Bifunctional enzyme containing both alcohol dehydrogenase and glutathione-dependent formaldehyde dehydrogenase activities, functions in formaldehyde detoxification and formation of long chain and complex alcohols, regulated by Hog1p-Sko1p
	YDR210W-B/YDR210W-A	6.64917	0.68076	4.08828e-05	0.00113239	0.580291	YDR210W-B/YDR210W-A	5514	YDR210W-B/YDR210W-A	Retrotransposon TYA Gag and TYB Pol genes transcribed/translated as one unit polyprotein is processed to make a nucleocapsid-like protein (Gag), reverse transcriptase (RT), protease (PR), and integrase (IN) similar to retroviral genes/Retrotransposon TYA Gag gene co-transcribed with TYB Pol translated as TYA or TYA-TYB polyprotein Gag is a nucleocapsid protein that is the structural constituent o…
	YJR016C	7.52589	0.680049	3.36476e-05	0.000968657	0.55799	YJR016C	1958	ILV3	Dihydroxyacid dehydratase, catalyzes third step in the common pathway leading to biosynthesis of branched-chain amino acids
	YFL002W-A/YFL002W-B	5.97686	0.679845	7.76554e-06	0.000345191	0.939712	YFL002W-A/YFL002W-B	5514	YFL002W-A/YFL002W-B	Retrotransposon TYA Gag and TYB Pol genes transcribed/translated as one unit polyprotein is processed to make a nucleocapsid-like protein (Gag), reverse transcriptase (RT), protease (PR), and integrase (IN) similar to retroviral genes/Retrotransposon TYA Gag gene co-transcribed with TYB Pol translated as TYA or TYA-TYB polyprotein Gag is a nucleocapsid protein that is the structural constituent o…
	YDR031W	4.06733	0.678546	0.000294806	0.00453902	0.905969	YDR031W	566	MIC14	Mitochondrial intermembrane space protein, required for normal oxygen consumption contains twin cysteine-x9-cysteine motifs
	YML047W-A	5.68665	0.673602	0.000440795	0.00596969	0.320331	YML047W-A	566	YML047W-A	Dubious open reading frame unlikely to encode a functional protein, based on available experimental and comparative sequence data
	YIR027C	3.50264	0.673377	0.00140822	0.0131822	0.872838	YIR027C	1583	DAL1	Allantoinase, converts allantoin to allantoate in the first step of allantoin degradation expression sensitive to nitrogen catabolite repression
	YKR066C	5.29703	0.671926	0.00119353	0.0118284	0.224716	YKR066C	1286	CCP1	Mitochondrial cytochrome-c peroxidase degrades reactive oxygen species in mitochondria, involved in the response to oxidative stress
	YDR158W	9.00731	0.668829	0.000388581	0.00553451	0.194068	YDR158W	1298	HOM2	Aspartic beta semi-aldehyde dehydrogenase, catalyzes the second step in the common pathway for methionine and threonine biosynthesis expression regulated by Gcn4p and the general control of amino acid synthesis
	YMR076C	5.80459	0.666771	0.00365834	0.025525	0.0756643	YMR076C	4034	PDS5	Protein required for establishment and maintenance of sister chromatid condensation and cohesion, colocalizes with cohesin on chromosomes, may function as a protein-protein interaction scaffold also required during meiosis
	YJR143C	6.88017	0.664876	0.000146732	0.0027346	0.368726	YJR143C	2489	PMT4	Protein O-mannosyltransferase, transfers mannose residues from dolichyl phosphate-D-mannose to protein serine/threonine residues appears to form homodimers in vivo and does not complex with other Pmt proteins target for new antifungals
	YBR241C	5.98691	0.662898	0.00112107	0.0113174	0.152618	YBR241C	1667	YBR241C	Putative transporter, member of the sugar porter family green fluorescent protein (GFP)-fusion protein localizes to the vacuolar membrane YBR241C is not an essential gene
	YER042W	6.18325	0.662381	0.000265501	0.00421273	0.342154	YER042W	755	MXR1	Methionine-S-sulfoxide reductase, involved in the response to oxidative stress protects iron-sulfur clusters from oxidative inactivation along with MXR2 involved in the regulation of lifespan
	YJR092W	4.67361	0.661798	0.00132477	0.0126335	0.382946	YJR092W	4544	BUD4	Involved in bud-site selection and required for the axial budding pattern localizes with septins to bud neck in mitosis and may constitute an axial landmark for next round of budding required for the formation of a double septin ring, and generally for the organization of septin structures potential Cdc28p substrate
	YLR352W	4.89306	0.65691	5.70471e-05	0.0014424	0.939837	YLR352W	2624	YLR352W	Putative protein of unknown function with similarity to F-box proteins interacts with Skp1p and Cdc53p YLR352W is not an essential gene
	YOL070C	7.03753	0.655047	0.00352603	0.0248535	0.056719	YOL070C	1706	NBA1	Protein of unknown function, localizes to the bud neck and cytoplasm interacts with Nap1p may interact with ribosomes, based on co-purification experiments potential Cdc28p substrate
	YDR325W	4.3771	0.65373	0.000540819	0.00680592	0.735871	YDR325W	3308	YCG1	Subunit of the condensin complex required for establishment and maintenance of chromosome condensation, chromosome segregation and chromatin binding of the condensin complex required for clustering of tRNA genes at the nucleolus
	YCR011C	6.96239	0.647232	3.37413e-05	0.000968657	0.692041	YCR011C	3350	ADP1	Putative ATP-dependent permease of the ABC transporter family of proteins
	YIL013C	4.15194	0.645329	0.00509645	0.0322892	0.300463	YIL013C	4436	PDR11	ATP-binding cassette (ABC) transporter, multidrug transporter involved in multiple drug resistance mediates sterol uptake when sterol biosynthesis is compromisedregulated by Pdr1p required for anaerobic growth
	YGR038C-B/YGR038C-A	8.23418	0.644853	3.42976e-06	0.000194086	0.973059	YGR038C-B/YGR038C-A	5469	YGR038C-B/YGR038C-A	Retrotransposon TYA Gag and TYB Pol genes transcribed/translated as one unit polyprotein is processed to make a nucleocapsid-like protein (Gag), reverse transcriptase (RT), protease (PR), and integrase (IN) similar to retroviral genes/Retrotransposon TYA Gag gene co-transcribed with TYB Pol translated as TYA or TYA-TYB polyprotein Gag is a nucleocapsid protein that is the structural constituent o…
	YGR162W	5.41548	0.644605	0.00530446	0.0332252	0.0808647	YGR162W	3059	TIF4631	Translation initiation factor eIF4G, subunit of the mRNA cap-binding protein complex (eIF4F) that also contains eIF4E (Cdc33p) interacts with Pab1p and with eIF4A (Tif1p) also has a role in biogenesis of the large ribosomal subunit
	YKR092C	5.78548	0.644085	0.00113872	0.0114121	0.214385	YKR092C	1421	SRP40	Nucleolar, serine-rich protein with a role in preribosome assembly or transport may function as a chaperone of small nucleolar ribonucleoprotein particles (snoRNPs) immunologically and structurally to rat Nopp140
	YGL139W	2.46228	0.638376	0.00774728	0.0435594	0.97604	YGL139W	2609	FLC3	Putative FAD transporter, similar to Flc1p and Flc2p localized to the ER
	YHR023W	5.17236	0.636657	0.00273426	0.0207743	0.199632	YHR023W	5987	MYO1	Type II myosin heavy chain, required for wild-type cytokinesis and cell separation localizes to the actomyosin ring binds to myosin light chains Mlc1p and Mlc2p through its IQ1 and IQ2 motifs respectively
	YJL092W	5.33065	0.63018	8.49272e-05	0.0019424	0.846085	YJL092W	3725	SRS2	DNA helicase and DNA-dependent ATPase involved in DNA repair, needed for proper timing of commitment to meiotic recombination and transition from Meiosis I to II blocks trinucleotide repeat expansion affects genome stability
	YAR007C	4.2156	0.625462	0.00534107	0.0333787	0.313783	YAR007C	2066	RFA1	Subunit of heterotrimeric Replication Protein A (RPA), which is a highly conserved single-stranded DNA binding protein involved in DNA replication, repair, and recombination
	YKL195W	5.73816	0.623236	0.000233342	0.00381655	0.549848	YKL195W	1412	MIA40	Essential protein of the mitochondrial intermembrane space (IMS) promotes retention of newly imported proteins may do so by stabilizing client protein folding as part of a disulfide relay system or transferring metal to client proteins
	YER058W	4.00403	0.621842	0.00410956	0.0275995	0.506069	YER058W	524	PET117	Protein required for assembly of cytochrome c oxidase
	YMR181C	3.43524	0.621025	0.00330258	0.023827	0.868122	YMR181C	665	YMR181C	Protein of unknown function mRNA transcribed as part of a bicistronic transcript with a predicted transcriptional repressor RGM1/YMR182C mRNA is destroyed by nonsense-mediated decay (NMD) YMR181C is not an essential gene
	YJL109C	7.73565	0.618342	0.00031092	0.00470822	0.329833	YJL109C	5510	UTP10	Nucleolar protein, component of the small subunit (SSU) processome containing the U3 snoRNA that is involved in processing of pre-18S rRNA mutant has increased aneuploidy tolerance
	YCL051W	3.8598	0.618066	0.00170678	0.0151494	0.83697	YCL051W	1952	LRE1	Protein involved in control of cell wall structure and stress response overproduction confers resistance to cell-wall degrading enzymes exhibits genetic interactions with genes involved in the cell wall integrity pathway
	YHR114W	4.99236	0.617111	0.00690154	0.0400857	0.125987	YHR114W	2102	BZZ1	SH3 domain protein implicated in the regulation of actin polymerization, able to recruit actin polymerization machinery through its SH3 domains, colocalizes with cortical actin patches and Las17p, interacts with type I myosins
	YHR083W	6.62353	0.615895	0.000943452	0.00994726	0.212309	YHR083W	1190	SAM35	Essential component of the sorting and assembly machinery (SAM complex or TOB complex) of the mitochondrial outer membrane, which binds precursors of beta-barrel proteins and facilitates their insertion into the outer membrane
	YMR229C	9.03997	0.612848	0.000418633	0.00575438	0.295044	YMR229C	5390	RRP5	RNA binding protein with preference for single stranded tracts of U's involved in synthesis of both 18S and 5.8S rRNAs component of both the ribosomal small subunit (SSU) processosome and the 90S preribosome
	YOL004W	6.92818	0.612792	5.14584e-06	0.000260219	0.992999	YOL004W	4811	SIN3	Component of the Sin3p-Rpd3p histone deacetylase complex, involved in transcriptional repression and activation of diverse processes, including mating-type switching and meiosis involved in the maintenance of chromosomal integrity
	YPR151C	4.33101	0.611872	0.000473095	0.00625348	0.908148	YPR151C	821	SUE1	Mitochondrial protein required for degradation of unstable forms of cytochrome c
	YPL015C	5.07009	0.611552	0.000804377	0.00893897	0.509009	YPL015C	1274	HST2	Cytoplasmic member of the silencing information regulator 2 (Sir2) family of NAD(+)-dependent protein deacetylases modulates nucleolar (rDNA) and telomeric silencing possesses NAD(+)-dependent histone deacetylase activity in vitro
	YMR309C	4.98452	0.608983	0.000372898	0.00540899	0.728699	YMR309C	2639	NIP1	eIF3c subunit of the eukaryotic translation initiation factor 3 (eIF3), involved in the assembly of preinitiation complex and start codon selection
	YPL226W	7.47132	0.608444	0.000262775	0.00418617	0.392144	YPL226W	3791	NEW1	ATP binding cassette protein that cosediments with polysomes and is required for biogenesis of the small ribosomal subunit Asn/Gln-rich rich region supports [NU+] prion formation and susceptibility to [PSI+] prion induction
	YLR348C	7.33806	0.607032	0.00376517	0.025942	0.0714004	YLR348C	1097	DIC1	Mitochondrial dicarboxylate carrier, integral membrane protein, catalyzes a dicarboxylate-phosphate exchange across the inner mitochondrial membrane, transports cytoplasmic dicarboxylates into the mitochondrial matrix
	YDL157C	6.28923	0.606503	0.000376958	0.00542505	0.410873	YDL157C	557	YDL157C	Putative protein of unknown function the authentic, non-tagged protein is detected in highly purified mitochondria in high-throughput studies
	YDR036C	4.96731	0.605451	0.00238642	0.0189812	0.316075	YDR036C	1703	EHD3	3-hydroxyisobutyryl-CoA hydrolase, member of a family of enoyl-CoA hydratase/isomerases non-tagged protein is detected in highly purified mitochondria in high-throughput studies phosphorylated mutation affects fluid-phase endocytosis
	YNL054W-A	6.57361	0.604752	0.000935095	0.009912	0.238114	YNL054W-A	1523	YNL054W-A	Retrotransposon TYA Gag gene co-transcribed with TYB Pol translated as TYA or TYA-TYB polyprotein Gag is a nucleocapsid protein that is the structural constituent of virus-like particles (VLPs) similar to retroviral Gag
	YNL219C	5.68902	0.604245	0.000240487	0.00389872	0.622659	YNL219C	1868	ALG9	Mannosyltransferase, involved in N-linked glycosylation catalyzes the transfer of mannose from Dol-P-Man to lipid-linked oligosaccharides mutation of the human ortholog causes type 1 congenital disorders of glycosylation
	YOR242C	3.6128	0.600791	0.00802133	0.0445846	0.553489	YOR242C	1316	SSP2	Sporulation specific protein that localizes to the spore wall required for sporulation at a point after meiosis II and during spore wall formation SSP2 expression is induced midway in meiosis
	YDL230W	4.28603	0.600067	0.00240336	0.0190335	0.588224	YDL230W	1208	PTP1	Phosphotyrosine-specific protein phosphatase that dephosphorylates a broad range of substrates in vivo, including Fpr3p localized to the cytoplasm and the mitochondria proposed to be a negative regulator of filamentation
	YIL038C	6.00826	0.599439	0.000416627	0.00575438	0.460256	YIL038C	2711	NOT3	Subunit of the CCR4-NOT complex, which is a global transcriptional regulator with roles in transcription initiation and elongation and in mRNA degradation
	YPL128C	3.89875	0.598682	0.00185772	0.0161002	0.838799	YPL128C	1889	TBF1	Telobox-containing general regulatory factor binds TTAGGG repeats within subtelomeric anti-silencing regions (STARs), blocking silent chromatin propagation binds majority of snoRNA gene promoters, required for full snoRNA expression
	YER141W	6.03508	0.598582	0.000642157	0.00772832	0.365332	YER141W	1661	COX15	Protein required for the hydroxylation of heme O to form heme A, which is an essential prosthetic group for cytochrome c oxidase
	YNL132W	6.43649	0.596764	0.000105349	0.00224402	0.693852	YNL132W	3371	KRE33	Essential protein, required for biogenesis of the small ribosomal subunit heterozygous mutant shows haploinsufficiency in K1 killer toxin resistance
	YOR229W	6.20148	0.594908	0.000165518	0.003011	0.652475	YOR229W	1604	WTM2	Transcriptional modulator involved in regulation of meiosis, silencing, and expression of RNR genes involved in response to replication stress contains WD repeats
	YDR098C-B/YDR098C-A	8.22105	0.594765	1.14135e-05	0.000452598	0.95814	YDR098C-B/YDR098C-A	5469	YDR098C-B/YDR098C-A	Retrotransposon TYA Gag and TYB Pol genes transcribed/translated as one unit polyprotein is processed to make a nucleocapsid-like protein (Gag), reverse transcriptase (RT), protease (PR), and integrase (IN) similar to retroviral genes/Retrotransposon TYA Gag gene co-transcribed with TYB Pol translated as TYA or TYA-TYB polyprotein Gag is a nucleocapsid protein that is the structural constituent o…
	YCR012W	12.0718	0.594698	0.000482526	0.00631753	0.465037	YCR012W	1451	PGK1	3-phosphoglycerate kinase, catalyzes transfer of high-energy phosphoryl groups from the acyl phosphate of 1,3-bisphosphoglycerate to ADP to produce ATP key enzyme in glycolysis and gluconeogenesis
	YLR154C-G	7.60727	0.593505	0.0067069	0.0394962	0.0474666	YLR154C-G	350	YLR154C-G	Putative protein of unknown function identified by fungal homology comparisons and RT-PCR this ORF is contained within RDN25-2 and RDN37-2
	YBR235W	6.34158	0.591304	2.00845e-05	0.000666901	0.966042	YBR235W	3563	YBR235W	Putative ion transporter, similar to mammalian electroneutral Na(+)-(K+)-C1- cotransporter family YBR235W is not an essential gene
	YGR132C	5.8856	0.591069	0.00322337	0.0234087	0.152652	YGR132C	1064	PHB1	Subunit of the prohibitin complex (Phb1p-Phb2p), a 1.2 MDa ring-shaped inner mitochondrial membrane chaperone that stabilizes newly synthesized proteins determinant of replicative life span involved in mitochondrial segregation
	YBL014C	5.54359	0.589853	0.000317104	0.00476261	0.660458	YBL014C	2885	RRN6	Component of the core factor (CF) rDNA transcription factor complex CF is required for transcription of 35S rRNA genes by RNA polymerase I and is composed of Rrn6p, Rrn7p, and Rrn11p
	YJR017C	7.25889	0.589242	3.15279e-05	0.00092437	0.869354	YJR017C	713	ESS1	Peptidylprolyl-cis/trans-isomerase (PPIase) specific for phosphorylated serine and threonine residues N-terminal to proline regulates phosphorylation of the RNA polymerase II large subunit (Rpo21p) C-terminal domain
	YMR108W	7.58605	0.588181	5.50351e-05	0.00140468	0.765606	YMR108W	2264	ILV2	Acetolactate synthase, catalyses the first common step in isoleucine and valine biosynthesis and is the target of several classes of inhibitors, localizes to the mitochondria expression of the gene is under general amino acid control
	YGR231C	6.82689	0.587276	0.000105712	0.00224402	0.68531	YGR231C	1133	PHB2	Subunit of the prohibitin complex (Phb1p-Phb2p), a 1.2 MDa ring-shaped inner mitochondrial membrane chaperone that stabilizes newly synthesized proteins determinant of replicative life span involved in mitochondrial segregation
	YPR145W	8.2505	0.586874	1.7407e-05	0.000607262	0.932895	YPR145W	1919	ASN1	Asparagine synthetase, isozyme of Asn2p catalyzes the synthesis of L-asparagine from L-aspartate in the asparagine biosynthetic pathway
	YDR507C	6.72092	0.585402	0.00482168	0.0309036	0.0861224	YDR507C	3629	GIN4	Protein kinase involved in bud growth and assembly of the septin ring, proposed to have kinase-dependent and kinase-independent activities undergoes autophosphorylation similar to Kcc4p and Hsl1p
	YPR112C	7.64511	0.585289	0.000699723	0.00805816	0.278175	YPR112C	2864	MRD1	Essential conserved protein that is part of the 90S preribosome required for production of 18S rRNA and small ribosomal subunit contains five consensus RNA-binding domains
	YPL093W	6.71651	0.583665	0.000302916	0.0046509	0.485362	YPL093W	2144	NOG1	Putative GTPase that associates with free 60S ribosomal subunits in the nucleolus and is required for 60S ribosomal subunit biogenesis constituent of 66S pre-ribosomal particles member of the ODN family of nucleolar G-proteins
	YBR222C	7.23491	0.583664	0.000460256	0.0061576	0.365569	YBR222C	1832	PCS60	Peroxisomal protein that binds AMP and mRNA, localizes to both the peroxisomal peripheral membrane and matrix, expression is highly inducible by oleic acid, similar to E. coli long chain acyl-CoA synthetase
	YLR256W	7.95062	0.583201	1.64679e-05	0.000589423	0.948482	YLR256W	4709	HAP1	Zinc finger transcription factor involved in the complex regulation of gene expression in response to levels of heme and oxygen the S288C sequence differs from other strain backgrounds due to a Ty1 insertion in the carboxy terminus
	YIL125W	5.59578	0.583054	0.0031857	0.0231963	0.190596	YIL125W	3245	KGD1	Component of the mitochondrial alpha-ketoglutarate dehydrogenase complex, which catalyzes a key step in the tricarboxylic acid (TCA) cycle, the oxidative decarboxylation of alpha-ketoglutarate to form succinyl-CoA
	YJL217W	7.57091	0.582972	0.00610848	0.0369177	0.0596134	YJL217W	797	REE1	Cytoplasmic protein involved in the regulation of enolase (ENO1) mRNA expression is induced by calcium shortage, copper deficiency (via Mac1p) and the presence of galactose (via Gal4p) mRNA expression is also regulated by the cell cycle
	YLR222C-A/YLR223C	5.56321	0.58168	0.000553465	0.00691768	0.542049	YLR222C-A/YLR223C	3685	YLR222C-A/IFH1	Dubious open reading frame unlikely to encode a protein, based on available experimental and comparative sequence data partially overlaps the verified gene IFH1/Coactivator that regulates transcription of ribosomal protein (RP) genes recruited to RP gene promoters during optimal growth conditions via Fhl1p subunit of CURI, a complex that coordinates RP production and pre-rRNA processing
	YDR133C	9.93359	0.580959	0.00588212	0.0360247	0.0701697	YDR133C	536	YDR133C	Dubious open reading frame unlikely to encode a protein, based on available experimental and comparative sequence data partially overlaps YDR134C
	YBR043C	5.61647	0.57978	0.000716657	0.00819546	0.47355	YBR043C	2270	QDR3	Multidrug transporter of the major facilitator superfamily, has a role in polyamine homeostasis expression is upregulated under polyamine stress required for resistance to quinidine, barban, cisplatin, and bleomycin
	YDL132W	5.29889	0.577216	0.000939146	0.00993584	0.515569	YDL132W	2648	CDC53	Cullin, structural protein of SCF complexes (which also contain Skp1p, Cdc34p, Hrt1p and an F-box protein) involved in ubiquitination SCF promotes the G1-S transition by targeting G1 cyclins and the Cln-CDK inhibitor Sic1p for degradation
	YBR029C	6.42315	0.576068	0.000159271	0.00291662	0.681931	YBR029C	1574	CDS1	Phosphatidate cytidylyltransferase (CDP-diglyceride synthetase) an enzyme that catalyzes that conversion of CTP + phosphate into diphosphate + CDP-diaclglyerol, a critical step in the synthesis of all major yeast phospholipids
	YPL041C	4.12426	0.575889	0.00362622	0.0253576	0.648705	YPL041C	824	YPL041C	Protein of unknown function involved in maintenance of proper telomere length
	YDR210C-D/YDR210C-C	8.15909	0.574823	1.99762e-05	0.000666901	0.943941	YDR210C-D/YDR210C-C	5469	YDR210C-D/YDR210C-C	Retrotransposon TYA Gag and TYB Pol genes transcribed/translated as one unit polyprotein is processed to make a nucleocapsid-like protein (Gag), reverse transcriptase (RT), protease (PR), and integrase (IN) similar to retroviral genes/Retrotransposon TYA Gag gene co-transcribed with TYB Pol translated as TYA or TYA-TYB polyprotein Gag is a nucleocapsid protein that is the structural constituent o…
	YGL009C	7.54994	0.574718	3.9088e-05	0.00108815	0.872744	YGL009C	2540	LEU1	Isopropylmalate isomerase, catalyzes the second step in the leucine biosynthesis pathway
	YGR103W	7.94524	0.574118	8.21777e-05	0.00188735	0.731375	YGR103W	2018	NOP7	Component of several different pre-ribosomal particles forms a complex with Ytm1p and Erb1p that is required for maturation of the large ribosomal subunit required for exit from G0 and the initiation of cell proliferation
	YDR069C	4.39631	0.571359	0.000777096	0.00875149	0.900197	YDR069C	2981	DOA4	Ubiquitin isopeptidase, required for recycling ubiquitin from proteasome-bound ubiquitinated intermediates, acts at the late endosome/prevacuolar compartment to recover ubiquitin from ubiquitinated membrane proteins en route to the vacuole
	YJR061W	4.31461	0.57118	0.00491348	0.0314189	0.477572	YJR061W	3008	YJR061W	Putative protein of unknown function non-essential gene with similarity to Mnn4, a putative membrane protein involved in glycosylation transcription repressed by Rm101p
	YGL047W	5.57796	0.569992	5.50456e-05	0.00140468	0.976316	YGL047W	809	ALG13	Catalytic component of UDP-GlcNAc transferase, required for the second step of dolichyl-linked oligosaccharide synthesis anchored to the ER membrane via interaction with Alg14p similar to bacterial and human glycosyltransferases
	YJL138C	9.29207	0.569653	0.000202233	0.00347261	0.579797	YJL138C	1388	TIF2	Translation initiation factor eIF4A, identical to Tif1p DEA(D/H)-box RNA helicase that couples ATPase activity to RNA binding and unwinding forms a dumbbell structure of two compact domains connected by a linker interacts with eIF4G
	YFL037W	7.1896	0.568295	0.000145379	0.00272562	0.668382	YFL037W	1574	TUB2	Beta-tubulin associates with alpha-tubulin (Tub1p and Tub3p) to form tubulin dimer, which polymerizes to form microtubules
	YJR006W	4.69603	0.567521	0.00177146	0.0156479	0.601945	YJR006W	1664	POL31	DNA polymerase III (delta) subunit, essential for cell viability involved in DNA replication and DNA repair
	YGR211W	6.9004	0.563544	0.000847832	0.00927232	0.329446	YGR211W	1661	ZPR1	Essential protein with two zinc fingers, present in the nucleus of growing cells but relocates to the cytoplasm in starved cells via a process mediated by Cpr1p binds to translation elongation factor eEF-1 (Tef1p)
	YML124C	6.41645	0.562328	0.000277075	0.00432645	0.612879	YML124C	1836	TUB3	Alpha-tubulin associates with beta-tubulin (Tub2p) to form tubulin dimer, which polymerizes to form microtubules expressed at lower level than Tub1p
	YIL064W	6.40372	0.562098	0.000201189	0.00346548	0.689065	YIL064W	974	SEE1	Probable lysine methyltransferase involved in the dimethylation of eEF1A (Tef1p/Tef2p) sequence similarity to S-adenosylmethionine-dependent methyltransferases of the seven beta-strand family role in vesicular transport
	YGL094C	5.30651	0.559289	0.00603	0.0365653	0.180957	YGL094C	3548	PAN2	Essential subunit of the Pan2p-Pan3p poly(A)-ribonuclease complex, which acts to control poly(A) tail length and regulate the stoichiometry and activity of postreplication repair complexes
	YPL240C	9.78959	0.558106	0.00700528	0.0404326	0.0726759	YPL240C	2330	HSP82	Hsp90 chaperone required for pheromone signaling and negative regulation of Hsf1p docks with Tom70p for mitochondrial preprotein delivery promotes telomerase DNA binding and nucleotide addition interacts with Cns1p, Cpr6p, Cpr7p, Sti1p
	YBR012W-B/YBR012W-A	7.09891	0.557953	2.27588e-05	0.000725124	0.974019	YBR012W-B/YBR012W-A	5472	YBR012W-B/YBR012W-A	Retrotransposon TYA Gag and TYB Pol genes transcribed/translated as one unit polyprotein is processed to make a nucleocapsid-like protein (Gag), reverse transcriptase (RT), protease (PR), and integrase (IN) similar to retroviral genes/Retrotransposon TYA Gag gene co-transcribed with TYB Pol translated as TYA or TYA-TYB polyprotein Gag is a nucleocapsid protein that is the structural constituent o…
	YDR146C	4.87487	0.557926	0.00512202	0.0323768	0.303214	YDR146C	2330	SWI5	Transcription factor that activates transcription of genes expressed at the M/G1 phase boundary and in G1 phase localization to the nucleus occurs during G1 and appears to be regulated by phosphorylation by Cdc28p kinase
	YDL101C	4.96128	0.557262	0.00169534	0.0150925	0.545616	YDL101C	1742	DUN1	Cell-cycle checkpoint serine-threonine kinase required for DNA damage-induced transcription of certain target genes, phosphorylation of Rad55p and Sml1p, and transient G2/M arrest after DNA damage also regulates postreplicative DNA repair
	YDL171C	5.45725	0.553683	0.00205224	0.0171307	0.364832	YDL171C	6638	GLT1	NAD(+)-dependent glutamate synthase (GOGAT), synthesizes glutamate from glutamine and alpha-ketoglutarate with Gln1p, forms the secondary pathway for glutamate biosynthesis from ammonia expression regulated by nitrogen source
	YDR465C	6.17283	0.551894	0.00290398	0.0218373	0.205672	YDR465C	1439	RMT2	Arginine N5 methyltransferase methylates ribosomal protein Rpl12 (L12) on Arg67
	YPL208W	3.61263	0.55176	0.00590226	0.0361027	0.853819	YPL208W	1952	RKM1	SET-domain lysine-N-methyltransferase, catalyzes the formation of dimethyllysine residues on the large ribsomal subunit protein L23a (RPL23A and RPL23B)
	YLR203C	7.1637	0.551719	0.000762018	0.00862473	0.36764	YLR203C	1511	MSS51	Specific translational activator for the mitochondrial COX1 mRNA loosely associated with the matrix face of the mitochondrial inner membrane influences both COX1 mRNA translation and Cox1p assembly into cytochrome c oxidase
	YOL138C	7.94274	0.5512	0.000152656	0.00282362	0.693414	YOL138C	4226	RTC1	Subunit of the SEA (Seh1-associated) complex, a coatomer-related complex that associates dynamically with the vacuole null mutation suppresses cdc13-1 temperature sensitivity has N-terminal WD-40 repeats and a C-terminal RING motif
	YAL029C	6.49344	0.550284	0.000218259	0.00364324	0.697417	YAL029C	4616	MYO4	One of two type V myosin motors (along with MYO2) involved in actin-based transport of cargos required for mRNA transport, including ASH1 mRNA, and facilitating the growth and movement of ER tubules into the growing bud along with She3p
	YLR201C/YLR202C	5.30836	0.548592	0.00431578	0.0285577	0.264528	YLR201C/YLR202C	1326	COQ9/YLR202C	Protein required for ubiquinone (coenzyme Q) biosynthesis and respiratory growth localizes to the matrix face of the mitochondrial inner membrane in a large complex with ubiquinone biosynthetic enzymes/Dubious open reading frame unlikely to encode a protein, based on available experimental and comparative sequence data partially overlaps the verified ORF YLR201C ORF contains a putative intron
	YJL093C	5.86596	0.548218	0.000140214	0.00265588	0.878876	YJL093C	2276	TOK1	Outward-rectifier potassium channel of the plasma membrane with two pore domains in tandem, each of which forms a functional channel permeable to potassium carboxy tail functions to prevent inner gate closures target of K1 toxin
	YOL060C	4.94741	0.547558	0.00233171	0.0187382	0.503655	YOL060C	2321	MAM3	Protein required for normal mitochondrial morphology, has similarity to hemolysins
	YER001W	5.68216	0.547468	0.00900643	0.0486224	0.117939	YER001W	2489	MNN1	Alpha-1,3-mannosyltransferase, integral membrane glycoprotein of the Golgi complex, required for addition of alpha1,3-mannose linkages to N-linked and O-linked oligosaccharides, one of five S. cerevisiae proteins of the MNN1 family
	YMR186W	10.0125	0.545941	0.000906367	0.00968483	0.377118	YMR186W	2318	HSC82	Cytoplasmic chaperone of the Hsp90 family, redundant in function and nearly identical with Hsp82p, and together they are essential expressed constitutively at 10-fold higher basal levels than HSP82 and induced 2-3 fold by heat shock
	YGR128C	7.27758	0.545748	0.00236579	0.0189376	0.192678	YGR128C	2342	UTP8	Nucleolar protein required for export of tRNAs from the nucleus also copurifies with the small subunit (SSU) processome containing the U3 snoRNA that is involved in processing of pre-18S rRNA
	YER017C	6.41933	0.545589	0.000114882	0.00236528	0.85755	YER017C	2486	AFG3	Component, with Yta12p, of the mitochondrial inner membrane m-AAA protease that mediates degradation of misfolded or unassembled proteins and is also required for correct assembly of mitochondrial enzyme complexes
	YOR057W	5.44433	0.544114	0.000540306	0.00680592	0.724642	YOR057W	1388	SGT1	Cochaperone protein regulates activity of adenylyl cyclase Cyr1p involved in kinetochore complex assembly associates with the SCF (Skp1p/Cdc53p/F box protein) ubiquitin ligase complex acts as a linker between Skp1p and HSP90 complexes
	YJR045C	11.1229	0.54209	0.000124954	0.00251132	0.876145	YJR045C	2165	SSC1	Hsp70 family ATPase, constituent of the import motor component of the Translocase of the Inner Mitochondrial membrane (TIM23 complex) involved in protein translocation and folding subunit of SceI endonuclease
	YJL033W	6.99224	0.541858	0.000752564	0.00855189	0.414771	YJL033W	2513	HCA4	Putative nucleolar DEAD box RNA helicase high-copy number suppression of a U14 snoRNA processing mutant suggests an involvement in 18S rRNA synthesis
	YJL137C	4.25158	0.540778	0.00264092	0.0202461	0.782958	YJL137C	1343	GLG2	Self-glucosylating initiator of glycogen synthesis, also glucosylates n-dodecyl-beta-D-maltoside similar to mammalian glycogenin
	YLR212C	6.26205	0.539156	0.000376279	0.00542505	0.661579	YLR212C	1622	TUB4	Gamma-tubulin, involved in nucleating microtubules from both the cytoplasmic and nuclear faces of the spindle pole body
	YGL206C	6.06142	0.537658	0.000484973	0.00632392	0.630537	YGL206C	5162	CHC1	Clathrin heavy chain, subunit of the major coat protein involved in intracellular protein transport and endocytosis two heavy chains form the clathrin triskelion structural component the light chain (CLC1) is thought to regulate function
	YDL147W	6.48696	0.536856	0.000257322	0.00412313	0.723127	YDL147W	1538	RPN5	Subunit of the COP9 signalosome (CSN) and non-ATPase regulatory subunit of the 26S proteasome lid, similar to mammalian p55 subunit and to another S. cerevisiae regulatory subunit, Rpn7p Rpn5p is an essential protein
	YPL012W	6.369	0.535485	0.00197443	0.0167111	0.294356	YPL012W	3887	RRP12	Protein required for export of the ribosomal subunits associates with the RNA components of the pre-ribosomes has a role in nuclear import in association with Pse1p contains HEAT-repeats
	YJR126C	6.14692	0.535207	0.00451316	0.0295446	0.174198	YJR126C	2636	VPS70	Protein of unknown function involved in vacuolar protein sorting
	YBR142W	5.21438	0.534639	0.000449082	0.00604171	0.866751	YBR142W	2522	MAK5	Essential nucleolar protein, putative DEAD-box RNA helicase required for maintenance of M1 dsRNA virus involved in biogenesis of large (60S) ribosomal subunits
	YML085C	8.45502	0.53419	0.00262911	0.0202212	0.190364	YML085C	1660	TUB1	Alpha-tubulin associates with beta-tubulin (Tub2p) to form tubulin dimer, which polymerizes to form microtubules
	YDR232W	7.03262	0.532094	0.0024513	0.0191911	0.222938	YDR232W	1847	HEM1	5-aminolevulinate synthase, catalyzes the first step in the heme biosynthetic pathway an N-terminal signal sequence is required for localization to the mitochondrial matrix expression is regulated by Hap2p-Hap3p
	YGL173C	8.29877	0.531954	0.000131774	0.00256134	0.790672	YGL173C	4787	KEM1	Evolutionarily-conserved 5'-3' exonuclease component of cytoplasmic processing (P) bodies involved in mRNA decay plays a role in microtubule-mediated processes, filamentous growth, ribosomal RNA maturation, and telomere maintenance
	YLR383W	4.55063	0.529921	0.00428828	0.0284099	0.551514	YLR383W	3545	SMC6	Protein involved in structural maintenance of chromosomes essential subunit of Mms21-Smc5-Smc6 complex required for growth, DNA repair, interchromosomal and sister chromatid recombination homologous to S. pombe rad18
	YJL071W	4.94367	0.529327	0.000666264	0.00791476	0.88037	YJL071W	1925	ARG2	Acetylglutamate synthase (glutamate N-acetyltransferase), mitochondrial enzyme that catalyzes the first step in the biosynthesis of the arginine precursor ornithine forms a complex with Arg5,6p
	YHR026W	7.30421	0.528617	6.23993e-05	0.00152864	0.935675	YHR026W	842	VMA16	Subunit c'' of the vacuolar ATPase, which functions in acidification of the vacuole one of three proteolipid subunits of the V0 domain
	YBR218C	7.6713	0.528364	0.000181593	0.00320814	0.748493	YBR218C	3743	PYC2	Pyruvate carboxylase isoform, cytoplasmic enzyme that converts pyruvate to oxaloacetate highly similar to isoform Pyc1p but differentially regulated mutations in the human homolog are associated with lactic acidosis
	YNL220W	6.87714	0.527791	0.000222233	0.00366751	0.752556	YNL220W	1502	ADE12	Adenylosuccinate synthase, catalyzes the first step in synthesis of adenosine monophosphate from inosine 5'monophosphate during purine nucleotide biosynthesis exhibits binding to single-stranded autonomously replicating (ARS) core sequence
	YGR218W	6.7825	0.526728	0.000146851	0.0027346	0.84256	YGR218W	3455	CRM1	Major karyopherin, involved in export of proteins, RNAs, and ribosomal subunits from the nucleus exportin
	YDL126C	9.50497	0.52605	0.000448354	0.00604171	0.578741	YDL126C	2708	CDC48	ATPase involved in ubiquitin-mediated protein degradation Cdc48p-Npl4p-Ufd1p complex participates in ER-associated degradation (ERAD) while Cdc48p-Npl4p-Vms1p complex participates in mitochondria-associated degradation (MAD) along with Npl4-Ufd1 complex, important for maintaining the cell wall integrity during heat stress to allow G1 progression
	YGR024C	4.22281	0.524791	0.00367521	0.0255791	0.777875	YGR024C	914	THG1	tRNAHis guanylyltransferase, adds a guanosine residue to the 5' end of tRNAHis after transcription and RNase P cleavage couples nuclear division and migration to cell budding and cytokinesis essential enzyme conserved among eukaryotes
	YJR088C	10.0256	0.522688	0.00411206	0.0275995	0.176981	YJR088C	1079	EMC2	Member of a transmembrane complex required for efficient folding of proteins in the ER null mutant displays induction of the unfolded protein response
	YLR446W	4.06904	0.520959	0.00790299	0.0440904	0.63905	YLR446W	1502	YLR446W	Putative protein of unknown function with similarity to hexokinases transcript is upregulated during sporulation and the unfolded protein response YLR446W is not an essential gene
	YCL014W	5.25945	0.520282	0.00124617	0.0121564	0.686018	YCL014W	5111	BUD3	Protein involved in bud-site selection and required for axial budding pattern localizes with septins to bud neck in mitosis and may constitute an axial landmark for next round of budding
	YDR060W	7.94833	0.51885	0.00307815	0.0228048	0.198206	YDR060W	3278	MAK21	Constituent of 66S pre-ribosomal particles, required for large (60S) ribosomal subunit biogenesis involved in nuclear export of pre-ribosomes required for maintenance of dsRNA virus homolog of human CAATT-binding protein
	YMR218C	4.37132	0.515479	0.00916464	0.0491471	0.456866	YMR218C	3509	TRS130	One of 10 subunits of the transport protein particle (TRAPP) complex of the cis-Golgi which mediates vesicle docking and fusion involved in ER to Golgi membrane traffic mutation activates transcription of OCH1
	YDR341C	9.21836	0.514719	0.00018721	0.00326551	0.805796	YDR341C	2024	YDR341C	Arginyl-tRNA synthetase, proposed to be cytoplasmic but the authentic, non-tagged protein is detected in highly purified mitochondria in high-throughput studies
	YPL160W	8.64625	0.513353	0.00015437	0.00284577	0.830304	YPL160W	3473	CDC60	Cytosolic leucyl tRNA synthetase, ligates leucine to the appropriate tRNA
	YKL191W	5.84282	0.511391	0.00299609	0.022347	0.350001	YKL191W	1805	DPH2	Protein required, along with Dph1p, Kti11p, Jjj3p, and Dph5p, for synthesis of diphthamide, which is a modified histidine residue of translation elongation factor 2 (Eft1p or Eft2p) may act in a complex with Dph1p and Kti11p
	YBR038W	5.84799	0.509533	0.00632011	0.0377507	0.261007	YBR038W	3092	CHS2	Chitin synthase II catalyzes transfer of N-acetylglucosamine (GlcNAc) to chitin upon activation of zymogenic form required for chitin synthesis in the primary septum during cytokinesis localization regulated by Cdk1p during mitosis
	YNL170W	3.85426	0.509209	0.00462818	0.0300124	0.913176	YNL170W	596	YNL170W	Dubious open reading frame unlikely to encode a functional protein, based on available experimental and comparative sequence data
	YEL025C	4.54723	0.509018	0.00135187	0.0127831	0.927052	YEL025C	3767	YEL025C	Putative protein of unknown function green fluorescent protein (GFP)-fusion protein localizes to both the cytoplasm and the nucleus
	YMR116C	10.8944	0.507136	0.00021594	0.00363995	0.884328	YMR116C	1433	ASC1	G-protein beta subunit and guanine nucleotide dissociation inhibitor for Gpa2p ortholog of RACK1 that inhibits translation core component of the small (40S) ribosomal subunit represses Gcn4p in the absence of amino acid starvation
	YDL148C	6.33682	0.505525	0.000306683	0.00467915	0.821266	YDL148C	2633	NOP14	Nucleolar protein, forms a complex with Noc4p that mediates maturation and nuclear export of 40S ribosomal subunits also present in the small subunit processome complex, which is required for processing of pre-18S rRNA
	YGR003W	4.34437	0.505319	0.00160153	0.0146152	0.960601	YGR003W	2435	CUL3	Ubiquitin-protein ligase, forms a complex with Elc1p that polyubiquitylates monoubiquitylated RNA polymerase II to trigger its proteolysis cullin family member with similarity to Cdc53p and human CUL3
	YDR217C	7.18948	0.5027	0.000943835	0.00994726	0.500452	YDR217C	4130	RAD9	DNA damage-dependent checkpoint protein, required for cell-cycle arrest in G1/S, intra-S, and G2/M transmits checkpoint signal by activating Rad53p and Chk1p hyperphosphorylated by Mec1p and Tel1p potential Cdc28p substrate
	YIL078W	7.73202	0.501204	0.000855348	0.00930119	0.504474	YIL078W	2405	THS1	Threonyl-tRNA synthetase, essential cytoplasmic protein
	YDR346C	6.37626	0.501173	0.00317898	0.023178	0.294662	YDR346C	1646	SVF1	Protein with a potential role in cell survival pathways, required for the diauxic growth shift expression in mammalian cells increases survival under conditions inducing apoptosis mutant has increased aneuploidy tolerance
	YPR035W	8.57424	0.501164	0.00202486	0.0170398	0.315079	YPR035W	1313	GLN1	Glutamine synthetase (GS), synthesizes glutamine from glutamate and ammonia with Glt1p, forms the secondary pathway for glutamate biosynthesis from ammonia expression regulated by nitrogen source and by amino acid limitation
	YBL022C	6.56701	0.500989	0.00164836	0.0148218	0.415021	YBL022C	3602	PIM1	ATP-dependent Lon protease, involved in degradation of misfolded proteins in mitochondria required for biogenesis and maintenance of mitochondria
	YLR355C	9.79947	0.499152	0.000372431	0.00540899	0.751081	YLR355C	1388	ILV5	Bifunctional acetohydroxyacid reductoisomerase and mtDNA binding protein involved in branched-chain amino acid biosynthesis and maintenance of wild-type mitochondrial DNA found in mitochondrial nucleoids
	YLR310C	5.4762	0.496094	0.00274247	0.020793	0.506669	YLR310C	4970	CDC25	Membrane bound guanine nucleotide exchange factor (GEF or GDP-release factor) indirectly regulates adenylate cyclase through activation of Ras1p and Ras2p by stimulating the exchange of GDP for GTP required for progression through G1
	YPL043W	7.5505	0.495361	0.0013719	0.0129043	0.425495	YPL043W	2258	NOP4	Nucleolar protein, essential for processing and maturation of 27S pre-rRNA and large ribosomal subunit biogenesis constituent of 66S pre-ribosomal particles contains four RNA recognition motifs (RRMs)
	YBR199W	5.7701	0.495101	0.000791457	0.0088489	0.74581	YBR199W	1595	KTR4	Putative mannosyltransferase involved in protein glycosylation member of the KRE2/MNT1 mannosyltransferase family
	YDR496C	6.81965	0.49404	0.00233208	0.0187382	0.351265	YDR496C	2171	PUF6	Pumilio-homology domain protein that binds the 3' UTR of ASH1 mRNA and represses its translation, resulting in proper asymmetric localization of ASH1 mRNA also co-sediments with the 60S ribosomal subunit and is required for its biogenesis
	YEL027W	9.6257	0.494022	0.00161309	0.0146965	0.416077	YEL027W	683	VMA3	Proteolipid subunit of the vacuolar H(+)-ATPase V0 sector (subunit c dicyclohexylcarbodiimide binding subunit) required for vacuolar acidification and important for copper and iron metal ion homeostasis
	YPL184C	6.23809	0.493469	0.000315098	0.00475634	0.875099	YPL184C	2039	MRN1	RNA-binding protein proposed to be involved in translational regulation binds specific categories of mRNAs, including those that contain upstream open reading frames (uORFs) and internal ribosome entry sites (IRES)
	YNL248C	5.97774	0.493031	0.0083914	0.0460233	0.178606	YNL248C	1448	RPA49	RNA polymerase I subunit A49
	YPR190C	4.92322	0.492855	0.00524715	0.033013	0.499789	YPR190C	2165	RPC82	RNA polymerase III subunit C82
	YDR268W	5.07331	0.492673	0.00225285	0.0182077	0.684172	YDR268W	1340	MSW1	Mitochondrial tryptophanyl-tRNA synthetase
	YBL039C/YBL039C-A	6.99756	0.492015	0.00193452	0.0164554	0.385731	YBL039C/YBL039C-A	1940	URA7/YBL039C-A	Major CTP synthase isozyme (see also URA8), catalyzes the ATP-dependent transfer of the amide nitrogen from glutamine to UTP, forming CTP, the final step in de novo biosynthesis of pyrimidines involved in phospholipid biosynthesis/Dubious open reading frame unlikely to encode a protein, based on available experimental and comparative sequence data completely overlaps the verified ORF URA7 identif…
	YJR064W	6.58785	0.490736	0.00206053	0.0171307	0.40648	YJR064W	1889	CCT5	Subunit of the cytosolic chaperonin Cct ring complex, related to Tcp1p, required for the assembly of actin and tubulins in vivo
	YOR027W	8.3655	0.487282	0.00835525	0.0458707	0.122223	YOR027W	1970	STI1	Hsp90 cochaperone, interacts with the Ssa group of the cytosolic Hsp70 chaperones and activates Ssa1p ATPase activity interacts with Hsp90 chaperones and inhibits their ATPase activity homolog of mammalian Hop
	YGR140W	4.39719	0.487185	0.00679841	0.039809	0.644097	YGR140W	3071	CBF2	Essential kinetochore protein, component of the CBF3 multisubunit complex that binds to the CDEIII region of the centromere Cbf2p also binds to the CDEII region possibly forming a different multimeric complex, ubiquitinated in vivo
	YOR048C	5.47064	0.48708	0.000871161	0.00941538	0.830799	YOR048C	3221	RAT1	Nuclear 5' to 3' single-stranded RNA exonuclease, involved in RNA metabolism, including rRNA and snRNA processing as well as poly (A+) dependent and independent mRNA transcription termination
	YKL014C	5.49668	0.486953	0.00396024	0.026916	0.430049	YKL014C	5495	URB1	Nucleolar protein required for the normal accumulation of 25S and 5.8S rRNAs, associated with the 27SA2 pre-ribosomal particle proposed to be involved in the biogenesis of the 60S ribosomal subunit
	YDR034C-D/YDR034C-C	5.13656	0.48641	0.00237188	0.0189376	0.682325	YDR034C-D/YDR034C-C	5514	YDR034C-D/YDR034C-C	Retrotransposon TYA Gag and TYB Pol genes transcribed/translated as one unit polyprotein is processed to make a nucleocapsid-like protein (Gag), reverse transcriptase (RT), protease (PR), and integrase (IN) similar to retroviral genes/Retrotransposon TYA Gag gene co-transcribed with TYB Pol translated as TYA or TYA-TYB polyprotein Gag is a nucleocapsid protein that is the structural constituent o…
	YEL031W	7.36217	0.486114	0.00109952	0.0111819	0.519777	YEL031W	3848	SPF1	P-type ATPase, ion transporter of the ER membrane involved in ER function and Ca2+ homeostasis required for regulating Hmg2p degradation confers sensitivity to a killer toxin (SMKT) produced by Pichia farinosa KK1
	YLR019W	4.4574	0.484502	0.00296985	0.022239	0.883277	YLR019W	1394	PSR2	Functionally redundant Psr1p homolog, a plasma membrane phosphatase involved in the general stress response required with Psr1p and Whi2p for full activation of STRE-mediated gene expression, possibly through dephosphorylation of Msn2p
	YAR042W	7.68918	0.484234	0.00471383	0.0304665	0.20985	YAR042W	3767	SWH1	Protein similar to mammalian oxysterol-binding protein contains ankyrin repeats localizes to the Golgi and the nucleus-vacuole junction
	YDR449C	5.04499	0.483995	0.0087215	0.047456	0.355083	YDR449C	1523	UTP6	Nucleolar protein, component of the small subunit (SSU) processome containing the U3 snoRNA that is involved in processing of pre-18S rRNA
	YDR515W	4.47079	0.481991	0.00315161	0.0230457	0.868899	YDR515W	1544	SLF1	RNA binding protein that associates with polysomes proposed to be involved in regulating mRNA translation involved in the copper-dependent mineralization of copper sulfide complexes on cell surface in cells cultured in copper salts
	YCL017C	6.15835	0.481723	0.00147207	0.0137294	0.580114	YCL017C	1694	NFS1	Cysteine desulfurase involved in iron-sulfur cluster (Fe/S) biogenesis and in thio-modification of mitochondrial and cytoplasmic tRNAs essential protein located predominantly in mitochondria
	YMR128W	5.95852	0.480812	0.000661871	0.00787956	0.812091	YMR128W	4004	ECM16	Essential DEAH-box ATP-dependent RNA helicase specific to the U3 snoRNP, predominantly nucleolar in distribution, required for 18S rRNA synthesis
	YPR097W	6.08353	0.477896	0.00102619	0.0106542	0.696411	YPR097W	3422	YPR097W	Protein that contains a Phox homology (PX) domain and binds phosphoinositides the authentic, non-tagged protein is detected in highly purified mitochondria in high-throughput studies
	YOR335C	6.51109	0.475623	0.00344659	0.0244815	0.351102	YOR335C	3077	ALA1	Cytoplasmic and mitochondrial alanyl-tRNA synthetase, required for protein synthesis point mutation (cdc64-1 allele) causes cell cycle arrest at G1 lethality of null mutation is functionally complemented by human homolog
	YCR053W	8.77552	0.47562	0.000859592	0.00932692	0.611706	YCR053W	1745	THR4	Threonine synthase, conserved protein that catalyzes formation of threonine from O-phosphohomoserine expression is regulated by the GCN4-mediated general amino acid control pathway
	YBR084W	7.5675	0.473938	0.00689813	0.0400857	0.177467	YBR084W	3128	MIS1	Mitochondrial C1-tetrahydrofolate synthase, involved in interconversion between different oxidation states of tetrahydrofolate (THF) provides activities of formyl-THF synthetase, methenyl-THF cyclohydrolase, and methylene-THF dehydrogenase
	YLR240W	4.29529	0.471495	0.00298068	0.0222622	0.961821	YLR240W	2828	VPS34	Phosphatidylinositol 3-kinase responsible for the synthesis of phosphatidylinositol 3-phosphate forms membrane-associated signal transduction complex with Vps15p to regulate protein sorting activated by the GTP-bound form of Gpa1p
	YKL211C	5.63964	0.470348	0.00177729	0.0156492	0.688089	YKL211C	1655	TRP3	Bifunctional enzyme exhibiting both indole-3-glycerol-phosphate synthase and anthranilate synthase activities, forms multifunctional hetero-oligomeric anthranilate synthase:indole-3-glycerol phosphate synthase enzyme complex with Trp2p
	YPR010C	9.0188	0.470216	0.000595833	0.00728211	0.733011	YPR010C	3812	RPA135	RNA polymerase I second largest subunit A135
	YMR290C	6.98005	0.46774	0.00180766	0.0158121	0.496978	YMR290C	1718	HAS1	ATP-dependent RNA helicase localizes to both the nuclear periphery and nucleolus highly enriched in nuclear pore complex fractions constituent of 66S pre-ribosomal particles
	YOL064C	4.92184	0.467533	0.00719193	0.041165	0.506167	YOL064C	1274	MET22	Bisphosphate-3'-nucleotidase, involved in salt tolerance and methionine biogenesis dephosphorylates 3'-phosphoadenosine-5'-phosphate and 3'-phosphoadenosine-5'-phosphosulfate, intermediates of the sulfate assimilation pathway
	YJR009C	11.6769	0.465884	0.00399631	0.027061	0.412454	YJR009C	1199	TDH2	Glyceraldehyde-3-phosphate dehydrogenase, isozyme 2, involved in glycolysis and gluconeogenesis tetramer that catalyzes the reaction of glyceraldehyde-3-phosphate to 1,3 bis-phosphoglycerate detected in the cytoplasm and cell wall
	YLR015W	4.99904	0.465295	0.00201514	0.0169839	0.85715	YLR015W	1718	BRE2	Subunit of COMPASS (Set1C) complex, which methylates Lys4 of histone H3 and functions in silencing at telomeres has a C-terminal Sdc1 Dpy-30 Interaction (SDI) domain that mediates binding to Sdc1p similar to trithorax-group protein ASH2L
	YDR120C	6.94235	0.463706	0.00406638	0.0273674	0.321975	YDR120C	1913	TRM1	tRNA methyltransferase two forms of the protein are made by alternative translation starts localizes to both the nucleus and mitochondrion to produce the modified base N2,N2-dimethylguanosine in tRNAs in both compartments
	YHR149C	5.12313	0.461142	0.00809085	0.044731	0.450408	YHR149C	2405	SKG6	Integral membrane protein that localizes primarily to growing sites such as the bud tip or the cell periphery potential Cdc28p substrate Skg6p interacts with Zds1p and Zds2p
	YDR291W	3.84905	0.460988	0.00653992	0.0387613	0.972594	YDR291W	3434	HRQ1	Putative RecQ helicase belongs to the widely conserved RecQ family of proteins which are involved in maintaining genomic integrity similar to the human RecQ4p implicated in Rothmund-Thomson syndrome(RTS)
	YPR031W	5.30873	0.460977	0.00834768	0.0458707	0.364713	YPR031W	2447	NTO1	Subunit of the NuA3 histone acetyltransferase complex that acetylates histone H3 contains PHD finger domain that interacts with methylated histone H3
	YBR024W	6.45982	0.460933	0.00134148	0.0127487	0.647915	YBR024W	1106	SCO2	Protein anchored to the mitochondrial inner membrane, similar to Sco1p and may have a redundant function with Sco1p in delivery of copper to cytochrome c oxidase interacts with Cox2p
	YPL195W	7.22148	0.460709	0.000198621	0.00344276	0.962839	YPL195W	2999	APL5	Delta adaptin-like subunit of the clathrin associated protein complex (AP-3) functions in transport of alkaline phosphatase to the vacuole via the alternate pathway, suppressor of loss of casein kinase 1 function
	YDL014W	8.90104	0.46051	0.00384236	0.0263422	0.316657	YDL014W	1184	NOP1	Nucleolar protein, component of the small subunit processome complex, which is required for processing of pre-18S rRNA has similarity to mammalian fibrillarin
	YLR197W	7.67564	0.460143	0.000531463	0.00675497	0.800538	YLR197W	1715	NOP56	Essential evolutionarily-conserved nucleolar protein component of the box C/D snoRNP complexes that direct 2'-O-methylation of pre-rRNA during its maturation overexpression causes spindle orientation defects
	YDL121C	6.00197	0.457095	0.000919183	0.00978096	0.827785	YDL121C	650	YDL121C	Putative protein of unknown function green fluorescent protein (GFP)-fusion protein localizes to the endoplasmic reticulum YDL121C is not an essential protein
	YHR031C	5.93059	0.456726	0.00121964	0.0120047	0.791689	YHR031C	2372	RRM3	DNA helicase involved in rDNA replication and Ty1 transposition relieves replication fork pauses at telomeric regions structurally and functionally related to Pif1p
	YKL015W	5.25666	0.455844	0.00193785	0.0164583	0.830135	YKL015W	3140	PUT3	Transcriptional activator of proline utilization genes, constitutively binds PUT1 and PUT2 promoter sequences and undergoes a conformational change to form the active state has a Zn(2)-Cys(6) binuclear cluster domain
	YFR002W	5.6666	0.4556	0.0045856	0.0298204	0.488317	YFR002W	2720	NIC96	Component of the nuclear pore complex, required for nuclear pore formation forms a subcomplex with Nsp1p, Nup57p, and Nup49p
	YOR125C	4.4693	0.452157	0.00576128	0.0354027	0.832324	YOR125C	902	CAT5	Protein required for ubiquinone (Coenzyme Q) biosynthesis localizes to the matrix face of the mitochondrial inner membrane in a large complex with ubiquinone biosynthetic enzymes required for gluconeogenic gene activation
	YKR086W	5.45571	0.45175	0.00162243	0.0147087	0.832925	YKR086W	3416	PRP16	DEAH-box RNA helicase involved in second catalytic step of splicing exhibits ATP-dependent RNA unwinding activity mediates the release of Yju2p and Cwc25p in the second step in the absence of ATP, stabilizes the binding of Cwc25p to the spliceosome in the first catalytic step
	YOR195W	4.72477	0.449954	0.00663167	0.0392208	0.692766	YOR195W	2666	SLK19	Kinetochore-associated protein required for normal segregation of chromosomes in meiosis and mitosis component of the FEAR regulatory network, which promotes Cdc14p release from the nucleolus during anaphase potential Cdc28p substrate
	YHR032W-A	5.46039	0.449901	0.00140862	0.0131822	0.874894	YHR032W-A	380	YHR032W-A	Dubious open reading frame unlikely to encode a protein, based on available experimental and comparative sequence data partially overlaps the dubious ORF YHR032C-A
	YNR008W	5.27372	0.449771	0.00413375	0.0276856	0.64254	YNR008W	2186	LRO1	Acyltransferase that catalyzes diacylglycerol esterification one of several acyltransferases that contribute to triglyceride synthesis putative homolog of human lecithin cholesterol acyltransferase
	YBR247C	5.40835	0.449426	0.00480581	0.0308737	0.562364	YBR247C	1652	ENP1	Protein associated with U3 and U14 snoRNAs, required for pre-rRNA processing and 40S ribosomal subunit synthesis localized in the nucleus and concentrated in the nucleolus
	YDL145C	7.81949	0.448974	0.000883701	0.0095136	0.730978	YDL145C	3806	COP1	Alpha subunit of COPI vesicle coatomer complex, which surrounds transport vesicles in the early secretory pathway
	YNL321W	5.97418	0.447769	0.000416891	0.00575438	0.973727	YNL321W	2927	VNX1	Calcium/H+ antiporter localized to the endoplasmic reticulum membrane member of the calcium exchanger (CAX) family potential Cdc28p substrate
	YKL120W	6.41068	0.447538	0.00337588	0.0241975	0.470381	YKL120W	1175	OAC1	Mitochondrial inner membrane transporter, transports oxaloacetate, sulfate, thiosulfate, and isopropylmalate member of the mitochondrial carrier family
	YDR037W	9.88765	0.447174	0.00110549	0.0112177	0.730001	YDR037W	1976	KRS1	Lysyl-tRNA synthetase
	YEL042W	7.01249	0.446258	0.000353925	0.00518839	0.942464	YEL042W	1757	GDA1	Guanosine diphosphatase located in the Golgi, involved in the transport of GDP-mannose into the Golgi lumen by converting GDP to GMP after mannose is transferred its substrate
	YGR240C	7.41627	0.446199	0.000464681	0.0061737	0.888592	YGR240C	3164	PFK1	Alpha subunit of heterooctameric phosphofructokinase involved in glycolysis, indispensable for anaerobic growth, activated by fructose-2,6-bisphosphate and AMP, mutation inhibits glucose induction of cell cycle-related genes
	YLL034C	5.90351	0.443237	0.00183751	0.0159793	0.740517	YLL034C	2714	RIX7	Putative ATPase of the AAA family, required for export of pre-ribosomal large subunits from the nucleus distributed between the nucleolus, nucleoplasm, and nuclear periphery depending on growth conditions
	YPR148C	6.41518	0.442862	0.00672498	0.0395182	0.314432	YPR148C	1508	YPR148C	Protein of unknown function that may interact with ribosomes, based on co-purification experiments green fluorescent protein (GFP)-fusion protein localizes to the cytoplasm in a punctate pattern
	YMR243C	6.20866	0.442408	0.00578699	0.035521	0.382775	YMR243C	1529	ZRC1	Vacuolar membrane zinc transporter, transports zinc from the cytosol into the vacuole for storage also has a role in resistance to zinc shock resulting from a sudden influx of zinc into the cytoplasm
	YGR145W	6.57268	0.440243	0.00267063	0.0203885	0.55247	YGR145W	2324	ENP2	Essential nucleolar protein, required for biogenesis of the small ribosomal subunit contains WD repeats, interacts with Mpp10p and Bfr2p, and has homology to Spb1p
	YDR101C	4.94983	0.438473	0.00705875	0.0405713	0.639455	YDR101C	1982	ARX1	Shuttling pre-60S factor involved in the biogenesis of ribosomal large subunit biogenesis interacts directly with Alb1 responsible for Tif6 recycling defects in absence of Rei1 associated with the ribosomal export complex
	YJL044C	5.39904	0.438356	0.00280381	0.0211707	0.771407	YJL044C	1577	GYP6	GTPase-activating protein (GAP) for the yeast Rab family member, Ypt6p involved in vesicle mediated protein transport
	YPR137W	4.90236	0.438122	0.00764959	0.0432457	0.623974	YPR137W	1922	RRP9	Protein involved in pre-rRNA processing, associated with U3 snRNP component of small ribosomal subunit (SSU) processosome ortholog of the human U3-55k protein
	YKL210W	6.02584	0.437794	0.00332806	0.0239481	0.586586	YKL210W	3275	UBA1	Ubiquitin activating enzyme (E1), involved in ubiquitin-mediated protein degradation and essential for viability
	YDL031W	7.30248	0.437173	0.00356651	0.0251068	0.435955	YDL031W	3188	DBP10	Putative ATP-dependent RNA helicase of the DEAD-box protein family, constituent of 66S pre-ribosomal particles essential protein involved in ribosome biogenesis
	YIL053W	9.66251	0.433549	0.00304999	0.0226266	0.51285	YIL053W	953	RHR2	Constitutively expressed isoform of DL-glycerol-3-phosphatase involved in glycerol biosynthesis, induced in response to both anaerobic and, along with the Hor2p/Gpp2p isoform, osmotic stress
	YLR276C	5.9912	0.432683	0.00161813	0.0147087	0.808436	YLR276C	1985	DBP9	ATP-dependent RNA helicase of the DEAD-box family involved in biogenesis of the 60S ribosomal subunit
	YKL004W	6.54664	0.431857	0.0019235	0.0163973	0.69321	YKL004W	1406	AUR1	Phosphatidylinositol:ceramide phosphoinositol transferase (IPC synthase), required for sphingolipid synthesis can mutate to confer aureobasidin A resistance
	YPL249C	5.62527	0.431729	0.0044571	0.0292471	0.608031	YPL249C	2885	GYP5	GTPase-activating protein (GAP) for yeast Rab family members involved in ER to Golgi trafficking exhibits GAP activity toward Ypt1p that is stimulated by Gyl1p, also acts on Sec4p interacts with Gyl1p, Rvs161p and Rvs167p involved in recruiting Rvs167p to the bud tip during polarized growth
	YBL076C	8.66594	0.430906	0.00204003	0.0171104	0.598364	YBL076C	3419	ILS1	Cytoplasmic isoleucine-tRNA synthetase, target of the G1-specific inhibitor reveromycin A
	YKR010C	4.7593	0.43044	0.00548394	0.0340399	0.832524	YKR010C	2516	TOF2	Protein required for rDNA silencing and mitotic rDNA condensation stimulates Cdc14p phosphatase activity and biphasic release to promote rDNA repeat segregation required for condensin recruitment to the replication fork barrier site
	YIL103W	4.93222	0.430055	0.00568951	0.0350398	0.755266	YIL103W	1478	DPH1	Protein required, along with Dph2p, Kti11p, Jjj3p, and Dph5p, for synthesis of diphthamide, which is a modified histidine residue of translation elongation factor 2 (Eft1p or Eft2p) may act in a complex with Dph2p and Kti11p
	YOR217W	5.79396	0.429361	0.000674255	0.00794122	0.977328	YOR217W	2786	RFC1	Subunit of heteropentameric Replication factor C (RF-C), which is a DNA binding protein and ATPase that acts as a clamp loader of the proliferating cell nuclear antigen (PCNA) processivity factor for DNA polymerases delta and epsilon
	YNL130C	7.00265	0.429186	0.000908392	0.00968483	0.841979	YNL130C	1474	CPT1	Cholinephosphotransferase, required for phosphatidylcholine biosynthesis and for inositol-dependent regulation of EPT1 transcription
	YCR077C	5.11572	0.42893	0.00916605	0.0491471	0.546672	YCR077C	2591	PAT1	Topoisomerase II-associated deadenylation-dependent mRNA-decapping factor also required for faithful chromosome transmission, maintenance of rDNA locus stability, and protection of mRNA 3'-UTRs from trimming functionally linked to Pab1p
	YPR041W	7.75249	0.428668	0.00445034	0.0292471	0.403239	YPR041W	1418	TIF5	Translation initiation factor eIF5 functions both as a GTPase-activating protein to mediate hydrolysis of ribosome-bound GTP and as a GDP dissociation inhibitor to prevent recycling of eIF2
	YJL034W	8.18266	0.428463	0.00190664	0.0163443	0.625478	YJL034W	2249	KAR2	ATPase involved in protein import into the ER, also acts as a chaperone to mediate protein folding in the ER and may play a role in ER export of soluble proteins regulates the unfolded protein response via interaction with Ire1p
	YGR266W	5.73545	0.428262	0.00765898	0.0432544	0.430592	YGR266W	2306	YGR266W	Protein of unknown function, predicted to contain a single transmembrane domain mutant has increased aneuploidy tolerance localized to both the mitochondrial outer membrane and the plasma membrane
	YGR264C	6.78497	0.427579	0.00107415	0.0110227	0.831038	YGR264C	2456	MES1	Methionyl-tRNA synthetase, forms a complex with glutamyl-tRNA synthetase (Gus1p) and Arc1p, which increases the catalytic efficiency of both tRNA synthetases also has a role in nuclear export of tRNAs
	YDR238C	6.96936	0.425497	0.000381678	0.00547867	0.977505	YDR238C	3122	SEC26	Essential beta-coat protein of the COPI coatomer, involved in ER-to-Golgi protein trafficking and maintenance of normal ER morphology shares 43% sequence identity with mammalian beta-coat protein (beta-COP)
	YHL030W	6.45041	0.424375	0.00188279	0.0161902	0.747511	YHL030W	5807	ECM29	Scaffold protein that assists in association of the proteasome core particle with the regulatory particle degraded by the mature proteasome after assembly contains HEAT-like repeats
	YHR108W	7.63546	0.424222	0.00139218	0.0130728	0.739779	YHR108W	1958	GGA2	Protein that interacts with and regulates Arf1p and Arf2p in a GTP-dependent manner to facilitate traffic through the late Golgi binds phosphatidylinositol 4-phosphate, which plays a role in TGN localization has homology to gamma-adaptin
	YMR083W	8.61403	0.423465	0.00127587	0.0123163	0.757579	YMR083W	1328	ADH3	Mitochondrial alcohol dehydrogenase isozyme III involved in the shuttling of mitochondrial NADH to the cytosol under anaerobic conditions and ethanol production
	YDR297W	6.34618	0.423246	0.00135187	0.0127831	0.845199	YDR297W	1250	SUR2	Sphinganine C4-hydroxylase, catalyses the conversion of sphinganine to phytosphingosine in sphingolipid biosyntheis
	YOR171C	4.72684	0.422748	0.00496795	0.0316205	0.891342	YOR171C	2075	LCB4	Sphingoid long-chain base kinase, responsible for synthesis of long-chain base phosphates, which function as signaling molecules, regulates synthesis of ceramide from exogenous long-chain bases, localizes to the Golgi and late endosomes
	YGL238W	8.17941	0.421206	0.00203355	0.0170868	0.645008	YGL238W	3083	CSE1	Nuclear envelope protein that mediates the nuclear export of importin alpha (Srp1p), homolog of metazoan CAS protein, required for accurate chromosome segregation
	YOR142W	6.59482	0.420696	0.00420981	0.0279572	0.513076	YOR142W	1190	LSC1	Alpha subunit of succinyl-CoA ligase, which is a mitochondrial enzyme of the TCA cycle that catalyzes the nucleotide-dependent conversion of succinyl-CoA to succinate phosphorylated
	YNL193W	5.17768	0.419026	0.00599295	0.0364284	0.703395	YNL193W	1877	YNL193W	Putative protein of unknown function exhibits a two-hybrid interaction with Yhr151cp in a large-scale analysis
	YLR450W	6.99174	0.415997	0.00371833	0.0256692	0.541015	YLR450W	3338	HMG2	One of two isozymes of HMG-CoA reductase that convert HMG-CoA to mevalonate, a rate-limiting step in sterol biosynthesis overproduction induces assembly of peripheral ER membrane arrays and short nuclear-associated membrane stacks
	YDL046W	8.88543	0.414585	0.00440266	0.0290628	0.466527	YDL046W	722	NPC2	Functional homolog of human NPC2/He1, which is a cholesterol-binding protein whose deficiency causes Niemann-Pick type C2 disease involving retention of cholesterol in lysosomes
	YBR127C	9.41324	0.414148	0.00377147	0.025953	0.533464	YBR127C	1754	VMA2	Subunit B of the eight-subunit V1 peripheral membrane domain of the vacuolar H+-ATPase (V-ATPase), an electrogenic proton pump found throughout the endomembrane system contains nucleotide binding sites also detected in the cytoplasm
	YBR086C	7.80751	0.413341	0.000804285	0.00893897	0.904186	YBR086C	3041	IST2	Plasma membrane protein that may be involved in osmotolerance, localizes to the mother cell in small-budded cells and to the bud in medium- and large-budded cells mRNA is transported to the bud tip by an actomyosin-driven process
	YLR153C	7.80681	0.411454	0.000779407	0.00875149	0.914948	YLR153C	2252	ACS2	Acetyl-coA synthetase isoform which, along with Acs1p, is the nuclear source of acetyl-coA for histone acetylation mutants affect global transcription required for growth on glucose expressed under anaerobic conditions
	YBR233W	5.5108	0.409368	0.00458776	0.0298204	0.755519	YBR233W	1442	PBP2	RNA binding protein with similarity to mammalian heterogeneous nuclear RNP K protein, involved in the regulation of telomere position effect and telomere length
	YKL077W	6.23945	0.40908	0.00188249	0.0161902	0.842209	YKL077W	1379	YKL077W	Putative protein of unknown function green fluorescent protein (GFP)-fusion protein localizes to the vacuole
	YIL075C	9.5803	0.40834	0.00221956	0.0179958	0.723011	YIL075C	3038	RPN2	Subunit of the 26S proteasome, substrate of the N-acetyltransferase Nat1p
	YJL200C	6.76751	0.405192	0.0090181	0.0486378	0.35226	YJL200C	2570	ACO2	Putative mitochondrial aconitase isozyme similarity to Aco1p, an aconitase required for the TCA cycle expression induced during growth on glucose, by amino acid starvation via Gcn4p, and repressed on ethanol
	YPL105C	6.36007	0.403945	0.0045728	0.0297935	0.603689	YPL105C	2750	SYH1	Protein of unknown function that influences nuclear pore distribution co-purifies with ribosomes contains a GYF domain, which bind proline-rich sequences deletion extends chronological lifespan
	YGL245W	7.40311	0.402	0.00158168	0.0144581	0.823374	YGL245W	2327	GUS1	Glutamyl-tRNA synthetase (GluRS), forms a complex with methionyl-tRNA synthetase (Mes1p) and Arc1p complex formation increases the catalytic efficiency of both tRNA synthetases and ensures their correct localization to the cytoplasm
	YNL085W	6.74983	0.401518	0.0015061	0.01395	0.874512	YNL085W	2693	MKT1	Protein that forms a complex with Pbp1p that may mediate posttranscriptional regulation of HO involved in propagation of M2 dsRNA satellite of L-A virus allelic variation affects mitochondrial genome stability, drug resistance, and more
	YLL023C	6.29268	0.401223	0.00653729	0.0387613	0.516217	YLL023C	1040	POM33	Transmembrane nucleoporin involved in nuclear pore complex (NPC) distribution, assembly or stabilization highly conserved across species, orthologous to human TMEM33 and paralogous to Per33p
	YBL079W	8.79484	0.401097	0.00243524	0.0191484	0.70547	YBL079W	4709	NUP170	Subunit of the nuclear pore complex (NPC), required for NPC localization of specific nucleoporins involved in nuclear envelope permeability and chromosome segregation has similar to Nup157p essential role, with Nup157p, in NPC assembly
	YOR292C	5.37368	0.40099	0.00219432	0.0178779	0.958673	YOR292C	1130	YOR292C	Putative protein of unknown function green fluorescent protein (GFP)-fusion protein localizes to the vacuole YOR292C is not an essential gene
	YDR461C-A	6.60255	0.400393	0.00886595	0.0480522	0.408106	YDR461C-A	443	YDR461C-A	Putative protein of unknown function
	YJR117W	7.38873	0.394611	0.00639611	0.0381139	0.468653	YJR117W	1562	STE24	Highly conserved zinc metalloprotease that functions in two steps of a-factor maturation, C-terminal CAAX proteolysis and the first step of N-terminal proteolytic processing contains multiple transmembrane spans
	YIL147C	5.18927	0.390431	0.00617874	0.0371805	0.838766	YIL147C	3863	SLN1	Histidine kinase osmosensor that regulates a MAP kinase cascade transmembrane protein with an intracellular kinase domain that signals to Ypd1p and Ssk1p, thereby forming a phosphorelay system similar to bacterial two-component regulators
	YPR058W	6.08931	0.389655	0.00776041	0.0435594	0.550047	YPR058W	1124	YMC1	Mitochondrial protein, putative inner membrane transporter with a role in oleate metabolism and glutamate biosynthesis member of the mitochondrial carrier (MCF) family has similarity with Ymc2p
	YLR096W	5.37831	0.384603	0.00259436	0.0200281	0.975547	YLR096W	3644	KIN2	Serine/threonine protein kinase involved in regulation of exocytosis localizes to the cytoplasmic face of the plasma membrane closely related to Kin1p
	YER090W	8.42889	0.384403	0.000480564	0.00630682	0.997818	YER090W	1724	TRP2	Anthranilate synthase, catalyzes the initial step of tryptophan biosynthesis, forms multifunctional hetero-oligomeric anthranilate synthase:indole-3-glycerol phosphate synthase enzyme complex with Trp3p
	YPL134C	6.16953	0.384083	0.00255638	0.0198182	0.887227	YPL134C	1133	ODC1	Mitochondrial inner membrane transporter, exports 2-oxoadipate and 2-oxoglutarate from the mitochondrial matrix to the cytosol for lysine and glutamate biosynthesis and lysine catabolism suppresses, in multicopy, an fmc1 null mutation
	YLR342W-A	8.68318	0.38183	0.00875268	0.0475787	0.422451	YLR342W-A	374	YLR342W-A	Putative protein of unknown function
	YDR148C	5.9506	0.381715	0.00546255	0.0339837	0.730009	YDR148C	1592	KGD2	Dihydrolipoyl transsuccinylase, component of the mitochondrial alpha-ketoglutarate dehydrogenase complex, which catalyzes the oxidative decarboxylation of alpha-ketoglutarate to succinyl-CoA in the TCA cycle phosphorylated
	YOL077C	7.92809	0.381221	0.00453091	0.0296256	0.632053	YOL077C	1076	BRX1	Nucleolar protein, constituent of 66S pre-ribosomal particles depletion leads to defects in rRNA processing and a block in the assembly of large ribosomal subunits possesses a sigma(70)-like RNA-binding motif
	YLR248W	7.05842	0.380683	0.00197975	0.0167111	0.887124	YLR248W	2033	RCK2	Protein kinase involved in the response to oxidative and osmotic stress identified as suppressor of S. pombe cell cycle checkpoint mutations similar to CaM (calmodulin) kinases
	YOL119C	6.58381	0.379435	0.00559852	0.0345953	0.648309	YOL119C	1706	MCH4	Protein with similarity to mammalian monocarboxylate permeases, which are involved in transport of monocarboxylic acids across the plasma membrane mutant is not deficient in monocarboxylate transport
	YJL004C	5.00798	0.379421	0.00914396	0.0491471	0.834286	YJL004C	812	SYS1	Integral membrane protein of the Golgi required for targeting of the Arf-like GTPase Arl3p to the Golgi multicopy suppressor of ypt6 null mutation
	YJL196C	6.14644	0.378074	0.00810003	0.0447369	0.621287	YJL196C	1133	ELO1	Elongase I, medium-chain acyl elongase, catalyzes carboxy-terminal elongation of unsaturated C12-C16 fatty acyl-CoAs to C16-C18 fatty acids
	YBR276C	5.73167	0.377574	0.0030247	0.0224692	0.93053	YBR276C	2624	PPS1	Protein phosphatase with specificity for serine, threonine, and tyrosine residues has a role in the DNA synthesis phase of the cell cycle
	YGL026C	9.13387	0.377532	0.00102205	0.0106542	0.974602	YGL026C	2324	TRP5	Tryptophan synthase, catalyzes the last step of tryptophan biosynthesis regulated by the general control system of amino acid biosynthesis
[truncated: 45 more rows]

## Sheet: DOWN in Dset1
YMR264W	6.45371	-0.286476	0.00590796	0.0361027	0.999376	YMR264W	812	CUE1	Endoplasmic reticulum membrane protein that recruits the ubiquitin-conjugating enzyme Ubc7p to the ER where it functions in protein degradation contains a CUE domain that binds ubiquitin to facilitate intramolecular monoubiquitination
[truncated: 544 more rows]

[truncated: 2 more sheets: GO term UP, GO term DOWN]
