# Supplementary material for: Coordination of Cell Cycle Progression and Mitotic Spindle Assembly Involves Histone H3 Lysine 4 Methylation by Set1/COMPASS
Source: Oxford University Press journal article supplement (doi:10.1534/genetics.116.194852), 2016-11-15
Supplement: files2.xlsx [file files2.xlsx]

## Sheet: Sine wave FDR 0.05 genes
GENE	SGD_NAME	convergent antisense ncRNA (delta-rrp6 dependent)	convergent antisensencRNA (delta-rrp6 independent)	TSS Upsteam of promoter	TSS in 3'UTR	Product of a bidirectional promotor
POL1	YNL102W	CUT812	ncRNA6662-5
RNR1	YER070W	CUT559	ncRNA4596-7
YBR071W	YBR071W		ncRNA3902
HHF2	YNL030W			ncRNA2941
RAD27	YKL113C	ncRNA1928
POL30	YBR088C					ncRNA0134 (rrp6 dependent)
MSA2	YKR077W		ncRNA5836
SVS1	YPL163C					ncRNA3551 (rrp6 dependent)
CDC9	YDL164C		ncRNA0315
TOS4	YLR183C
HHT1	YBR010W					ncRNA3883
YPS3	YLR121C	ncRNA2212	ncRNA2213
CRH1	YGR189C		ncRNA1229
SWE1	YJL187C		ncRNA1612	ncRNA5388(rrp6 dependent)
TOS6	YNL300W		ncRNA6523
TOS2	YGR221C		ncRNA1250 (set 1/3 dependent)
RFA1	YAR007C		ncRNA0032
MSH6	YDR097C	ncRN0454 (set1 dependent)
KCC4	YCL024W			ncRNA0243 (htz1 &rrp6 dependent)
SKG6	YHR149C			ncRNA5195 (rrp6 dependent)
TAF2	YCR042C	ncRNA0275
MRC1	YCL061C					ncRNA0227
CLN1	YMR199W		ncRNA6419-21
CLB6	YGR109C
MNN1	YER001W	ncrNA4532-33 (CUT548)
MSA1	YOR066W
CDC21	YOR074C					ncRNA3267
SPT21	YMR179W		ncRNA6396-7
ENB1	YOL158C	ncRNA3051-2 (set1 dependent)
RTT107	YHR154W	ncRNA5196-7 (set1 dependent)
MCM5	YLR274W		ncRNA6058
SWI4	YER111C				ncRNA0836
HTA1	YDR225W			ncRNA0514
PRI2	YKL045W	ncRNA5750
MCD1	YDL003W		nRNA4141-2
MSH2	YOL090W		ncRNA6877
IRR1	YIL026C	ncRNA1541-2
PDS5	YMR076C		ncRNA2562-4
RFA2	YNL312W			ncRNA2770
HTB1	YDR224C					ncRNA0514
PDR16	YNL231C		ncRNA2816
ACM1	YPL267W		ncRNA7242
PLM2	YDR501W		ncRNA4451 (set1 dependent)
OGG1	YML060W
DPB2	YPR175W		ncRNA7576
YDL211C	YDL211C		ncRNA0302
YIL141W/AXL2	YIL141W/YIL140W					ncRNA5264 (rrp6 dependent)
YLR049C	YLR049C		ncRNA5934
TOF1	YNL273W		ncRNA6547
HTA2	YBL003C			ncRNA3880 (rrp6 dependent)
YOL019W	YOL019W
PCL1	YNL289W				ncRNA6531 (rrp6 dependent)
RNH202	YDR279W	ncRNA4320
PIG1	YLR273C			ncRNA6058 (rrp6 dependent)
TPO2	YGR138C				ncRNA1191
CLB5	YPR120C
CTF18	YMR078C	ncRNA2567
RDH54	YBR073W					ncRNA3903 (rrp6 dependent)
RAD53	YPL153C				ncRNA2563
ASF1	YJL115W					ncRNA5431
ESC8	YOL017W		ncRNA6930
TUB4	YLR212C					ncRNA2263 (rrp6 dependent)
PDS1	YDR113C	ncRNA0457
SEN34	YAR008W	ncRNA3839
CIN2	YPL241C	ncRNA3501
HHF1	YBR009C			ncRNA3883
CTF4	YPR135W	ncRNA7546-8
ECO1	YFR027W
POL2	YNL262W	ncRNA0548-9
CLN2	YPL256C
PIR3	YKL163W			ncRNA1882-4
HHT2	YNL031C					ncRNA2941
LOH1	YJL038C	ncRNA1717-20 (set1/3)
NSE4	YDL105W		ncRNA4086
GIN4	YDR507C		ncRNA0683
YOR114W	YOR114W		ncRNA7047-8
RFA3	YJL173C					ncRNA1618 (rrp6 dependent)
YOX1	YML027W			ncRNA2509
CDC45	YLR103C			ncRNA5958
BNI4	YNL233W		ncRNA6568
SGO1	YOR073W		ncRNA7013
SPO16	YHR153C			ncRNA5196
SMC3	YJL074C		ncRNA1689-92
POL12	YBL035C	ncRNA0067

## Sheet: GO term Sine wave genes
N	X	LOD	P	P_adj	attrib ID	attrib name
34	320	1.06292	2.55128e-20	<0.001	GO:0006974	cellular response to DNA damage stimulus
32	275	1.09458	2.92954e-20	<0.001	GO:0006281	DNA repair
34	332	1.04402	8.4749e-20	<0.001	GO:0044427	chromosomal part
30	242	1.11264	9.93068e-20	<0.001	GO:0044454	nuclear chromosome part
36	435	0.950308	6.1877e-18	<0.001	GO:0006259	DNA metabolic process
41	596	0.895598	9.38328e-18	<0.001	GO:0022402	cell cycle process
20	99	1.30551	2.03875e-17	<0.001	GO:0006260	DNA replication
33	429	0.890544	2.35215e-15	<0.001	GO:0051276	chromosome organization
36	577	0.805002	5.76376e-14	<0.001	GO:0033554	cellular response to stress
10	21	1.79782	2.0685e-13	<0.001	GO:0005657	replication fork
10	25	1.66784	1.81971e-12	<0.001	GO:0031298	replication fork protection complex
19	159	1.02452	3.2213e-12	<0.001	GO:0005694	chromosome
15	90	1.17442	6.10635e-12	<0.001	GO:0006302	double-strand break repair
7	9	2.29806	7.64302e-12	<0.001	GO:0000788	nuclear nucleosome
25	319	0.847738	1.03292e-11	<0.001	GO:0007049	cell cycle
36	713	0.694636	3.65509e-11	<0.001	GO:0006950	response to stress
9	26	1.56571	1.17603e-10	<0.001	GO:0007064	mitotic sister chromatid cohesion
10	36	1.434	1.2262e-10	<0.001	GO:0007062	sister chromatid cohesion
7	12	1.95539	1.61699e-10	<0.001	GO:0000786	nucleosome
7	12	1.95539	1.61699e-10	<0.001	GO:1990104	DNA bending complex
38	835	0.653416	1.82393e-10	<0.001	GO:0051716	cellular response to stimulus
29	522	0.698807	7.27288e-10	<0.001	GO:0003677	DNA binding
25	397	0.738641	1.20042e-09	<0.001	GO:0048610	cellular process involved in reproduction
58	1943	0.580166	2.53744e-09	<0.001	GO:0005634	nucleus
6	10	1.97491	2.90313e-09	<0.001	GO:0043596	nuclear replication fork
7	17	1.67414	3.72071e-09	<0.001	GO:0044815	DNA packaging complex
9	37	1.35297	4.0558e-09	<0.001	GO:0000228	nuclear chromosome
8	27	1.46453	5.57909e-09	<0.001	GO:0006334	nucleosome assembly
39	1024	0.56282	1.94014e-08	<0.001	GO:0050896	response to stimulus
12	95	1.01822	2.52572e-08	<0.001	GO:0065004	protein-DNA complex assembly
13	117	0.958436	3.04291e-08	<0.001	GO:0032993	protein-DNA complex
8	33	1.34751	3.22616e-08	<0.001	GO:0006270	DNA replication initiation
16	193	0.82777	4.62054e-08	<0.001	GO:0051726	regulation of cell cycle
14	153	0.867097	1.03625e-07	<0.001	GO:0006310	DNA recombination
6	19	1.49702	3.33977e-07	<0.001	GO:0043570	maintenance of DNA repeat elements
5	11	1.73699	4.11091e-07	<0.001	GO:0006273	lagging strand elongation
8	45	1.179	4.28196e-07	<0.001	GO:0006289	nucleotide-excision repair
8	46	1.16748	5.11692e-07	<0.001	GO:0006333	chromatin assembly or disassembly
7	33	1.27072	6.63714e-07	<0.001	GO:0046982	protein heterodimerization activity

## Sheet: Cluster changing genes
	Cluster_WT	Cluster_DS1	Membership_Difference	convergent antisense ncRNA (delta-rrp6 dependent)	convergent antisensencRNA (delta-rrp6 independent)	TSS Upsteam of promoter	TSS in 3'UTR	Product of a bidirectional promotor
YDR034W-B	1	8	1	tQ(UUG)
HSP12	1	7	1			CUT122
NQM1	1	6	1			ncRNA4919
FIG2	1	9	1
PRM3	1	7	0.999998	CUT406-7
ASG7	1	9	0.999997	ncRNA1620-3
HHF1	5	9	0.999994			ncRNA3883
PIR1	6	8	0.999977		ncRNA1881
HTB2	5	9	0.999976					ncRNA3880 (rrp6 dependent)
ALD3	1	2	0.99997			ncRNA6384 (rrp6 & set1 dependent
CLB1	2	8	0.999961	ncRNA1176
AIM20	2	8	0.999957		ncRNA5257-8
RPS12	3	8	0.99995			ncRNA7220
BUD4	2	8	0.99994		ncRNA5574-6
HTA2	5	8	0.999929			ncRNA3880
POL30	4	6	0.999859					ncRNA0134 (rrp6 dependent)
IRC8	2	8	0.999753	ncRNA5485-6
CDC5	2	8	0.999749					ncRNA2524
SPO16	4	8	0.999683			ncRNA5196
GAP1	1	8	0.99967					ncRNA2025-6(rrp6 dependent)
NRM1	5	6	0.999652
MSC1	1	7	0.999517	CUT280
YLR049C	4	8	0.999501		ncRNA5934
HHT2	5	9	0.999494					ncRNA2941
YML119W	2	7	0.999336		ncRNA2459
HOF1	2	1	0.999246	ncRNA6286-8
MPS3	3	8	0.99923	ncRNA5502-6
TOS6	5	8	0.999036		ncRNA6523
HTA1	5	2	0.998873			ncRNA0514
PRY3	3	2	0.998869		ncRNA1688	CUT687
AIM44	6	8	0.998582	ncRNA3556-7
SED1	4	7	0.998503				ncRNA0440
NCA3	1	8	0.998051		ncRNA1669 (set1 dependent)
KIN3	2	8	0.997649	CUT004
PHO3	2	9	0.99755	ncRN0135 (set1 dependent)
HHF2	5	8	0.997207			ncRNA2941
TOS4	4	2	0.997193
RNR1	4	8	0.996822	CUT559
HTB1	5	7	0.996551					ncRNA0514
ALK1	2	9	0.996317				ncRNA4873 (rrp6 dependent)
CRH1	4	8	0.994945		ncRNA1229
HSP150	6	8	0.993773			ncRNA1633 (rrp6 dependent)
DSE4	6	8	0.991887		ncRNA3025-7
MCD1	4	2	0.989774		nRNA4141-2
YGP1	4	8	0.989295		ncRNA6624	ncRNA2871 (rrp6 dependent)
YHP1	5	9	0.987868	CUT703-4
ASH1	6	8	0.985284					ncRNA4428 (rrp6 dependent)
SIC1	4	7	0.976334
PRI2	4	9	0.972454	ncRNA5750
DSE3	6	9	0.971509	ncRNA7139
NCE102	3	8	0.952876		ncRNA7555
SVS1	5	3	0.928489					ncRNA3551 (rrp6 dependent)
SPI1	1	2	0.928018			ncRNA0863 (rrp6 dependent)
MSA2	4	9	0.919462		ncRNA5836
MFA2	1	6	0.918253				ncRNA2881
PCL9	6	3	0.903084	CUT476
MNN1	4	8	0.874351	ncrNA4532-33
TIR1	2	6	0.844828		ncRNA4544
HXT2	1	9	0.83541		ncRNA6270
YNL058C	3	9	0.712679		ncRNA2923
HPF1	2	5	0.668652			ncRNA6819 (rrp6 dependent)
PST1	1	7	0.620537			CUT066
HLR1	4	2	0.612716			ncRNA0696 (rrp6 dependent)
BUD9	4	2	0.581417		ncRNA4917
TIR3	2	3	0.562901		ncRNA5322	ncRNA1550 (rrp6 dependent)
WSC4	3	8	0.53835	CUT637
YFL032W/HAC1	3	6	0.20513
SPT21	4	7	0.164908		ncRNA6396-7
PLB2	2	3	0.160189		ncRNA2525 (set1 dependent)
FAR1	1	8	0.0776131	ncRNA1635
CLN1	4	7	0.0133986		ncRNA6419-21
PCL1	4	7	0.0129096				ncRNA6531 (rrp6 dependent)
YBR071W	4	7	0.00574401		ncRNA3902
CLN2	4	7	0.00558654
MCM7	4	9	0.00348617			CUT031
ARO10	1	9	0.00334393		ncRNA4387
ACM1	4	7	0.00108483		ncRNA7242
AUA1	1	9	0.000334311				ncRNA4694 (set1 dependent)
CLB6	4	7	0.000184978
ARO9	1	9	0.000110429			ncRNA1434 (set1 dependent)
AFR1	1	8	5.03682e-05	ncRNA0442
PRM4	1	8	1.34601e-06	ncRNA7331
KAR5	1	8	6.7875e-07		ncRNA6309-11		Cut770
FUS2	1	8	6.66921e-07		ncRNA6443-4
FIG1	1	8	2.03653e-07

## Sheet: GO terms Cluster changing genes
http://llama.mshri.on.ca/funcassociate/							GO-Slim process analyses from SGD
N	X	LOD	P	P_adj	attrib ID	attrib name	GOID	GO term	Frequency	Genome Frequency	Gene(s)
16	91	1.20653	4.77054e-13	<0.001	GO:0009277	fungal-type cell wall	278	mitotic cell cycle	19 out of 85 genes, 22.4%	319 of 6338 genes, 5.0%	POL30,MCD1,PCL9,YHP1,ALK1,BUD9,CLB1,CLB6,MPS3,BUD4,ASH1,MSA2,SIC1,CDC5,HOF1,HHT2,NRM1,AIM44,ACM1
16	98	1.16742	1.58993e-12	<0.001	GO:0005618	cell wall	51726	regulation of cell cycle	11 out of 85 genes, 12.9%	211 of 6338 genes, 3.3%	CLB1,CLB6,SPO16,FAR1,ASH1,SIC1,CDC5,CLN1,HHT2,PCL1,CLN2
16	98	1.16742	1.58993e-12	<0.001	GO:0030312	external encapsulating structure	42221	response to chemical	11 out of 85 genes, 12.9%	440 of 6338 genes, 6.9%	FIG1,FIG2,AFR1,HSP12,HAC1,NQM1,FAR1,FUS2,MFA2,SVS1,CLN2
16	99	1.16211	1.87275e-12	<0.001	GO:0005576	extracellular region	746	conjugation	11 out of 85 genes, 12.9%	124 of 6338 genes, 2%	FIG1,FIG2,AFR1,MPS3,FAR1,ASG7,KAR5,FUS2,MFA2,PRM3,CLN2
7	9	2.29738	7.69775e-12	<0.001	GO:0000788	nuclear nucleosome	6325	chromatin organization	11 out of 85 genes, 12.9%	317 of 6338 genes, 5.0%	HTB2,HTA2,HHF1,POL30,MCM7,HTB1,HTA1,MPS3,SPT21,HHF2,HHT2
7	12	1.9547	1.62846e-10	<0.001	GO:0000786	nucleosome	51321	meiotic cell cycle	11 out of 85 genes, 12.9%	280 of 6338 genes, 4.4%	HHF1,POL30,HAC1,CLB1,CLB6,SPO16,MPS3,MSC1,CDC5,HHF2,HHT2
11	56	1.24204	8.09842e-10	<0.001	GO:0031225	anchored component of membrane	8150	biological process unknown	11 out of 85 genes, 12.9%	1049 of 6338 genes, 16.6%	YBR071W,YDR034W-B,TIR1,TIR3,AIM20,YLR049C,YML119W,YNL058C,TOS6,DSE3,PRM4
8	25	1.51095	2.81352e-09	<0.001	GO:1904029	regulation of cyclin-dependent protein kinase activity	6974	cellular response to DNA damage stimulus	10 out of 85 genes, 11.8%	298 of 6338 genes, 4.7%	HTA2,POL30,MCM7,MCD1,HTB1,HTA1,PRI2,TOS4,HOF1,HHT2
7	17	1.67346	3.74671e-09	<0.001	GO:0044815	DNA packaging complex	6468	protein phosphorylation	10 out of 85 genes, 11.8%	199 of 6338 genes, 3.1%	KIN3,ALK1,CLB1,CLB6,SIC1,CDC5,CLN1,PCL1,CLN2,NCE102
8	26	1.48673	4.01116e-09	<0.001	GO:0016538	cyclin-dependent protein serine/threonine kinase regulator activity	71554	cell wall organization or biogenesis	9 out of 85 genes, 10.6%	200 of 6338 genes, 3.2%	PST1,SED1,HLR1,CRH1,HSP150,PIR1,YGP1,HPF1,NCE102
7	22	1.5039	3.0783e-08	<0.001	GO:0000079	regulation of cyclin-dependent protein serine/threonine kinase activity	31399	regulation of protein modification process	9 out of 85 genes, 10.6%	115 of 6338 genes, 1.8%	CLB1,CLB6,SPO16,SIC1,CLN1,PCL1,CLN2,ACM1,NCE102
9	49	1.19854	5.78101e-08	<0.001	GO:0032993	protein-DNA complex	48285	organelle fission	9 out of 85 genes, 10.6%	297 of 6338 genes, 4.7%	POL30,MCD1,ALK1,CLB1,SPO16,MPS3,MSC1,CDC5,HHT2
21	385	0.644903	4.3467e-07	0.001	GO:0007049	cell cycle	6281	DNA repair	8 out of 85 genes, 9.4%	246 of 6338 genes, 3.9%	HTA2,POL30,MCM7,MCD1,HTB1,HTA1,PRI2,HHT2
7	32	1.28685	5.33307e-07	0.001	GO:0046982	protein heterodimerization activity	6366	transcription from RNA polymerase II promoter	8 out of 85 genes, 9.4%	478 of 6338 genes, 7.5%	HHF1,HTB1,HTA1,YHP1,HAC1,ASH1,SPT21,NRM1
7	33	1.27006	6.68127e-07	0.001	GO:0071900	regulation of protein serine/threonine kinase activity	7059	chromosome segregation	7 out of 85 genes, 8.2%	197 of 6338 genes, 3.1%	KIN3,POL30,MCD1,SPO16,MPS3,CDC5,HHT2
8	52	1.10335	1.37524e-06	0.002	GO:0019887	protein kinase regulator activity	7010	cytoskeleton organization	6 out of 85 genes, 7.1%	237 of 6338 genes, 3.7%	CLB1,MPS3,BUD4,CDC5,HOF1,PCL1
9	72	1.00128	1.77244e-06	0.002	GO:0001932	regulation of protein phosphorylation	6310	DNA recombination	6 out of 85 genes, 7.1%	175 of 6338 genes, 2.8%	MCM7,MCD1,SPO16,IRC8,MSC1,CDC5
8	54	1.08409	1.85234e-06	0.002	GO:0019207	kinase regulator activity	33043	regulation of organelle organization	5 out of 85 genes, 5.9%	292 of 6338 genes, 4.6%	CLB1,SPO16,CDC5,HOF1,HHT2
8	54	1.08409	1.85234e-06	0.002	GO:0045859	regulation of protein kinase activity	6997	nucleus organization	5 out of 85 genes, 5.9%	66 of 6338 genes, 1.0%	MPS3,CDC5,KAR5,FUS2,PRM3
6	25	1.33621	2.02847e-06	0.002	GO:0031298	replication fork protection complex	6260	DNA replication	5 out of 85 genes, 5.9%	150 of 6338 genes, 2.4%	POL30,MCM7,MCD1,CLB6,PRI2
10	95	0.9194	2.28087e-06	0.002	GO:0051338	regulation of transferase activity	23052	signaling	5 out of 85 genes, 5.9%	240 of 6338 genes, 3.8%	AFR1,HAC1,FAR1,MFA2,CLN2
12	144	0.812514	2.56812e-06	0.002	GO:0031399	regulation of protein modification process	910	cytokinesis	4 out of 85 genes, 4.7%	81 of 6338 genes, 1.3%	BUD9,BUD4,HOF1,AIM44
8	58	1.04792	3.23857e-06	0.002	GO:0043549	regulation of kinase activity	51052	regulation of DNA metabolic process	4 out of 85 genes, 4.7%	110 of 6338 genes, 1.7%	POL30,CLB6,SPO16,ASH1
25	602	0.527357	4.66988e-06	0.005	GO:0022402	cell cycle process	43934	sporulation	4 out of 85 genes, 4.7%	133 of 6338 genes, 2.1%	HHF1,SPO16,HHF2,HHT2
18	341	0.615389	5.49794e-06	0.005	GO:1903047	mitotic cell cycle process	902	cell morphogenesis	4 out of 85 genes, 4.7%	29 of 6338 genes, 0.5%	FIG1,FIG2,AFR1,FUS2
9	83	0.930964	5.92636e-06	0.005	GO:0042325	regulation of phosphorylation	48284	organelle fusion	4 out of 85 genes, 4.7%	88 of 6338 genes, 1.4%	MPS3,KAR5,FUS2,PRM3
7	45	1.10683	6.07113e-06	0.005	GO:0006333	chromatin assembly or disassembly	6811	ion transport	3 out of 85 genes, 3.5%	258 of 6338 genes, 4.1%	AUA1,GAP1,NCE102
20	444	0.545926	1.66935e-05	0.021	GO:0022414	reproductive process	6520	cellular amino acid metabolic process	3 out of 85 genes, 3.5%	210 of 6338 genes, 3.3%	ARO10,ARO9,ALD3
14	246	0.636077	3.09354e-05	0.035	GO:0044454	nuclear chromosome part	18193	peptidyl-amino acid modification	3 out of 85 genes, 3.5%	150 of 6338 genes, 2.4%	HHF1,SPO16,HHF2
							8213	protein alkylation	2 out of 85 genes, 2.4%	50 of 6338 genes, 0.8%	HHF1,HHF2
							5975	carbohydrate metabolic process	2 out of 85 genes, 2.4%	255 of 6338 genes, 4.0%	MNN1,CRH1
							7005	mitochondrion organization	2 out of 85 genes, 2.4%	420 of 6338 genes, 6.6%	SED1,NCA3
							6869	lipid transport	2 out of 85 genes, 2.4%	65 of 6338 genes, 1.0%	PRY3,NCE102
							16570	histone modification	2 out of 85 genes, 2.4%	114 of 6338 genes, 1.8%	HHF1,HHF2
							70271	protein complex biogenesis	2 out of 85 genes, 2.4%	329 of 6338 genes, 5.2%	MPS3,CDC5
							6979	response to oxidative stress	2 out of 85 genes, 2.4%	101 of 6338 genes, 1.6%	HSP12,NQM1
							9408	response to heat	2 out of 85 genes, 2.4%	70 of 6338 genes, 1.1%	HSP12,WSC4
							70647	protein modification by small protein conjugation or removal	2 out of 85 genes, 2.4%	169 of 6338 genes, 2.7%	SPO16,ACM1
							6865	amino acid transport	2 out of 85 genes, 2.4%	42 of 6338 genes, 0.7%	AUA1,GAP1

## Sheet: Common to sine wave and cluster
Genes in both the 84 cell-cycle list and the changed cluster list.
ACM1
CLB6
CLN1
CLN2
CRH1
HHF1
HHF2
HHT2
HTA1
HTA2
HTB1
MCD1
MNN1
MSA2
PCL1
POL30
PRI2
RNR1
SPO16
SPT21
SVS1
TOS4
TOS6
YBR071W
YLR049C
