# Supplementary material for: Coordination of Cell Cycle Progression and Mitotic Spindle Assembly Involves Histone H3 Lysine 4 Methylation by Set1/COMPASS
Source: Oxford University Press journal article supplement (doi:10.1534/genetics.116.194852), 2016-11-15
Supplement: tables2.docx [file tables2.docx]

| Name | Sequence |
| --- | --- |
| mPAT-Reverse | CAGACGTGTGCTCTTCCGATCTTTTTTTTTTTTTTTTTT |
| TUB1-mPAT | CCTACACGACGCTCTTCCGATCTGGGTGCCGACTCATACGC |
| TUB2-mPAT | CCTACACGACGCTCTTCCGATCTCTAGGATTGAAGCACTTGGAGC |
| TUB3-mPAT | CCTACACGACGCTCTTCCGATCTGCTGAGGAGTTCTAAGAAAGTGGC |
| TUB4-mPAT | CCTACACGACGCTCTTCCGATCTCCTTCCTTGTTCAGGAATTTTACC |
| CLN1-mPAT | CCTACACGACGCTCTTCCGATCTGCGTCTTCGATATCGCTATCG |
| CLN2-mPAT | CCTACACGACGCTCTTCCGATCTGCCAATTTGCCAAACGTACC |
| CLB5-mPAT | CCTACACGACGCTCTTCCGATCTGCTCATGAATTCGCATACTCTT |
| CLB2-mPAT | CCTACACGACGCTCTTCCGATCTGCGAGGGTAGACAAAGAAAAGC |
| CLB6-mPAT | CCTACACGACGCTCTTCCGATCTCATGGCATGGTTTATTTCAAGG |
| CLB1-mPAT | CCTACACGACGCTCTTCCGATCTGCATGAGTGAAGGTGCTAGCC |
| NRM1-mPAT | CCTACACGACGCTCTTCCGATCTGCATCAAAGCCGCTAAGTC |
| RNR1-mPAT | CCTACACGACGCTCTTCCGATCTCCAGAAGCTTGTGAAATGTGTTC |
| POL1-mPAT | CCTACACGACGCTCTTCCGATCTGTCGCTACGTTGATATGACTAGC |
| POL30-mPAT | CCTACACGACGCTCTTCCGATCTGGCTCCTAAATTTAATGACGAAG |
| CDC20-mPAT | CCTACACGACGCTCTTCCGATCTCCAGCCAATATTTGATCAGG |
| CDC5-mPAT | CCTACACGACGCTCTTCCGATCTCCAGTCCATTGATTGGGCC |
| HHF1-mPAT | CCTACACGACGCTCTTCCGATCTGGGATTCGTATTCAACTGCC |
| HHF2-mPAT | CCTACACGACGCTCTTCCGATCTCGGTGGTTAAACAATCGGTGG |
| HHT1-mPAT | CCTACACGACGCTCTTCCGATCTGAGGTGAAAGATCATAGTTTGTTG |
| HHT2-mPAT | CCTACACGACGCTCTTCCGATCTCGACATGAGGAGGGTATATATGC |
| HTB1-mPAT | CCTACACGACGCTCTTCCGATCTCCAAGTACTCTTCCTCTACTCAAGC |
| HTB2-mPAT | CCTACACGACGCTCTTCCGATCTGGGTCTAGTCTATCAGCCTCC |
| KCC4-mPAT | CCTACACGACGCTCTTCCGATCTGGACAATACGATGTAACACCG |
| PIR3-mPAT | CCTACACGACGCTCTTCCGATCTCACACATTATCGTTCGTCGC |
| MSA1-mPAT | CCTACACGACGCTCTTCCGATCTCTTTCAACTGATGCATGTGAATG |
| MSA2-mPAT | CCTACACGACGCTCTTCCGATCTGTCTCCAGAGAGTAGGTCCATTTGG |
| LOH1-mPAT | CCTACACGACGCTCTTCCGATCTCCGCCTATTCATCCATGACTG |
| HIF1-mPAT | CCTACACGACGCTCTTCCGATCTGGTCAAGAAGAAGCCTAGAAGGC |
| SRP68-mPAT | CCTACACGACGCTCTTCCGATCTGGTTTCTTGGGCCTATTTGG |
| PRP46-mPAT | CCTACACGACGCTCTTCCGATCTGCGCCAAAAGATTTTAGTGGG |
| FAR1-mPAT | CCTACACGACGCTCTTCCGATCTCCACGTCTATACTACGCAATGAC |
| SUT24-mPAT | CCTACACGACGCTCTTCCGATCTCCCACGAAGCTTTCCAGTGG |
| TOS2-mPAT | CCTACACGACGCTCTTCCGATCTCACCGTACGAGAATGTACATG |
| TOS6-mPAT | CCTACACGACGCTCTTCCGATCTGACGCAGAAGGCACCTTACTAG |
| SWI4-mPAT | CCTACACGACGCTCTTCCGATCTGGATTTGAGGGCAAACGC |
| ACM1-mPAT | CCTACACGACGCTCTTCCGATCTCTGTCCTTCCACGTCTATGAAG |
| MCD1-mPAT | CCTACACGACGCTCTTCCGATCTGGGGATTTCTTGGTGGACCC |
| TOM70-mPAT | CCTACACGACGCTCTTCCGATCTAGACTAAATGACAAAGGAAGAGCAGC |
| APQ12-mPAT | CCTACACGACGCTCTTCCGATCTGAAACGCCTCTGCTTACTCGG |
| MRPL10-mPAT | CCTACACGACGCTCTTCCGATCTCTCCAGAGAAGGATTGGGTGC |

**Table S2: Oligonucleotides used in this study**
